# Supplementary material for: Comparative effectiveness of different exercises on bone mineral density in postmenopausal women: a systematic review and network meta-analysis of randomized controlled trials
Source: medRxiv preprint, doi:10.1101/2021.07.12.21260370, version 1 (2021-07-16)
Supplement: supplementary material [file 260370_file02.docx]

Contents

[Appendix 1: MEDLINE search strategy 3](#_Toc74521923)

[Appendix 2: Statistical methods in detail 4](#_Toc74521924)

[Appendix 3: Flowchart of literature search and study selection. 5](#_Toc74521925)

[Appendix 4: Details of included and excluded studies 6](#_Toc74521926)

[Appendix 5: PEDro assessment quality results of included studies 23](#_Toc74521927)

[Appendix 6: Side-split analyses from network meta-analysis of studies examining the efficacy of exercise intervention in postmenopausal women. 27](#_Toc74521928)

[Appendix 7: Network graph of included studies for bone mineral density 29](#_Toc74521929)

[Appendix 8: Cumulative ranking plots for BMD at LS 31](#_Toc74521930)

[Appendix 9: Cumulative ranking plots for BMD at FN 32](#_Toc74521931)

[Appendix 10: Cumulative ranking plots for BMD at TH 33](#_Toc74521932)

[Appendix 11: Relative effect estimates for the contrasts between the different interventions and control arms on BMD at TH 34](#_Toc74521933)

[Appendix 12.1: Relative effect estimates for the contrasts between the different interventions and control arms on BMD at LS in participants with age no less than 60 35](#_Toc74521934)

[Appendix 12.2: Relative effect estimates for the contrasts between the different interventions and control arms on BMD at FN in participants with age no less than 60 36](#_Toc74521935)

[Appendix 12.3: Relative effect estimates for the contrasts between the different interventions and control arms on BMD at TH in participants with age no less than 60 37](#_Toc74521936)

[Appendix 13: Cumulative ranking plots to show comparative effectiveness of treatments from a BMD outcome at (A) LS, (B) FN, and (C) FN network meta-analysis in participants with age no less than 60 38](#_Toc74521937)

[Appendix 14.1: Relative effect estimates for the contrasts between the different interventions and control arms on BMD at LS in participants younger than 60 years old 40](#_Toc74521938)

[Appendix 14.2: Relative effect estimates for the contrasts between the different interventions and control arms on BMD at FN in participants younger than 60 years old 41](#_Toc74521939)

[Appendix 14.3: Relative effect estimates for the contrasts between the different interventions and control arms on BMD at TH in participants younger than 60 years old 42](#_Toc74521940)

[Appendix 15: Cumulative ranking plots to show comparative effectiveness of treatments from a BMD outcome at (A) LS, (B) FN, and (C) FN network meta-analysis in participants younger than 60 years old 43](#_Toc74521941)

[Appendix 16.1: Relative effect estimates for the contrasts between the different interventions and control arms on BMD at LS when exercise intervention with duration no more than eight months 45](#_Toc74521942)

[Appendix 16.2: Relative effect estimates for the contrasts between the different interventions and control arms on BMD at FN when exercise intervention with duration no more than eight months 46](#_Toc74521943)

[Appendix 16.3: Relative effect estimates for the contrasts between the different interventions and control arms on BMD at TH when exercise intervention with duration no more than eight months 47](#_Toc74521944)

[Appendix 17: Cumulative ranking plots to show comparative effectiveness of treatments from a BMD outcome at (A) LS, (B) FN, and (C) FN network meta-analysis when exercise intervention with duration no more than eight months 48](#_Toc74521945)

[Appendix 18.1: Relative effect estimates for the contrasts between the different interventions and control arms on BMD at LS when exercise intervention with duration between 9 to 18 months 50](#_Toc74521946)

[Appendix 18.2: Relative effect estimates for the contrasts between the different interventions and control arms on BMD at FN when exercise intervention with duration between 9 to 18 months 51](#_Toc74521947)

[Appendix 18.3: Relative effect estimates for the contrasts between the different interventions and control arms on BMD at TH when exercise intervention with duration between 9 to 18 months 52](#_Toc74521948)

[Appendix 19: Cumulative ranking plots to show comparative effectiveness of treatments from a BMD outcome at (A) LS, (B) FN, and (C) FN network meta-analysis when exercise intervention with duration between 9 to 18 months 53](#_Toc74521949)

[Appendix 20: Summary of certainty of evidence for network meta-analysis in studies examining the effects of physical exercise in postmenopausal women for BMD at LS, FN, and TH. 55](#_Toc74521950)

[Appendix 21.1: Details on the CINeMA assessment of each pairwise comparisons for BMD at LS 56](#_Toc74521951)

[Appendix 21.2: Details on the CINeMA assessment of each pairwise comparisons for BMD at FN 60](#_Toc74521952)

[Appendix 21.3: Details on the CINeMA assessment of each pairwise comparisons for BMD at TH 64](#_Toc74521953)

[Appendix 22: Funnel plot for the BMT at (A) LS, (B) FN, and (C) FN network 67](#_Toc74521954)

[Reference 69](#_Toc74521955)

## Appendix 1: MEDLINE search strategy

1 osteoporosis/

2 osteoporo$.mp.

3 osteopenia.mp.

4 bone density/

5 bone densit$.mp.

6 bone loss$.mp.

7 bone mass$.mp.

8 bone mineral densit$.mp.

9 bone mineral content$.mp.

10 bone age.mp.

11 bone defect$.mp.

12 bone deminerali?ation.mp.

13 bone mineral$.mp.

14 bone strength.mp.

15 decalcifi$.mp.

16 deminerali?ed bone.mp.

17 or/1-16

18 exp Menopause/

19 (menopaus$ or postmenopaus$ or post-menopaus$ or (post adj menopause$)).mp.

20 18 or 19

21 17 and 20

22 exp exercise/

23 exp exercise therapy/

24 exerci$.mp.

25 exp sports/

26 sport$.mp.

27 physical fitness/

28 physical fitness.mp.

29 physical activit$.mp.

30 vibration/tu

31 vibration therap$.mp.

32 22 OR 23 OR 24 OR 25 OR 26 OR 27 OR 28 OR 29 OR 30 OR 31

33 randomized controlled trial.pt.

34 controlled clinical trial.pt.

35 randomi?ed.ab.

36 placebo.ab.

37 clinical trials as topic.sh.

38 randomly.ab.

39 trial.ti.

40 33 OR 34 OR 35 OR 36 OR 37 OR 38 OR 39

41 21 AND 32 AND 40

## Appendix 2: Statistical methods in detail

**Calculation of change score**

If the studies presented a confidence interval (CI) or standard errors (SE), they were converted to standard deviation (SD) by using the following formula: SD=. 3 2 1 1 When the SDs of absolute changes from baseline were not available from individual trials, we imputed them as described in detail in the Cochrane Handbook: . 3 2 1 1 R refers to correlation coefficient which was calculated using the mean of the correlations available for some included studies. Therefore, the value was estimated of r=0·82 and r=0·76 in exercise and control groups at LS, respectively. It also resulted in a within-group correlation of r=0·85 for the exercise group and r=0·96 among control groups at FN. Finally, at TH, r=0·98 and r=0·99 were considered for intervention and control groups, respectively. Using the imputed correlation coefficient values, we thereafter derived unavailable from calculated .

**Assessment for convergence**

We evaluated convergence according to the Brooks-Gelman-Rubin method. This method calculates the possible scale reduction factor (PSRF) by comparing within- and between-chain variation. Convergence is deemed favorable if PSRF is close to one, and the consistency of the homogeneity model was considered reliable for further analysis. With regard to the inconsistency model, if there is no inconsistency, the random effects variance and inconsistency variance should be roughly equal. If the latter one is bigger, that indicates a problem.4 The node splitting method was used to further examine the inconsistency between the direct and indirect evidence (with high p values indicating better consistency).5

## Appendix 3: Flowchart of literature search and study selection.

**
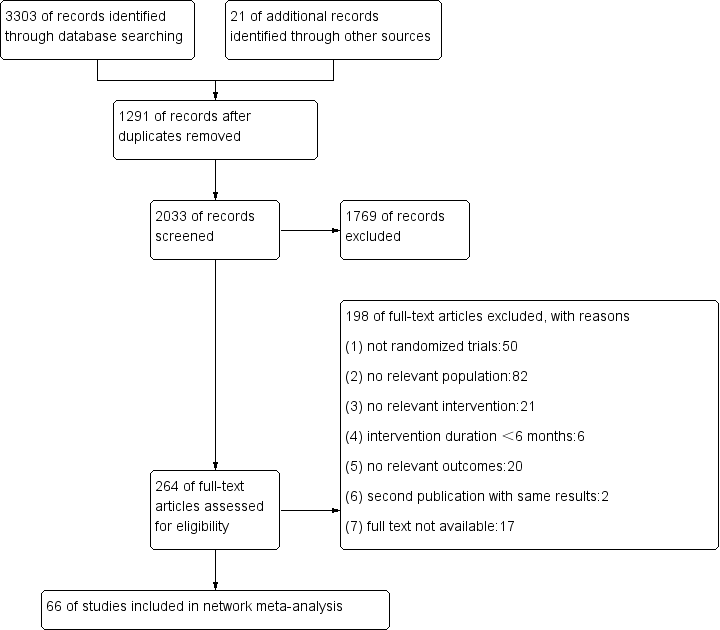
**

## Appendix 4: Details of included and excluded studies

**2.1 list of include studies**

1. Sen EI, Esmaeilzadeh S, Eskiyurt N. Effects of whole-body vibration and high impact exercises on the bone metabolism and functional mobility in postmenopausal women. Journal of Bone & Mineral Metabolism. 2020;**38**(3):392-404.

2. Montgomery GJ, Abt G, Dobson CA, Evans WJ, Aye M, Ditroilo M. A 12-month continuous and intermittent high-impact exercise intervention and its effects on bone mineral density in early postmenopausal women: a feasibility randomized controlled trial. Journal of Sports Medicine & Physical Fitness. 2020;**60**(5):770-78.

3. ElDeeb AM, Abdel-Aziem AA. Effect of Whole-Body Vibration Exercise on Power Profile and Bone Mineral Density in Postmenopausal Women With Osteoporosis: A Randomized Controlled Trial. Journal of Manipulative & Physiological Therapeutics. 2020;**43**(4):384-93.

4. de Oliveira LC, de Oliveira RG, de Almeida Pires-Oliveira DA. Effects of Whole-Body Vibration Versus Pilates Exercise on Bone Mineral Density in Postmenopausal Women: A Randomized and Controlled Clinical Trial. Journal of Geriatric Physical Therapy. 2019;**42**(2):E23-E31.

5. Duff WRD, Kontulainen SA, Candow DG, Gordon JJ, Mason RS, Taylor-Gjevre R, et al. Effects of low-dose ibuprofen supplementation and resistance training on bone and muscle in postmenopausal women: A randomized controlled trial. Bone Report. 2016;**5**:96-103.

6. Wang H, Yu B, Chen W, Lu Y, Yu D. Simplified Tai Chi resistance training versus traditional Tai Chi in slowing bone loss in postmenopausal women. Evidence-based Complementary and Alternative Medicine. 2015;**2015 (no pagination)**.

7. Nicholson VP, McKean MR, Slater GJ, Kerr A, Burkett BJ. Low-Load Very High-Repetition Resistance Training Attenuates Bone Loss at the Lumbar Spine in Active Post-menopausal Women. Calcified Tissue International. 2015;**96**(6):490-9.

8. Liu B-X, Chen S-P, Li Y-D, Wang J, Zhang B, Lin Y, et al. The Effect of the Modified Eighth Section of Eight-Section Brocade on Osteoporosis in Postmenopausal Women: A Prospective Randomized Trial. Medicine. 2015;**94**(25):e991.

9. Moreira LDF, Fronza FCAO, Dos Santos RN, Zach PL, Kunii IS, Hayashi LF, et al. The benefits of a high-intensity aquatic exercise program (HydrOS) for bone metabolism and bone mass of postmenopausal women. Journal of Bone & Mineral Metabolism. 2014;**32**(4):411-9.

10. Lai C-L, Tseng S-Y, Chen C-N, Liao W-C, Wang C-H, Lee M-C, et al. Effect of 6 months of whole body vibration on lumbar spine bone density in postmenopausal women: a randomized controlled trial. Clinical Interventions In Aging. 2013;**8**:1603-9.

11. Kemmler W, Bebenek M, von Stengel S, Engelke K, Kalender WA. Effect of block-periodized exercise training on bone and coronary heart disease risk factors in early post-menopausal women: a randomized controlled study. Scandinavian Journal of Medicine & Science in Sports. 2013;**23**(1):121-9.

12. F O, E P-N, J N-N, C O, A T. Effects of isoflavone and counter-resistance training on bone mineral density in postmenopausal women. Rev Bras Cineantropom Desempenho Hum. 2013;**15**:726–36.

13. Chilibeck PD, Vatanparast H, Pierson R, Case A, Olatunbosun O, Whiting SJ, et al. Effect of exercise training combined with isoflavone supplementation on bone and lipids in postmenopausal women: a randomized clinical trial. Journal of Bone & Mineral Research. 2013;**28**(4):780-93.

14. Basat H, Esmaeilzadeh S, Eskiyurt N. The effects of strengthening and high-impact exercises on bone metabolism and quality of life in postmenopausal women: a randomized controlled trial. Journal of Back & Musculoskeletal Rehabilitation. 2013;**26**(4):427-35.

15. Wayne PM, Kiel DP, Buring JE, Connors EM, Bonato P, Yeh GY, et al. Impact of Tai Chi exercise on multiple fracture-related risk factors in post-menopausal osteopenic women: a pilot pragmatic, randomized trial. BMC Complementary & Alternative Medicine. 2012;**12**:7.

16. Karakiriou SK, Douda HT, Smilios IG, Volaklis KA, Tokmakidis SP. Effects of vibration and exercise training on bone mineral density and muscle strength in post-menopausal women. European Journal of Sport Science. 2012;**12**(1):81-88.

17. Bolton KL, Egerton T, Wark J, Wee E, Matthews B, Kelly A, et al. Effects of exercise on bone density and falls risk factors in post-menopausal women with osteopenia: a randomised controlled trial. Journal of Science & Medicine in Sport. 2012;**15**(2):102-9.

18. von Stengel S, Kemmler W, Engelke K, Kalender WA. Effects of whole body vibration on bone mineral density and falls: results of the randomized controlled ELVIS study with postmenopausal women. Osteoporosis International. 2011;**22**(1):317-25.

19. Von Stengel S, Kemmler W, Bebenek M, Engelke K, Kalender WA. Effects of whole-body vibration training on different devices on bone mineral density. Medicine & Science in Sports & Exercise. 2011;**43**(6):1071-9.

20. Tartibian B, Hajizadeh Maleki B, Kanaley J, Sadeghi K. Long-term aerobic exercise and omega-3 supplementation modulate osteoporosis through inflammatory mechanisms in post-menopausal women: a randomized, repeated measures study. Nutrition & Metabolism. 2011;**8**:71.

21. Slatkovska L, Alibhai SMH, Beyene J, Hu H, Demaras A, Cheung AM. Effect of 12 months of whole-body vibration therapy on bone density and structure in postmenopausal women: a randomized trial. Annals of Internal Medicine. 2011;**155**(10):668-79, W205.

22. Marques EA, Wanderley F, Machado L, Sousa F, Viana JL, Moreira-Goncalves D, et al. Effects of resistance and aerobic exercise on physical function, bone mineral density, OPG and RANKL in older women. Exp Gerontol. 2011;**46**(7):524-32.

23. Marques EA, Mota J, Machado L, Sousa F, Coelho M, Moreira P, et al. Multicomponent training program with weight-bearing exercises elicits favorable bone density, muscle strength, and balance adaptations in older women. Calcif Tissue Int. 2011;**88**(2):117-29.

24. Sakai A, Oshige T, Zenke Y, Yamanaka Y, Nagaishi H, Nakamura T. Unipedal standing exercise and hip bone mineral density in postmenopausal women: a randomized controlled trial. Journal of Bone & Mineral Metabolism. 2010;**28**(1):42-8.

25. Kemmler W, von Stengel S, Engelke K, Haberle L, Kalender WA. Exercise Effects on Bone Mineral Density, Falls, Coronary Risk Factors, and Health Care Costs in Older Women The Randomized Controlled Senior Fitness and Prevention (SEFIP) Study. Archives of Internal Medicine. 2010;**170**(2):179-85.

26. Beck BR, Norling TL. The effect of 8 mos of twice-weekly low- or higher intensity whole body vibration on risk factors for postmenopausal hip fracture. American Journal of Physical Medicine & Rehabilitation. 2010;**89**(12):997-1009.

27. Bebenek M, Kemmler W, von Stengel S, Engelke K, Kalender WA. Effect of exercise and Cimicifuga racemosa (CR BNO 1055) on bone mineral density, 10-year coronary heart disease risk, and menopausal complaints: the randomized controlled Training and Cimicifuga racemosa Erlangen (TRACE) study. Menopause. 2010;**17**(4):791-800.

28. Chuin A, Labonte M, Tessier D, Khalil A, Bobeuf F, Doyon CY, et al. Effect of antioxidants combined to resistance training on BMD in elderly women: a pilot study. Osteoporosis International. 2009;**20**(7):1253-8.

29. Bocalini DS, Serra AJ, dos Santos L, Murad N, Levy RF. Strength training preserves the bone mineral density of postmenopausal women without hormone replacement therapy. Journal of Aging & Health. 2009;**21**(3):519-27.

30. Park H, Kim KJ, Komatsu T, Park SK, Mutoh Y. Effect of combined exercise training on bone, body balance, and gait ability: a randomized controlled study in community-dwelling elderly women. J Bone Miner Metab. 2008;**26**(3):254-9.

31. Bergstrom I, Landgren B, Brinck J, Freyschuss B. Physical training preserves bone mineral density in postmenopausal women with forearm fractures and low bone mineral density. Osteoporosis International. 2008;**19**(2):177-83.

32. Young CM, Weeks BK, Beck BR. Simple, novel physical activity maintains proximal femur bone mineral density, and improves muscle strength and balance in sedentary, postmenopausal Caucasian women. Osteoporosis International. 2007;**18**(10):1379-87.

33. Woo J, Hong A, Lau E, Lynn H. A randomised controlled trial of Tai Chi and resistance exercise on bone health, muscle strength and balance in community-living elderly people. Age and Ageing. 2007;**36**(3):262-68.

34. Maddalozzo GF, Widrick JJ, Cardinal BJ, Winters-Stone KM, Hoffman MA, Snow CM. The effects of hormone replacement therapy and resistance training on spine bone mineral density in early postmenopausal women. Bone. 2007;**40**(5):1244-51.

35. Evans EM, Racette SB, Van Pelt RE, Peterson LR, Villareal DT. Effects of soy protein isolate and moderate exercise on bone turnover and bone mineral density in postmenopausal women. Menopause. 2007;**14**(3 Pt 1):481-8.

36. Wu J, Oka J, Higuchi M, Tabata I, Toda T, Fujioka M, et al. Cooperative effects of isoflavones and exercise on bone and lipid metabolism in postmenopausal Japanese women: a randomized placebo-controlled trial. Metabolism: Clinical & Experimental. 2006;**55**(4):423-33.

37. Korpelainen R, Keinanen-Kiukaanniemi S, Heikkinen J, Vaananen K, Korpelainen J. Effect of impact exercise on bone mineral density in elderly women with low BMD: a population-based randomized controlled 30-month intervention. Osteoporosis International. 2006;**17**(1):109-18.

38. Gusi N, Raimundo A, Leal A. Low-frequency vibratory exercise reduces the risk of bone fracture more than walking: a randomized controlled trial. BMC Musculoskeletal Disorders. 2006;**7**:92.

39. Englund U, Littbrand H, Sondell A, Pettersson U, Bucht G. A 1-year combined weight-bearing training program is beneficial for bone mineral density and neuromuscular function in older women. Osteoporosis International. 2005;**16**(9):1117-23.

40. Verschueren SMP, Roelants M, Delecluse C, Swinnen S, Vanderschueren D, Boonen S. Effect of 6-month whole body vibration training on hip density, muscle strength, and postural control in postmenopausal women: a randomized controlled pilot study. Journal of Bone & Mineral Research. 2004;**19**(3):352-9.

41. Liu-Ambrose TYL, Khan KM, Eng JJ, Heinonen A, McKay HA. Both resistance and agility training increase cortical bone density in 75-to 85-year-old women with low bone mass - A 6-month randomized controlled trial. Journal of Clinical Densitometry. 2004;**7**(4):390-98.

42. Chan K, Qin L, Lau M, Woo J, Au S, Choy W, et al. A randomized, prospective study of the effects of Tai Chi Chun exercise on bone mineral density in postmenopausal women. Archives of Physical Medicine & Rehabilitation. 2004;**85**(5):717-22.

43. Milliken LA, Going SB, Houtkooper LB, Flint-Wagner HG, Figueroa A, Metcalfe LL, et al. Effects of exercise training on bone remodeling, insulin-like growth factors, and bone mineral density in postmenopausal women with and without hormone replacement therapy. Calcified Tissue International. 2003;**72**(4):478-84.

44. Jessup JV, Horne C, Vishen RK, Wheeler D. Effects of exercise on bone density, balance, and self-efficacy in older women. Biol Res Nurs. 2003;**4**(3):171-80.

45. Going S, Lohman T, Houtkooper L, Metcalfe L, Flint-Wagner H, Blew R, et al. Effects of exercise on bone mineral density in calcium-replete postmenopausal women with and without hormone replacement therapy. Osteoporosis International. 2003;**14**(8):637-43.

46. Hans D, Genton L, Drezner MK, Schott AM, Pacifici R, Avioli L, et al. Monitored impact loading of the hip: initial testing of a home-use device. Calcified Tissue International. 2002;**71**(2):112-20.

47. Chilibeck PD, Davison KS, Whiting SJ, Suzuki Y, Janzen CL, Peloso P. The effect of strength training combined with bisphosphonate (etidronate) therapy on bone mineral, lean tissue, and fat mass in postmenopausal women. Canadian Journal of Physiology & Pharmacology. 2002;**80**(10):941-50.

48. Kerr D, Ackland T, Maslen B, Morton A, Prince R. Resistance training over 2 years increases bone mass in calcium-replete postmenopausal women. Journal of Bone & Mineral Research. 2001;**16**(1):175-81.

49. Iwamoto J, Takeda T, Ichimura S. Effect of exercise training and detraining on bone mineral density in postmenopausal women with osteoporosis. Journal of Orthopaedic Science. 2001;**6**(2):128-32.

50. Rhodes EC, Martin AD, Taunton JE, Donnelly M, Warren J, Elliot J. Effects of one year of resistance training on the relation between muscular strength and bone density in elderly women. British Journal of Sports Medicine. 2000;**34**(1):18-22.

51. Bemben DA, Fetters NL, Bemben MG, Nabavi N, Koh ET. Musculoskeletal responses to high- and low-intensity resistance training in early postmenopausal women. Medicine & Science in Sports & Exercise. 2000;**32**(11):1949-57.

52. Tsuritani I, Brooke-Wavell KS, Mastana SS, Jones PR, Hardman AE, Yamada Y. Does vitamin D receptor polymorphism influence the response of bone to brisk walking in postmenopausal women? Hormone Research. 1998;**50**(6):315-9.

53. Ebrahim S, Thompson PW, Baskaran V, Evans K. Randomized placebo-controlled trial of brisk walking in the prevention of postmenopausal osteoporosis. Age & Ageing. 1997;**26**(4):253-60.

54. Brooke-Wavell K, Jones PR, Hardman AE. Brisk walking reduces calcaneal bone loss in post-menopausal women. Clinical Science. 1997;**92**(1):75-80.

55. Lord SR, Ward JA, Williams P, Zivanovic E. The effects of a community exercise program on fracture risk factors in older women. Osteoporosis International. 1996;**6**(5):361-7.

56. Kerr D, Morton A, Dick I, Prince R. Exercise effects on bone mass in postmenopausal women are site-specific and load-dependent. Journal of Bone & Mineral Research. 1996;**11**(2):218-25.

57. Pruitt LA, Taaffe DR, Marcus R. Effects of a One-Year High-Intensity Versus Low-Intensity Resistance Training-Program on Bone-Mineral Density in Older Women. Journal of Bone and Mineral Research. 1995;**10**(11):1788-95.

58. Prince R, Devine A, Dick I, Criddle A, Kerr D, Kent N, et al. The effects of calcium supplementation (milk powder or tablets) and exercise on bone density in postmenopausal women. Journal of Bone & Mineral Research. 1995;**10**(7):1068-75.

59. Nichols JF, Nelson KP, Peterson KK, Sartoris DJ. Bone-Mineral Density Responses to High-Intensity Strength Training in Active Older Women. Journal of Aging and Physical Activity. 1995;**3**(1):26-38.

60. Bassey EJ, Ramsdale SJ. Weight-bearing exercise and ground reaction forces: a 12-month randomized controlled trial of effects on bone mineral density in healthy postmenopausal women. Bone. 1995;**16**(4):469-76.

61. Nelson ME, Fiatarone MA, Morganti CM, Trice I, Greenberg RA, Evans WJ. Effects of high-intensity strength training on multiple risk factors for osteoporotic fractures. A randomized controlled trial. JAMA. 1994;**272**(24):1909-14.

62. Martin D, Notelovitz M. Effects of aerobic training on bone mineral density of postmenopausal women. J Bone Miner Res. 1993;**8**(8):931-6.

63. Hatori M, Hasegawa A, Adachi H, Shinozaki A, Hayashi R, Okano H, et al. The effects of walking at the anaerobic threshold level on vertebral bone loss in postmenopausal women. Calcified Tissue International. 1993;**52**(6):411-4.

64. Lau EMC, Woo J, Leung PC, Swaminathan R, Leung D. The Effects of Calcium Supplementation and Exercise on Bone-Density in Elderly Chinese Women. Osteoporosis International. 1992;**2**(4):168-73.

65. Grove KA, Londeree BR. Bone density in postmenopausal women: high impact vs low impact exercise. Medicine & Science in Sports & Exercise. 1992;**24**(11):1190-4.

66. Sinaki M, Wahner HW, Offord KP, Hodgson SF. Efficacy of nonloading exercises in prevention of vertebral bone loss in postmenopausal women: a controlled trial. Mayo Clinic Proceedings. 1989;**64**(7):762-9.

**2.2 list of excluded studies**

**Not randomized trials (n=50) :**

1. Yu, P.A., et al., *The effects of high impact exercise intervention on bone mineral density, physical fitness, and quality of life in postmenopausal women with osteopenia: A retrospective cohort study.* Medicine, 2019. **98**(11).

2. Yamazaki, S., et al., *Effect of walking exercise on bone metabolism in postmenopausal women with osteopenia/osteoporosis.* J Bone Miner Metab, 2004. **22**(5): p. 500-8.

3. Walker, M., et al., *Longitudinal evaluation of supervised versus unsupervised exercise programs for the treatment of osteoporosis.* European Journal of Applied Physiology, 2000. **83**(4-5): p. 349-355.

4. Villareal, D.T., et al., *Effects of exercise training added to ongoing hormone replacement therapy on bone mineral density in frail elderly women.* Journal of the American Geriatrics Society, 2003. **51**(7): p. 985-90.

5. Villalon, K.L., et al., *A losing battle: weight regain does not restore weight loss-induced bone loss in postmenopausal women.* Obesity, 2011. **19**(12): p. 2345-50.

6. Uusi-Rasi, K., et al., *Long-term recreational gymnastics, estrogen use, and selected risk factors for osteoporotic fractures.* Journal of Bone and Mineral Research, 1999. **14**(7): p. 1231-1238.

7. Thorsen, K., A. Kristoffersson, and R. Lorentzon, *The effects of brisk walking on markers of bone and calcium metabolism in postmenopausal women.* Calcified Tissue International, 1996. **58**(4): p. 221-225.

8. Thompson, J.L., et al., *Effects of diet and exercise on energy expenditure in postmenopausal women.* American Journal of Clinical Nutrition, 1997. **66**(4): p. 867-73.

9. Tabor, E., et al., *The role of physical activity in early adulthood and middle-age on bone health after menopause in epidemiological population from Silesia Osteo Active Study.* International Journal of Clinical Practice, 2016. **70**(10): p. 835-842.

10. Suominen, H., *Muscle training for bone strength.* Aging Clinical and Experimental Research, 2006. **18**(2): p. 85-93.

11. Snow, C.M., et al., *Long-term exercise using weighted vests prevents hip bone loss in postmenopausal women.* Journals of Gerontology Series a-Biological Sciences and Medical Sciences, 2000. **55**(9): p. M489-M491.

12. Silverman, N.E., B.J. Nicklas, and A.S. Ryan, *Addition of aerobic exercise to a weight loss program increases BMD, with an associated reduction in inflammation in overweight postmenopausal women.* Calcified Tissue International, 2009. **84**(4): p. 257-65.

13. Shaw, J.M. and C.M. Snow, *Weighted vest exercise improves indices of fall risk in older women.* Journals of Gerontology Series a-Biological Sciences and Medical Sciences, 1998. **53**(1): p. M53-M58.

14. Ryan, A.S., B.J. Nicklas, and K.E. Dennis, *Aerobic exercise maintains regional bone mineral density during weight loss in postmenopausal women.* J Appl Physiol (1985), 1998. **84**(4): p. 1305-10.

15. Rafiq, S., et al., *Role of Weight-Bearing Exercises in the Treatment of Post-Menopausal Osteoporosis.* Jcpsp, Journal of the College of Physicians & Surgeons - Pakistan, 2018. **28**(2): p. 122-125.

16. Qin, L., et al., *Regular Tai Chi Chuan exercise may retard bone loss in postmenopausal women: A case-control study.* Arch Phys Med Rehabil, 2002. **83**(10): p. 1355-9.

17. Nurzenski, M.K., et al., *Geometric indices of bone strength are associated with physical activity and dietary calcium intake in healthy older women.* Journal of Bone & Mineral Research, 2007. **22**(3): p. 416-24.

18. Ng, C.A., et al., *Feasibility, safety and effectiveness of a pilot 16-week home-based, impact exercise intervention in postmenopausal women with low bone mineral density.* Osteoporosis International, 2020. **07**: p. 07.

19. Nelson, M.E., et al., *A 1-y walking program and increased dietary calcium in postmenopausal women: effects on bone.* American Journal of Clinical Nutrition, 1991. **53**(5): p. 1304-11.

20. Miller, L.E., et al., *Bone mineral density in postmenopausal women - Does exercise training make a difference?* Physician and Sportsmedicine, 2004. **32**(2): p. 18-24.

21. McNamara, A. and K. Gunter, *The influence of participation in Better Bones and Balance (TM) on skeletal health: evaluation of a community-based exercise program to reduce fall and fracture risk.* Osteoporosis International, 2012. **23**(6): p. 1813-1822.

22. Marini, S., et al., *Proposal of an Adapted Physical Activity Exercise Protocol for Women with Osteoporosis-Related Vertebral Fractures: A Pilot Study to Evaluate Feasibility, Safety, and Effectiveness.* International Journal of Environmental Research & Public Health [Electronic Resource], 2019. **16**(14): p. 18.

23. Kudlacek, S., et al., *The impact of a senior dancing program on spinal and peripheral bone mass.* American Journal of Physical Medicine & Rehabilitation, 1997. **76**(6): p. 477-481.

24. Kohrt, W.M., A.A. Ehsani, and S.J. Birge, Jr., *Effects of exercise involving predominantly either joint-reaction or ground-reaction forces on bone mineral density in older women.* Journal of Bone & Mineral Research, 1997. **12**(8): p. 1253-61.

25. Kerschan-Schindl, K., et al., *Long-term home exercise program: Effect in women at high risk of fracture.* Archives of Physical Medicine and Rehabilitation, 2000. **81**(3): p. 319-323.

26. Kemmler, W., et al., *Exercise and fractures in postmenopausal women: 12-year results of the Erlangen Fitness and Osteoporosis Prevention Study (EFOPS).* Osteoporosis International, 2012. **23**(4): p. 1267-76.

27. Kemmler, W., et al., *Benefits of 2 years of intense exercise on bone density, physical fitness, and blood lipids in early postmenopausal osteopenic women - Results of the Erlangen Fitness Osteoporosis Preventation Study (EFOPS).* Archives of Internal Medicine, 2004. **164**(10): p. 1084-1091.

28. Kemmler, W., et al., *Physical training for fracture prophylaxis of the elderly: Evidence and training methodological implementation using the example of the Erlangen Fitness and Osteoporosis Prevention Study (EFOPS). [German].* Osteologie, 2019. **28**(3): p. 192-201.

29. Kemmler, W., et al., *The Erlangen Fitness Osteoporosis Prevention Study: a controlled exercise trial in early postmenopausal women with low bone density-first-year results.* Archives of Physical Medicine & Rehabilitation, 2003. **84**(5): p. 673-82.

30. Kemmler, W., et al., *Exercise and fractures in postmenopausal women. Final results of the controlled Erlangen Fitness and Osteoporosis Prevention Study (EFOPS).* Osteoporosis International, 2015. **26**(10): p. 2491-9.

31. Iwamoto, J., et al., *Effect of increased physical activity on bone mineral density in postmenopausal osteoporotic women.* Keio Journal of Medicine, 1998. **47**(3): p. 157-61.

32. Harrison, J.E., et al., *Evaluation of a Program for Rehabilitation of Osteoporotic Patients (Pro) - 4-Year Follow-Up.* Osteoporosis International, 1993. **3**(1): p. 13-17.

33. Giangregorio, L.M., et al., *Too Fit To Fracture: exercise recommendations for individuals with osteoporosis or osteoporotic vertebral fracture.* Osteoporosis International, 2014. **25**(3): p. 821-835.

34. Engelke, K., et al., *Exercise maintains bone density at spine and hip EFOPS: a 3-year longitudinal study in early postmenopausal women.* Osteoporosis International, 2006. **17**(1): p. 133-42.

35. Deng, S.L., *Muscle strength training helps to reduce bone loss in early postmenopausal women.* Science & Sports, 2013. **28**(5): p. 260-266.

36. Damilakis, J., et al., *Effect of lifetime occupational physical activity on indices of bone mineral status in healthy postmenopausal women.* Calcified Tissue International, 1999. **64**(2): p. 112-116.

37. Daly, R.M., R.L. Duckham, and J. Gianoudis, *Evidence for an Interaction Between Exercise and Nutrition for Improving Bone and Muscle Health.* Current Osteoporosis Reports, 2014. **12**(2): p. 219-226.

38. Dalsky, G.P., et al., *Weight-bearing exercise training and lumbar bone mineral content in postmenopausal women.* Annals of Internal Medicine, 1988. **108**(6): p. 824-8.

39. Chien, M.Y., et al., *Efficacy of a 24-week aerobic exercise program for osteopenic postmenopausal women.* Calcified Tissue International, 2000. **67**(6): p. 443-8.

40. Brubaker, M., P. Limburg, and M. Sinaki, *Site specificity of physical activity and its effect on long-term risk of fracture: Spine vs. Hip.* Journal of Bone and Mineral Research. Conference, 2012. **27**(SUPPL. 1).

41. Brooke-Wavell, K., et al., *Commencing, continuing and stopping brisk walking: effects on bone mineral density, quantitative ultrasound of bone and markers of bone metabolism in postmenopausal women.* Osteoporosis International, 2001. **12**(7): p. 581-7.

42. Borer, K.T., et al., *Walking intensity for postmenopausal bone mineral preservation and accrual.* Bone, 2007. **41**(4): p. 713-21.

43. Borba-Pinheiro, C.J., et al., *Combining Adapted Judo Training and pharmacological treatment to improve Bone Mineral Density on postmenopausal women: A two years study.* Archives of Budo, 2013. **9**(2): p. 93-99.

44. Bloomfield, S.A., et al., *Non-Weightbearing Exercise May Increase Lumbar Spine Bone-Mineral Density in Healthy Postmenopausal Women.* American Journal of Physical Medicine & Rehabilitation, 1993. **72**(4): p. 204-209.

45. Bemben, D.A., et al., *Effects of combined whole-body vibration and resistance training on muscular strength and bone metabolism in postmenopausal women.* Bone, 2010. **47**(3): p. 650-6.

46. Beavers, K.M., et al., *Change in Bone Mineral Density During Weight Loss with Resistance Versus Aerobic Exercise Training in Older Adults.* Journals of Gerontology Series a-Biological Sciences and Medical Sciences, 2017. **72**(11): p. 1582-1585.

47. Aubry-Rozier, B., et al., *Impact of physical activity on the musculoskeletal health evaluated with bone density, bone texture and body composition: The OsteoLaus Study.* Swiss Medical Weekly, 2017. **147 (Supplement 224)**: p. 4S-5S.

48. Aloia, J.F., et al., *Prevention of involutional bone loss by exercise.* Annals of Internal Medicine, 1978. **89**(3): p. 356-8.

49. Adami, S., et al., *Site-specific effects of strength training on bone structure and geometry of ultradistal radius in postmenopausal women.* Journal of Bone & Mineral Research, 1999. **14**(1): p. 120-4.

50. *Effects of Whole Body Vibration (WBV) on Musculoskeletal System of Aged Women.* https://clinicaltrials gov/show/NCT01982214, 2013.

**No relevant population (n=82):**

1. Zhao, J.X., L. Zhang, and Y. Tian, Effect of 6 months of Tai Chi Chuan and calcium supplementation on bone health in females aged 50-59 years. Journal of Exercise Science & Fitness, 2007. 5(2): p. 88-94.

2. Zha, D.S., et al., Does whole-body vibration with alternative tilting increase bone mineral density and change bone metabolism in senior people? Aging Clinical and Experimental Research, 2012. 24(1): p. 28-36.

3. Xiao, C.-M., Y. Kang, and Y.-C. Zhuang, Effects of Elastic Resistance Band Exercise on Postural Balance, Estrogen, Bone Metabolism Index, and Muscle Strength of Perimenopausal Period Women. Journal of the American Geriatrics Society, 2016. 64(6): p. 1368-70.

4. Welsh, L. and O.M. Rutherford, Hip bone mineral density is improved by high-impact aerobic exercise in postmenopausal women and men over 50 years. European Journal of Applied Physiology and Occupational Physiology, 1996. 74(6): p. 511-517.

5. Vuori, I., et al., Effects of Unilateral Strength Training and Detraining on Bone-Mineral Density and Content in Young-Women - a Study of Mechanical Loading and Deloading on Human Bones. Calcified Tissue International, 1994. 55(1): p. 59-67.

6. Villareal, D.T., et al., Effects of exercise training on bone mineral density in frail older women and men: a randomised controlled trial. Age & Ageing, 2004. 33(3): p. 309-12.

7. Vanni, A.C., et al., Comparison of the effects of two resistance training regimens on muscular and bone responses in premenopausal women. Osteoporosis International, 2010. 21(9): p. 1537-44.

8. Vainionpaa, A., et al., Effect of impact exercise and its intensity on bone geometry at weight-bearing tibia and femur. Bone, 2007. 40(3): p. 604-611.

9. Vainionpaa, A., et al., Effects of high-impact exercise on bone mineral density: a randomized controlled trial in premenopausal women. Osteoporosis International, 2005. 16(2): p. 191-7.

10. Vainionpaa, A., et al., Effect of impact exercise on physical performance and cardiovascular risk factors. Medicine and Science in Sports and Exercise, 2007. 39(5): p. 756-763.

11. Ubago-Guisado, E., et al., Effects of Zumba<sup> R</sup> and Aquagym on Bone Mass in Inactive Middle-Aged Women. Medicina, 2019. 55(1): p. 21.

12. Tucker, L.A., et al., Effect of two jumping programs on hip bone mineral density in premenopausal women: a randomized controlled trial. American Journal of Health Promotion, 2015. 29(3): p. 158-64.

13. Thomas, D.T., L. Wideman, and C.A. Lovelady, Effects of calcium and resistance exercise on body composition in overweight premenopausal women. Journal of the American College of Nutrition, 2010. 29(6): p. 604-11.

14. Tan, A.M., et al., Efficacy of a workplace osteoporosis prevention intervention: a cluster randomized trial. Bmc Public Health, 2016. 16.

15. Soomro, R.R., et al., Comparing the effects of Osteoporosis Prevention Exercise Protocol (OPEP) versus walking in the prevention of osteoporosis in younger females. Pakistan Journal of Medical Sciences, 2015. 31(2): p. 336-340.

16. Sinaki, M., et al., Three-year controlled, randomized trial of the effect of dose-specified loading and strengthening exercises on bone mineral density of spine and femur in nonathletic, physically active women. Bone, 1996. 19(3): p. 233-244.

17. Shea, K.L., et al., Body composition and bone mineral density after ovarian hormone suppression with or without estradiol treatment. Menopause, 2015. 22(10): p. 1045-1052.

18. Shanb, A.A., et al., Whole body vibration versus magnetic therapy on bone mineral density in elderly osteoporotic individuals. Journal of Back and Musculoskeletal Rehabilitation, 2017. 30(4): p. 903-912.

19. Olson, A.C.F., Promoting perimenopausal bone health: What's theory got to do with it? Journal of Clinical Densitometry, 2010. 13 (1): p. 110.

20. Moradell, A., et al., Role of Dietary Intake and Serum 25(OH)D on the Effects of a Multicomponent Exercise Program on Bone Mass and Structure of Frail and Pre-Frail Older Adults. Nutrients, 2020. 12(10).

21. Mohr, M., et al., Effects of soccer vs swim training on bone formation in sedentary middle-aged women. European Journal of Applied Physiology, 2015. 115(12): p. 2671-9.

22. Milanese, C., et al., Effects of Whole-Body Vibration With or Without Localized Radiofrequency on Anthropometry, Body Composition, and Motor Performance in Young Nonobese Women. Journal of Alternative and Complementary Medicine, 2012. 18(1): p. 69-75.

23. McCartney, N., et al., Long-Term Resistance Training in the Elderly - Effects on Dynamic Strength, Exercise Capacity, Muscle, and Bone. Journals of Gerontology Series a-Biological Sciences and Medical Sciences, 1995. 50(2): p. B97-B104.

24. Marchese, D., et al., Effects of a Weight-Bearing Exercise Training on Bone Mineral Density and Neuromuscular Function of Osteopenic Women. European Journal of Inflammation, 2012. 10(3): p. 427-435.

25. Lohman, T., et al., Effects of resistance training on regional and total bone mineral density in premenopausal women: a randomized prospective study. Journal of Bone & Mineral Research, 1995. 10(7): p. 1015-24.

26. Liang, M.T.C., et al., Effect of high-impact aerobics and strength training on BMD in young women aged 20-35 years. International Journal of Sports Medicine, 2011. 32(2): p. 100-8.

27. Kontulainen, S., et al., Former exercisers of an 18-month intervention display residual aBMD benefits compared with control women 3.5 years post-intervention: a follow-up of a randomized controlled high-impact trial. Osteoporosis International, 2004. 15(3): p. 248-51.

28. Knobf, M.T., et al., Effect of a randomized controlled exercise trial on bone outcomes: influence of adjuvant endocrine therapy. Breast Cancer Research & Treatment, 2016. 155(3): p. 491-500.

29. Kim, S., et al., Effects of an 8-Month Ashtanga-Based Yoga Intervention on Bone Metabolism in Middle-Aged Premenopausal Women: A Randomized Controlled Study. Journal of Sports Science and Medicine, 2015. 14(4): p. 756-768.

30. Josse, A.R., et al., Body Composition and Strength Changes in Women with Milk and Resistance Exercise. Medicine and Science in Sports and Exercise, 2010. 42(6): p. 1122-1130.

31. Jiang, J., et al., The effects of improved metabolic risk factors on bone turnover markers after 12 weeks of simvastatin treatment with or without exercise. Metabolism-Clinical and Experimental, 2014. 63(11): p. 1398-1408.

32. Itoi, E. and M. Sinaki, Effect of Back-Strengthening Exercise on Posture in Healthy Women 49 to 65 Years of Age. Mayo Clinic Proceedings, 1994. 69(11): p. 1054-1059.

33. Huuskonen, J., et al., Regular physical exercise and bone mineral density: A four-year controlled randomized trial in middle-aged men. The DNASCO study. Osteoporosis International, 2001. 12(5): p. 349-355.

34. Hui, S.S.C., et al., Effects of Tai Chi and Walking Exercises on Weight Loss, Metabolic Syndrome Parameters, and Bone Mineral Density: A Cluster Randomized Controlled Trial. Evidence-Based Complementary and Alternative Medicine, 2015. 2015.

35. Hourigan, S.R., et al., Positive effects of exercise on falls and fracture risk in osteopenic women. Osteoporosis International, 2008. 19(7): p. 1077-1086.

36. Hirosaki, M., et al., Effects of a laughter and exercise program on physiological and psychological health among community-dwelling elderly in Japan: Randomized controlled trial. Geriatrics & Gerontology International, 2013. 13(1): p. 152-160.

37. Hinton, P.S., et al., Weight-loss-associated changes in bone mineral density and bone turnover after partial weight regain with or without aerobic exercise in obese women. European Journal of Clinical Nutrition, 2012. 66(5): p. 606-612.

38. Hinton, P.S., et al., Total body bone mineral content and density during weight loss and maintenance on a low- or recommended-dairy weight-maintenance diet in obese men and women. European Journal of Clinical Nutrition, 2010. 64(4): p. 392-399.

39. Helge, E.W., et al., Recreational football training decreases risk factors for bone fractures in untrained premenopausal women. Scandinavian Journal of Medicine & Science in Sports, 2010. 20: p. 31-39.

40. Heinonen, A., et al., Effect of two training regimens on bone mineral density in healthy perimenopausal women: a randomized controlled trial. Journal of Bone & Mineral Research, 1998. 13(3): p. 483-90.

41. Heinonen, A., et al., Effects of High-Impact Training and Detraining on Femoral Neck Structure in Premenopausal Women: A Hip Structural Analysis of an 18-Month Randomized Controlled Exercise Intervention with 3.5-Year Follow-Up. Physiotherapy Canada, 2012. 64(1): p. 98-105.

42. Heinonen, A., et al., Good maintenance of high-impact activity-induced bone gain by voluntary, unsupervised exercises: An 8-month follow-up of a randomized controlled trial. Journal of Bone & Mineral Research, 1999. 14(1): p. 125-8.

43. Heinonen, A., et al., Randomised controlled trial of effect of high-impact exercise on selected risk factors for osteoporotic fractures. Lancet, 1996. 348(9038): p. 1343-1347.

44. Greenway, K.G., J.W. Walkley, and P.A. Rich, Impact exercise and bone density in premenopausal women with below average bone density for age. European Journal of Applied Physiology, 2015. 115(11): p. 2457-69.

45. Greendale, G.A., et al., A randomized trial of weighted vest use in ambulatory older adults: Strength, performance, and quality of life outcomes. Journal of the American Geriatrics Society, 2000. 48(3): p. 305-311.

46. Gomez-Cabello, A., et al., Effects of a short-term whole body vibration intervention on bone mass and structure in elderly people. Journal of Science and Medicine in Sport, 2014. 17(2): p. 160-164.

47. Gianoudis, J., et al., Effects of a Targeted Multimodal Exercise Program Incorporating High-Speed Power Training on Falls and Fracture Risk Factors in Older Adults: A Community-Based Randomized Controlled Trial. Journal of Bone and Mineral Research, 2014. 29(1): p. 182-191.

48. Gaines, J.M., M. Narrett, and J.M. Parrish, The Effect of the Addition of Osteoporosis Education to a Bone Health Screening Program for Older Adults. Geriatric Nursing, 2010. 31(5): p. 348-360.

49. Gaba, A., et al., The effect of brisk walking on postural stability, bone mineral density, body weight and composition in women over 50 years with a sedentary occupation: a randomized controlled trial. Bmc Womens Health, 2016. 16.

50. Friedlander, A.L., et al., A 2-Year Program of Aerobics and Weight Training Enhances Bone-Mineral Density of Young-Women. Journal of Bone and Mineral Research, 1995. 10(4): p. 574-585.

51. Evans, W.J., Effects of exercise on body composition and functional capacity of the elderly. Journals of Gerontology Series A-Biological Sciences & Medical Sciences, 1995. 50 Spec No: p. 147-50.

52. Duckham, R.L., et al., Randomised controlled trial of the effectiveness of community group and home-based falls prevention exercise programmes on bone health in older people: the ProAct65+bone study. Age and Ageing, 2015. 44(4): p. 573-579.

53. Dornemann, T.M., et al., Effects of high-intensity resistance exercise on bone mineral density and muscle strength of 40-50-year-old women. Journal of Sports Medicine & Physical Fitness, 1997. 37(4): p. 246-51.

54. de Jong, N., et al., Dietary supplements and physical exercise affecting bone and body composition in frail elderly persons. American Journal of Public Health, 2000. 90(6): p. 947-954.

55. Daly, R.M., et al., Effects of a 12-Month Supervised, Community-Based, Multimodal Exercise Program Followed by a 6-Month Research-to-Practice Transition on Bone Mineral Density, Trabecular Microarchitecture, and Physical Function in Older Adults: A Randomized Controlled Trial. Journal of Bone and Mineral Research, 2020. 35(3): p. 419-429.

56. Corrie, H., et al., Effects of vertical and side-alternating vibration training on fall risk factors and bone turnover in older people at risk of falls. Age and Ageing, 2015. 44(1): p. 115-122.

57. Colleran, H.L., L. Wideman, and C.A. Lovelady, Effects of Energy Restriction and Exercise on Bone Mineral Density during Lactation. Medicine and Science in Sports and Exercise, 2012. 44(8): p. 1570-1579.

58. Coll-Risco, I., et al., Body Composition Changes Following a Concurrent Exercise Intervention in Perimenopausal Women: The FLAMENCO Project Randomized Controlled Trial. Journal of Clinical Medicine, 2019. 8(10).

59. Blumenthal, J.A., et al., Effects of Exercise Training on Bone-Density in Older Men and Women. Journal of the American Geriatrics Society, 1991. 39(11): p. 1065-1070.

60. Bergstrom, I., B. Freyschuss, and B.-M. Landgren, Physical training and hormone replacement therapy reduce the decrease in bone mineral density in perimenopausal women: a pilot study. Osteoporosis International, 2005. 16(7): p. 823-8.

61. Bemben, D.A. and M.G. Bemben, Dose-response effect of 40 weeks of resistance training on bone mineral density in older adults. Osteoporosis International, 2011. 22(1): p. 179-86.

62. Beavers, K.M., et al., Effect of Exercise Modality During Weight Loss on Bone Health in Older Adults With Obesity and Cardiovascular Disease or Metabolic Syndrome: A Randomized Controlled Trial. Journal of Bone and Mineral Research, 2018. 33(12): p. 2140-2149.

63. Bailey, C.A. and K. Brooke-Wavell, Daily exercise is most effective for increasing hip bone mineral density: A randomized high-impact, unilateral intervention. Bone, 2009. 44: p. S100-S101.

64. Babatunde, O. and J. Forsyth, Effects of lifestyle exercise on premenopausal bone health: a randomised controlled trial. Journal of Bone & Mineral Metabolism, 2014. 32(5): p. 563-72.

65. Al Mulhim, A.A., et al., Effect of exercise program on the bone mineral density in sedentary females. Bahrain Medical Bulletin, 2004. 26(2): p. 42-44.

66. Ahola, R., et al., Time-course of exercise and its association with 12-month bone changes. Bmc Musculoskeletal Disorders, 2009. 10.

67. Effects of Zumba(R) and Aquagym on Bone Mass in Inactive Middle-Aged Women. Medicina, 2019. 55(1).

68. Effects of an Exercise Program on Bone Density. https://clinicaltrials gov/show/NCT03308292, 2017.

69. The Flamenco (Fitness League Against MENopause COsts) Project. https://clinicaltrials gov/show/NCT02358109, 2014.

70. Effect of eight weeks aerobic training on serum parathormone, estrogen and alkaline phosphatase concentration in obese women with premature menopause. Iranian journal of obstetrics, gynecology and infertility. 20(7): p. 8-17.

71. Choquette, S., et al., Effects of soya isoflavones and exercise on body composition and clinical risk factors of cardiovascular diseases in overweight postmenopausal women: a 6-month double-blind controlled trial. British Journal of Nutrition, 2011. 105(8): p. 1199-209.

72. Banitalebi, E., et al., Osteosarcopenic obesity markers following elastic band resistance training: A randomized controlled trial. Experimental Gerontology, 2020. 135.

73. Svendsen, O.L., C. Hassager, and C. Christiansen, Physical exercise as a supplement to diet. Effect on body composition, resting metabolic rate and cardiovascular risk factors in postmenopausal overweight women. [Danish]. Ugeskrift for laeger, 1994. 156(41): p. 6035-6038.

74. Svendsen, O.L., C. Hassager, and C. Christiansen, Effect of an energy-restrictive diet, with or without exercise, on lean tissue mass, resting metabolic rate, cardiovascular risk factors, and bone in overweight postmenopausal women. American Journal of Medicine, 1993. 95(2): p. 131-40.

75. Murtezani, A., et al., The effect of land versus aquatic exercise program on bone mineral density and physical function in postmenopausal women with osteoporosis: a randomized controlled trial. Ortopedia Traumatologia Rehabilitacja, 2014. 16(3): p. 319-25.

76. Metcalfe, L., et al., Postmenopausal Women and Exercise for Prevention of Osteoporosis: The Bone, Estrogen, Strength Training (BEST) Study. ACSM's Health & Fitness Journal, 2001. 5(3): p. 6-14.

77. Marin-Cascales, E., J.A. Rubio-Arias, and P.E. Alcaraz, Effects of Two Different Neuromuscular Training Protocols on Regional Bone Mass in Postmenopausal Women: A Randomized Controlled Trial. Frontiers in Physiology, 2019. 10: p. 846.

78. Hosny, I.A., et al., Beneficial impact of aerobic exercises on bone mineral density in obese premenopausal women under caloric restriction. Skeletal Radiology, 2012. 41(4): p. 423-7.

79. Chubak, J., et al., Effect of exercise on bone mineral density and lean mass in postmenopausal women. Medicine & Science in Sports & Exercise, 2006. 38(7): p. 1236-44.

80. Chao, D., et al., Effect of voluntary weight loss on bone mineral density in older overweight women. Journal of the American Geriatrics Society, 2000. 48(7): p. 753-9.

81. Bocalini, D.S., A.J. Serra, and L. Dos Santos, Moderate resistive training maintains bone mineral density and improves functional fitness in postmenopausal women. Journal of Aging Research, 2010. 2010: p. 760818.

82. Aboarrage Junior, A.M., et al., A High-Intensity Jump-Based Aquatic Exercise Program Improves Bone Mineral Density and Functional Fitness in Postmenopausal Women. Rejuvenation Research, 2018. 21(6): p. 535-540.

**No relevant intervention (n=21):**

1. Saggini, R., et al., Effect of combined treatment with focused mechano-acoustic vibration and pharmacological therapy on bone mineral density and muscle strength in post-menopausal women. Clinical Cases in Mineral and Bone Metabolism, 2017. 14(3): p. 305-311.

2. Razzak, Z.A., A.A. Khan, and S.I. Farooqui, Effect of aerobic and anaerobic exercise on estrogen level, fat mass, and muscle mass among postmenopausal osteoporotic females. International Journal of Health Sciences, 2019. 13(4): p. 10-16.

3. Watson, S.L., et al., High-Intensity Resistance and Impact Training Improves Bone Mineral Density and Physical Function in Postmenopausal Women With Osteopenia and Osteoporosis: The LIFTMOR Randomized Controlled Trial. Journal of Bone & Mineral Research, 2018. 33(2): p. 211-220.

4. Tankisheva, E., et al., Effects of a Six-Month Local Vibration Training on Bone Density, Muscle Strength, Muscle Mass, and Physical Performance in Postmenopausal Women. Journal of Strength & Conditioning Research, 2015. 29(9): p. 2613-22.

5. Stengel, S.V., et al., Power training is more effective than strength training for maintaining bone mineral density in postmenopausal women. Journal of Applied Physiology, 2005. 99(1): p. 181-8.

6. Smidt, G.L., et al., The effect of high-intensity trunk exercise on bone mineral density of postmenopausal women. Spine, 1992. 17(3): p. 280-5.

7. Pernambuco, C.S., et al., Functional autonomy, bone mineral density (BMD) and serum osteocalcin levels in older female participants of an aquatic exercise program (AAG). Archives of Gerontology & Geriatrics, 2013. 56(3): p. 466-71.

8. Nawrat-Szoltysik, A.J., et al., Effect of physical activity on the sequelae of osteoporosis in female residents of residential care facilities. Advances in Clinical and Experimental Medicine, 2018. 27(5): p. 633-642.

9. Maddalozzo, G.F. and C.M. Snow, High intensity resistance training: effects on bone in older men and women. Calcified Tissue International, 2000. 66(6): p. 399-404.

10. Jepsen, D.B., et al., The combined effect of Parathyroid hormone (1-34) and whole-body Vibration exercise in the treatment of postmenopausal OSteoporosis (PaVOS study): a randomized controlled trial. Osteoporosis International, 2019. 30(9): p. 1827-1836.

11. Iwamoto, J., et al., Effect of whole-body vibration exercise on lumbar bone mineral density, bone turnover, and chronic back pain in post-menopausal osteoporotic women treated with alendronate. Aging-Clinical & Experimental Research, 2005. 17(2): p. 157-63.

12. Hakestad, K.A., et al., Effect of exercises with weight vests and a patient education programme for women with osteopenia and a healed wrist fracture: a randomized, controlled trial of the OsteoACTIVE programme. BMC Musculoskeletal Disorders, 2015. 16: p. 352.

13. Brentano, M.A., et al., Physiological adaptations to strength and circuit training in postmenopausal women with bone loss. Journal of Strength & Conditioning Research, 2008. 22(6): p. 1816-25.

14. Bravo, G., et al., Impact of a 12-month exercise program on the physical and psychological health of osteopenic women. Journal of the American Geriatrics Society, 1996. 44(7): p. 756-62.

15. Borba-Pinheiro, C.J., et al., Resistance training programs on bone related variables and functional independence of postmenopausal women in pharmacological treatment: A randomized controlled trial. Archives of Gerontology & Geriatrics, 2016. 65: p. 36-44.

16. Borba-Pinheiro, C.J., et al., Adapted combat sports on bone related variables and functional independence of postmenopausal women in pharmacological treatment: a clinical trial study. Archives of Budo, 2016. 12: p. 187-199.

17. Borba-Pinheiro, C.J., et al., Effects of Resistance Training on Low Bone Density-Related Variables in Menopausal Women Taking Alendronate. Revista Brasileira De Medicina Do Esporte, 2010. 16(2): p. 121-125.

18. Watson, S., et al., Supervised high intensity resistance and impact training does not cause vertebral crush fractures and improves thoracic kyphosis in postmenopausal women with low to very low bone mass: The LIFTMOR Trial. Journal of Bone and Mineral Research, 2018. 33 (Supplement 1): p. 402-403.

19. Gibson, A.A., et al., Fast versus slow weight loss: development process and rationale behind the dietary interventions for the TEMPO Diet Trial. Obesity Science & Practice, 2016. 2(2): p. 162-173.

20. Elsisi, H., G.S.M. Mousa, and M.T.M. Eldesoky, Electromagnetic field versus circuit weight training on bone mineral density in elderly women. Clinical Interventions in Aging, 2015. 10: p. 539-548.

21. Chilibeck, P.D., et al., Effects of Creatine and Resistance Training on Bone Health in Postmenopausal Women. Medicine & Science in Sports & Exercise, 2015. 47(8): p. 1587-95.

**Intervention duration＜6 months (n=6)：**

1. Pinho, J.P., et al., A High-Intensity Exercise Intervention Improves Older Women Lumbar Spine and Distal Tibia Bone Microstructure and Function: A 20-Week Randomized Controlled Trial. Ieee Journal of Translational Engineering in Health and Medicine-Jtehm, 2020. 8.

2. Khan, A.A., et al., Effects of osteoanabolic exercises on bone mineral density of osteoporotic females: A randomized controlled trial. International Journal of Health Sciences, 2019. 13(1): p. 9-13.

3. Bassey, E.J., et al., Pre- and postmenopausal women have different bone mineral density responses to the same high-impact exercise. J Bone Miner Res, 1998. 13(12): p. 1805-13.

4. Wen, H.J., et al., Effects of short-term step aerobics exercise on bone metabolism and functional fitness in postmenopausal women with low bone mass. Osteoporosis International, 2017. 28(2): p. 539-547.

5. Movassagbehestani, M., Effects of a 12-week aerobic exercise on back spine and thigh bone mineral density in heavy women after menopause. Biosciences Biotechnology Research Asia, 2012. 9(1): p. 149-156.

6. Mosti, M.P., et al., Maximal strength training in postmenopausal women with osteoporosis or osteopenia. Journal of Strength & Conditioning Research, 2013. 27(10): p. 2879-86.

**No relevant outcome (n=20):**

1. Multanen, J., et al., Effects of high-impact training on bone and articular cartilage: 12-month randomized controlled quantitative MRI study. Journal of Bone & Mineral Research, 2014. 29(1): p. 192-201.

2. Karinkanta, S., et al., A multi-component exercise regimen to prevent functional decline and bone fragility in home-dwelling elderly women: randomized, controlled trial. Osteoporosis International, 2007. 18(4): p. 453-62.

3. Karinkanta, S., et al., Maintenance of exercise-induced benefits in physical functioning and bone among elderly women. Osteoporosis International, 2009. 20(4): p. 665-674.

4. Kang, J.-I., D.-K. Jeong, and H. Choi, The effects of trunk stabilization exercise on bone density after menopause. Journal of Physical Therapy Science, 2015. 27(12): p. 3869-72.

5. Boggild, M., et al., Effect of 1 year of whole-body vibration therapy on muscle density and volume in postmenopausal women: The vibration study. Journal of Bone and Mineral Research. Conference, 2013. 28(SUPPL. 1).

6. Ashe, M.C., et al., Does frequency of resistance training affect tibial cortical bone density in older women? A randomized controlled trial. Osteoporosis International, 2013. 24(2): p. 623-32.

7. von Stengel, S., et al., Differential effects of strength versus power training on bone mineral density in postmenopausal women: a 2-year longitudinal study. British Journal of Sports Medicine, 2007. 41(10): p. 649-55; discussion 655.

8. Uusi-Rasi, K., et al., Effect of discontinuation of alendronate treatment and exercise on bone mass and physical fitness: 15-month follow-up of a randomized, controlled trial. Bone, 2004. 35(3): p. 799-805.

9. Uusi-Rasi, K., et al., Effect of alendronate and exercise on bone and physical performance of postmenopausal women: a randomized controlled trial. Bone, 2003. 33(1): p. 132-43.

10. Russo, C.R., et al., High-Frequency Vibration Training Increases Muscle Power in Postmenopausal Women. Archives of Physical Medicine and Rehabilitation, 2003. 84(12): p. 1854-1857.

11. Rubin, C., et al., Prevention of postmenopausal bone loss by a low-magnitude, high-frequency mechanical stimuli: a clinical trial assessing compliance, efficacy, and safety. Journal of Bone & Mineral Research, 2004. 19(3): p. 343-51.

12. Revel, M., et al., One-year psoas training can prevent lumbar bone loss in postmenopausal women: a randomized controlled trial. Calcified Tissue International, 1993. 53(5): p. 307-11.

13. McMurdo, M.E., P.A. Mole, and C.R. Paterson, Controlled trial of weight bearing exercise in older women in relation to bone density and falls. BMJ, 1997. 314(7080): p. 569.

14. Leung, K.S., et al., Effects of 18-month low-magnitude high-frequency vibration on fall rate and fracture risks in 710 community elderly--a cluster-randomized controlled trial. Osteoporosis International, 2014. 25(6): p. 1785-95.

15. Korpelainen, R., et al., Long-term outcomes of exercise: follow-up of a randomized trial in older women with osteopenia. Archives of Internal Medicine, 2010. 170(17): p. 1548-56.

16. Giangregorio, L.M., et al., Build better bones with exercise (B3E pilot trial): results of a feasibility study of a multicenter randomized controlled trial of 12 months of home exercise in older women with vertebral fracture. Osteoporosis International, 2018. 29(11): p. 2545-2556.

17. Garcia-Gomariz, C., et al., Effect of 2 years of endurance and high-impact training on preventing osteoporosis in postmenopausal women: randomized clinical trial. Menopause, 2018. 25(3): p. 301-306.

18. Englund, U., et al., The beneficial effects of exercise on BMD are lost after cessation: a 5-year follow-up in older post-menopausal women. Scandinavian Journal of Medicine & Science in Sports, 2009. 19(3): p. 381-8.

19. Durisova, E. and J. Zvarka, The place of kinesiotherapy in the management of osteoporosis. [Slovak]. Osteologicky Bulletin, 2004. 9(4): p. 121-126.

20. Cheng, S., et al., Change in bone mass distribution induced by hormone replacement therapy and high-impact physical exercise in post-menopausal women. Bone, 2002. 31(1): p. 126-35.

**Second publication with same results (n=2):**

1. Watson, S.L., et al., Heavy resistance training is safe and improves bone, function, and stature in postmenopausal women with low to very low bone mass: novel early findings from the LIFTMOR trial. Osteoporosis International, 2015. 26(12): p. 2889-94.

2. Bergstrom, I., et al., Physical training increases osteoprotegerin in postmenopausal women. Journal of Bone & Mineral Metabolism, 2012. 30(2): p. 202-7.

**Full text not available (n=17):**

1. Effects of exercise on bone mineral density of the lumbar spine in postmenopausal women. Annales de readaptation ET de medecine physique.38(3):117-24.

2. Lumbar bone loss and compliance of postmenopausal, psoas-trained women: a 3-year follow-up study. Annales de readaptation ET de medecine physique.41(4):203-8.

3. Bone and muscle structure and function in relation to exercise and oestrogen replacement. http://www who int/trialsearch/Trial2 aspx?TrialID=ISRCTN49902272. 2009.

4. The effect of NatraGuard(trademark), a novel cow's milk protein isolate, on muscle strength and body composition of postmenopausal women undertaking an exercise program. http://www who int/trialsearch/Trial2 aspx?TrialID=ACTRN12610000821099. 2010.

5. The effects of exercise and vibration therapy on bone density and physical function in females aged 55-80 with osteoporosis. http://www who int/trialsearch/Trial2 aspx?TrialID=ISRCTN17157277. 2011.

6. Heartland Osteoporosis Prevention Study. https://clinicaltrials gov/show/NCT02186600. 2014.

7. Effects of different physical activities programs on osteoporosis related-variables in older women. http://www who int/trialsearch/Trial2 aspx?TrialID=RBR 6bqsw8. 2015.

8. Preisinger E, Alacamlioglu Y, Pils K, Metka M, Schneider B, Ernst E. Regular physical exercises delay forearm bone loss - Results of five controlled trials. European Journal of Physical Medicine and Rehabilitation. 1995;5(1):8-12.

9. Prince R, Devine A, Dick I, Kerr D, Criddle A, Price R. A Randomized Trial of the Effects of Calcium Supplementation, as a Tablet or Milk Powder, and Exercise on Bone-Density in Women 10 Years Past the Menopause. Journal of Bone and Mineral Research. 1993;8:S130-S.

10. Sandler R, Cauley J, Laporte R, Kriska A, Hom D, Sashin D. Physical-Activity and Postmenopausal Bone Loss - Results of a 3-Year Clinical-Trial. Gerontologist. 1986;26:A17-A.

11. Svendsen OL, Hassager C, Christiansen C. 6 Months Follow-up on Exercise Added to a Short-Term Diet in Overweight Postmenopausal Women - Effects on Body-Composition, Resting Metabolic-Rate, Cardiovascular Risk-Factors and Bone. International Journal of Obesity. 1994;18(10):692-8.

12. Boggild M, Erlandson M, Tomlinson G, Szabo E, Slatkovska L, Giangregorio L, et al. Effect of 1 year of whole-body vibration therapy on muscle density and volume in postmenopausal women: The vibration study. Journal of Bone and Mineral Research Conference. 2013;28(SUPPL. 1).

13. Brunetti O, Botti FM, Brunetti A, Biscarini A, Scarponi AM, Filippi GM, et al. Effects of focal vibration on bone mineral density and motor performance of postmenopausal osteoporotic women. Journal of Sports Medicine & Physical Fitness. 2015;55(1-2):118-27.

14. Shin S, Lee K, Song C. Effects of whole body vibration with load stimulation in postmenopausal women. Medical Science Technology. 2018;59:4-12.

15. Suominen H, Cheng S, Puolakka J, Sipila S, Taaffe DR. Bone mineral density and moment of inertia in relation to muscle performance in postmenopausal women: An experimental trial on the effects of high-impact physical exercise and estrogen replacement therapy. Journal of Aging and Physical Activity. 1999;7(3):328-.

16. Suominen H, Taaffe DR, Ollikainen S, Puolakka J, Sihvonen S, Sipila S, et al. Additive effects of high impact physical exercise and estrogen replacement therapy on calcaneal bone mineral density in postmenopausal women: A randomized placebo-controlled study. Journal of Bone and Mineral Research. 1999;14:S185-S.

17. Tolomio S, Lalli A, Travain G, Zaccaria M. [Effects of a combined weight-bearing and non-weight-bearing ( warm water) exercise program on bone mass and quality in postmenopausal women with low bone-mineral density]. Clinica Terapeutica. 2009;160(2):105-9.

## Appendix 5: PEDro assessment quality results of included studies

| **Appendix 3 PEDro assessment of the quality of the results in the included studies** | | | | | | | | | | | | | |
| --- | --- | --- | --- | --- | --- | --- | --- | --- | --- | --- | --- | --- | --- |
| Study | Eligibility criteria | Random  allocation | Concealed  allocation | Similar  groups  at baseline | Blinding  subjects | Blinding  therapists | Blinding  assessors | Outcome obtained in more than 85% of the subjects | Intention-to-treat analysis | Between-group  statistical comparison | Point estimates and measures of variability | Total | Quality |
| Sen 2020 | YES | 1 | 0 | 1 | 0 | 0 | 0 | 1 | 1 | 1 | 1 | 6 | M |
| Montgomery 2020 | YES | 1 | 0 | 1 | 0 | 0 | 1 | 0 | 1 | 1 | 1 | 6 | M |
| ElDeeb 2020 | YES | 1 | 1 | 1 | 0 | 0 | 0 | 1 | 0 | 1 | 1 | 6 | M |
| de Oliveira 2019 | YES | 1 | 1 | 1 | 0 | 0 | 0 | 1 | 1 | 1 | 1 | 7 | H |
| Duff2016 | YES | 1 | 1 | 1 | 1 | 0 | 1 | 0 | 1 | 1 | 1 | 8 | H |
| Wang2015 | YES | 1 | 0 | 1 | 0 | 0 | 0 | 1 | 0 | 1 | 1 | 5 | M |
| Nicholson2015 | YES | 1 | 0 | 0 | 0 | 0 | 1 | 1 | 1 | 1 | 1 | 6 | M |
| Liu2015 | YES | 1 | 0 | 1 | 0 | 0 | 0 | 1 | 0 | 1 | 1 | 5 | M |
| Moreira2014 | YES | 1 | 0 | 1 | 0 | 0 | 0 | 1 | 0 | 1 | 1 | 5 | M |
| Lai 2013 | YES | 1 | 0 | 1 | 0 | 0 | 0 | 1 | 0 | 1 | 1 | 5 | M |
| Kemmler2013 | YES | 1 | 0 | 1 | 0 | 0 | 1 | 0 | 1 | 1 | 1 | 6 | M |
| Chilibeck 2013 | YES | 1 | 1 | 1 | 0 | 0 | 1 | 1 | 1 | 1 | 1 | 8 | H |
| Basat 2013 | YES | 1 | 0 | 1 | 0 | 0 | 0 | 1 | 0 | 1 | 1 | 5 | M |
| Orsatti 2013 | YES | 1 | 0 | 0 | 0 | 0 | 0 | 1 | 0 | 1 | 1 | 4 | L |
| Wayne2012 | YES | 1 | 0 | 1 | 0 | 0 | 1 | 1 | 1 | 1 | 1 | 7 | H |
| Karakiriou2012 | YES | 1 | 0 | 1 | 0 | 0 | 1 | 1 | 0 | 1 | 1 | 6 | M |
| Bolton2012 | YES | 1 | 1 | 1 | 0 | 0 | 1 | 1 | 0 | 1 | 1 | 7 | H |
| von Stengel 2011 | YES | 1 | 1 | 1 | 0 | 0 | 0 | 1 | 1 | 1 | 1 | 7 | H |
| von Stengel 2011(1) | YES | 1 | 0 | 1 | 1 | 0 | 1 | 1 | 1 | 1 | 1 | 8 | H |
| Tartibian2011 | No | 1 | 0 | 1 | 0 | 0 | 0 | 1 | 0 | 1 | 1 | 5 | M |
| Slatkovska2011 | YES | 1 | 1 | 1 | 0 | 0 | 1 | 1 | 1 | 1 | 1 | 8 | H |
| Marques 2011 | YES | 1 | 1 | 1 | 0 | 0 | 1 | 0 | 1 | 1 | 1 | 7 | H |
| Marques 2011(1) | YES | 1 | 1 | 1 | 0 | 0 | 0 | 0 | 1 | 1 | 1 | 6 | M |
| Sakai2010 | No | 1 | 0 | 1 | 0 | 0 | 0 | 1 | 0 | 1 | 1 | 5 | M |
| Kemmler2010 | YES | 1 | 0 | 1 | 0 | 0 | 1 | 1 | 1 | 1 | 1 | 7 | H |
| Beck2010 | YES | 1 | 0 | 0 | 0 | 0 | 1 | 1 | 1 | 1 | 1 | 6 | M |
| Bebenek 2010 | YES | 1 | 0 | 1 | 0 | 0 | 1 | 0 | 1 | 1 | 1 | 6 | M |
| Chuin2009 | YES | 1 | 0 | 1 | 0 | 0 | 0 | 1 | 0 | 1 | 1 | 5 | M |
| Bocalini2009 | YES | 1 | 0 | 1 | 0 | 0 | 0 | 0 | 0 | 1 | 1 | 4 | L |
| Park2008 | YES | 1 | 0 | 1 | 0 | 0 | 0 | 1 | 0 | 1 | 1 | 5 | M |
| Bergstrom 2008 | YES | 1 | 0 | 1 | 0 | 0 | 0 | 1 | 1 | 1 | 1 | 6 | M |
| Young2007 | YES | 1 | 0 | 1 | 0 | 0 | 0 | 0 | 0 | 1 | 1 | 4 | L |
| Woo2007 | YES | 1 | 0 | 1 | 0 | 0 | 1 | 1 | 0 | 1 | 1 | 6 | M |
| Maddalozzo 2007 | YES | 1 | 0 | 1 | 0 | 0 | 0 | 1 | 0 | 1 | 1 | 5 | M |
| Evans2007 | YES | 1 | 0 | 1 | 0 | 0 | 0 | 0 | 1 | 1 | 1 | 5 | M |
| Wu2006 | YES | 1 | 0 | 1 | 0 | 0 | 0 | 1 | 0 | 1 | 1 | 5 | M |
| Korpelainen2006 | YES | 1 | 0 | 1 | 0 | 0 | 1 | 1 | 1 | 1 | 1 | 7 | H |
| Gusi2006 | YES | 1 | 0 | 1 | 0 | 0 | 0 | 0 | 1 | 1 | 1 | 5 | M |
| Englund2005 | YES | 1 | 0 | 1 | 0 | 0 | 0 | 1 | 0 | 1 | 1 | 5 | M |
| Verschueren2004 | YES | 1 | 0 | 1 | 0 | 0 | 1 | 1 | 0 | 1 | 1 | 6 | M |
| Liu-Ambrose2004 | YES | 1 | 0 | 1 | 0 | 0 | 1 | 1 | 0 | 1 | 1 | 6 | M |
| Chan2004 | YES | 1 | 0 | 1 | 0 | 0 | 0 | 1 | 0 | 1 | 1 | 5 | M |
| Milliken 2003 | YES | 1 | 0 | 0 | 0 | 0 | 0 | 1 | 0 | 1 | 1 | 4 | L |
| Jessup 2003 | YES | 1 | 0 | 0 | 0 | 0 | 1 | 1 | 0 | 1 | 1 | 5 | M |
| Going2003 | YES | 1 | 0 | 1 | 0 | 0 | 0 | 0 | 1 | 1 | 1 | 5 | M |
| Hans2002 | YES | 1 | 1 | 1 | 0 | 0 | 0 | 1 | 0 | 1 | 1 | 6 | M |
| Chilibeck2002 | YES | 1 | 0 | 1 | 0 | 0 | 0 | 1 | 0 | 1 | 1 | 5 | M |
| Kerry2001 | YES | 1 | 0 | 1 | 0 | 0 | 0 | 0 | 0 | 1 | 1 | 4 | L |
| Iwamoto2001 | No | 1 | 0 | 1 | 0 | 0 | 0 | 1 | 0 | 1 | 1 | 5 | M |
| Rhodes2000 | YES | 1 | 0 | 1 | 0 | 0 | 0 | 1 | 0 | 1 | 1 | 5 | M |
| Bemben 2000 | YES | 1 | 0 | 1 | 0 | 0 | 0 | 1 | 0 | 1 | 1 | 5 | M |
| Tsuritani1998 | No | 1 | 0 | 0 | 0 | 0 | 0 | 0 | 0 | 1 | 1 | 3 | L |
| Ebrahim 1997 | YES | 1 | 1 | 1 | 0 | 0 | 1 | 0 | 0 | 1 | 1 | 6 | M |
| Brooke1997 | YES | 1 | 0 | 1 | 0 | 0 | 1 | 1 | 0 | 1 | 1 | 6 | M |
| Lord1996 | YES | 1 | 0 | 1 | 0 | 0 | 0 | 0 | 0 | 1 | 1 | 4 | L |
| Kerr1996 | YES | 1 | 0 | 1 | 0 | 0 | 0 | 0 | 0 | 1 | 1 | 4 | L |
| Pruitt1995 | YES | 1 | 0 | 1 | 0 | 0 | 0 | 0 | 0 | 1 | 1 | 4 | L |
| Prince 1995 | YES | 1 | 1 | 1 | 0 | 0 | 0 | 0 | 0 | 1 | 1 | 5 | M |
| Nichols1995 | YES | 1 | 0 | 1 | 0 | 0 | 0 | 0 | 0 | 1 | 1 | 4 | L |
| Bassey1995 | YES | 1 | 0 | 0 | 0 | 0 | 1 | 0 | 0 | 1 | 1 | 4 | L |
| Nelson1994 | YES | 1 | 0 | 0 | 0 | 0 | 0 | 1 | 1 | 1 | 1 | 5 | M |
| Hatori1993 | YES | 1 | 0 | 1 | 0 | 0 | 1 | 1 | 0 | 1 | 1 | 6 | M |
| Martin1993 | YES | 1 | 0 | 1 | 0 | 0 | 0 | 0 | 0 | 1 | 1 | 4 | L |
| Lau1992 | YES | 1 | 0 | 1 | 0 | 0 | 0 | 0 | 0 | 1 | 1 | 4 | L |
| Grove1992 | YES | 1 | 0 | 1 | 0 | 0 | 0 | 1 | 0 | 1 | 1 | 5 | M |
| Sinaki1989 | YES | 1 | 0 | 1 | 0 | 0 | 0 | 1 | 0 | 1 | 1 | 5 | M |

The scale contains 11 items. Item one reflects external validity and is not included in the total PEDro score. The other ten items evaluate the internal validity of a clinical trial.1 One point was given for each criterion that was satisfied. Therefore, a score of 0-10 was allocated to each study (≥ 7 = high, 5–6 = moderate, and < 5 = low).2

## Appendix 6: Side-split analyses from network meta-analysis of studies examining the efficacy of exercise intervention in postmenopausal women.

|  |  | Beta coefficients ( standard error) | | |  |
| --- | --- | --- | --- | --- | --- |
| Comparison |  | Direct comparison | Indirect comparison | Overall | P-value |
| BMD at LS |  |  |  |  |  |
| control | RT | 0.01(0.00,0.02) | -0.01(-0.04,0.02) | 0.01(0.00,0.02) | 0.2 |
| control | ME | 0.01(0.01,0.02) | 0.02(0.01,0.03) | 0.01(0.01,0.02) | 0.25 |
| control | WBV | 0.01(0.00,0.02) | 0.01(-0.00,0.03 | 0.01(0.00,0.02) | 0.85 |
| control | MIE | 0.01(-0.00,0.02) | -0.01(-0.04,0.02) | 0.01(-0.010.02) | 0.31 |
| control | LIE | 0.01(-0.00,0.02) | 0.01(-0.02,0.04) | 0.01(0.02,0.02) | 0.81 |
| RT | FE | 0.01(-0.01,0.04) | -0.00(-0.02,0.01) | 0.00(-0.01,0.02) | 0.26 |
| RT | WBV | -0.01(-0.06,0.03) | -0.00(-0.01,0.01) | -0.00(-0.01,0.01) | 0.66 |
| RT | MIE | -0.00(-0.02,0.02) | -0.01(-0.03,0.01) | -0.00(-0.02,0.01) | 0.5 |
| RT | LIE | 0.02(-0.05,0.1) | -0.00(-0.01,0.01) | 0.00(-0.01,0.01) | 0.6 |
| RT | MBE | -0.01(-0.03,0.00) | 0.00(-0.01,0.02) | -0.00(-0.01,0.01) | 0.07 |
| ME | WE | -0.02(-0.03,-0.01) | -0.01(-0.03,0.00) | -0.02(-0.02,-0.01) | 0.5 |
| ME | FE | -0.01(-0.02,0.01) | 0.01(-0.02,0.04) | -0.00(-0.02,0.01) | 0.25 |
| ME | WBV | -0.00(-0.04,0.03) | -0.00(-0.01,0.00) | -0.00(-0.01,0.00) | 0.93 |
| ME | MIE | 0.01(-0.05,0.08) | -0.01(-0.02,0.00) | -0.01(-0.02,0.01) | 0.66 |
| WE | WBV | 0.01(-0.00,0.02) | 0.01(-0.00,0.02) | 0.01(0.00,0.02) | 0.92 |
| WE | MIE | -0.02(-0.05,0.02) | 0.01(-0.00,0.0) | 0.01(0.00,0.02) | 0.18 |
| WBV | LIE | 0.00(-0.03,0.03) | 0.00(-0.01,0.01) | 0.00(-0.01,0.01) | 0.97 |
| WBV | MBE | 0.00(-0.02,0.02) | -0.00(-0.02,0.01) | -0.00(-0.01,0.01) | 0.62 |
| HIE | LIE | -0.01(-0.05,0.03) | -0.05(-0.09,0.00) | -0.02(-0.06,0.01) | 0.19 |
| BMD at FN |  |  |  |  |  |
| control | RT | 0.01(-0.00,0.02) | 0.02(-0.02,0.05) | 0.01(-0.00,0.02) | 0.56 |
| control | ME | 0.03(0.02,0.04) | 0.01(-0.02,0.03) | 0.03(0.01,0.04) | 0.13 |
| control | FE | 0.01(-0.03,0.04) | 0.01(-0.02,0.04) | 0.01(-0.01,0.03) | 0.8 |
| control | WBV | 0.01(-0.01,0.03) | 0.02(-0.00,0.05) | 0.02(0.00,0.03) | 0.43 |
| control | MIE | -0.01(-0.03,0.01) | 0.02(-0.02,0.07) | -0.00(-0.02,0.01) | 0.17 |
| control | LIE | 0.01(-0.00,0.03) | -0.00(-0.04,0.03) | 0.01(-0.01,0.02) | 0.39 |
| RT | FE | -0.01(-0.03,0.02) | 0.03(-0.01,0.07) | 0.00(-0.02,0.02) | 0.16 |
| RT | MIE | 0.01(-0.03,0.04) | -0.02(-0.04,0.01) | -0.01(-0.03,0.01) | 0.26 |
| ME | WE | -0.01(-0.04,0.01) | -0.02(-0.05,0.00) | -0.02(-0.04,0.00) | 0.53 |
| ME | FE | 0.00(-0.03,0.04) | -0.03(-0.06,-0.00) | -0.02(-0.04,0.01) | 0.14 |
| WE | WBV | 0.00(-0.02,0.03) | 0.01(-0.02,0.04) | 0.01(-0.01,0.03) | 0.64 |
| WE | MIE | 0.01(-0.03,0.04) | -0.02(-0.05,0.00) | -0.01(-0.03,0.01) | 0.19 |
| WBV | LIE | -0.04(-0.08,0.00) | 0.00(-0.02,0.02) | -0.01(-0.03,0.01) | 0.08 |
| WBV | MBE | -0.00(-0.05,0.04) | 0.00(-0.02,0.03) | 0.00(-0.02,0.02) | 0.86 |
| BMD at TH |  |  |  |  |  |
| control | FE | 0.01(-0.01,0.02) | 0.02(0.00,0.03) | 0.01(0.00,0.02) | 0.27 |
| control | RT | 0.01(0.00,0.02) | 0.00(-0.02,0.03) | 0.01(0.00,0.02) | 0.6 |
| Control | ME | 0.01(0.00,0.02) | 0.00(-0.02,0.02) | 0.01(0.00,0.01) | 0.58 |
| FE | RT | -0.01(-0.02,0.01) | 0.00(-0.01,0.02) | -0.00(-0.01,0.01) | 0.25 |
| FE | ME | -0.01(-0.02,0.01) | -0.00(-0.02,0.01) | -0.01(-0.02,0.01) | 0.65 |
| WBV | MBE | 0.01(-0.01,0.03) | 0.01(-0.00,0.03) | 0.01(-0.00,0.02) | 0.75 |
| MBE | RT | 0.00(-0.02,0.02) | 0.00(-0.01,0.01) | 0.00(-0.01,0.01) | 0.96 |
| RT | ME | -0.01(-0.03,0.00) | -0.00(-0.01,0.01) | -0.00(-0.01,0.01) | 0.16 |

## Appendix 7: Network graph of included studies for bone mineral density

**
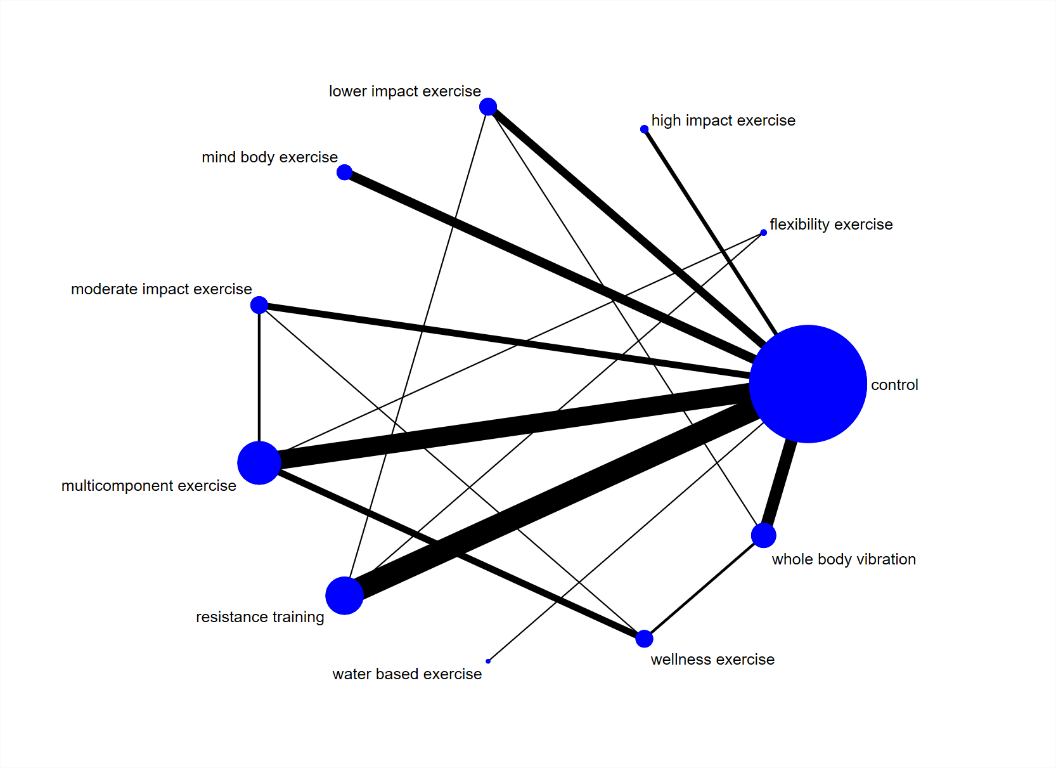
**A.

B.

**
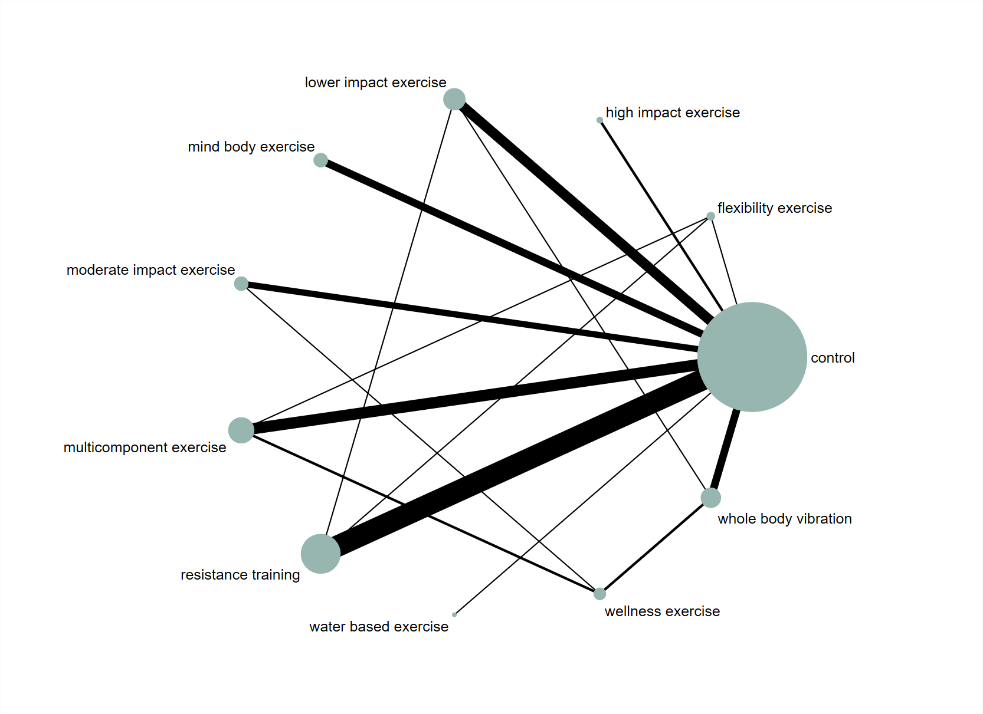
**

**
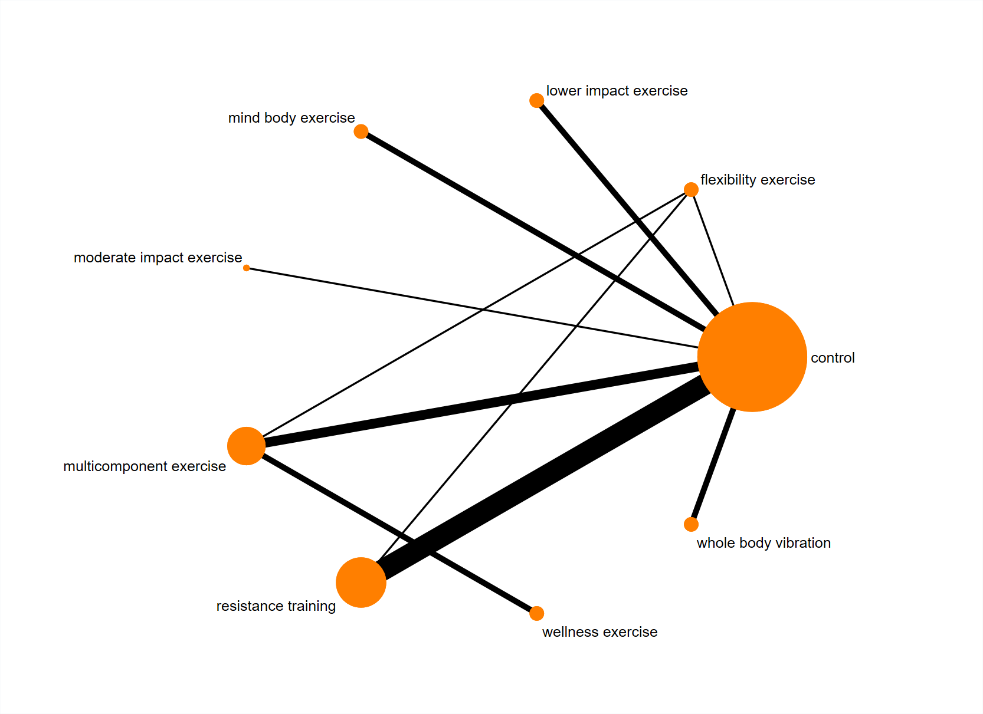
**

C.

Network graph of included studies for bone mineral density. (A) lumbar spine evidence; (B) femoral neck evidence; (C) total hip evidence.

For each outcome, a network diagram was developed in which nodes represented different types of exercise intervention while lines connecting the nodes represented the direct head-to-head comparisons between interventions. In network plots, the size of nodes and the thickness of the edge lines are proportionate to the number of participants and the number of trials, respectively.

RT: resistance training; WBV: whole body vibration; LIE: lower impact exercise; MIE: moderate impact exercise; HIE: higher impact exercise; CMJ: countermovement jump; MBE: mind based exercise; FE: flexibility exercise; WBE: water based exercise; WE: wellness exercise

## Appendix 8: Cumulative ranking plots for BMD at LS

A.

**
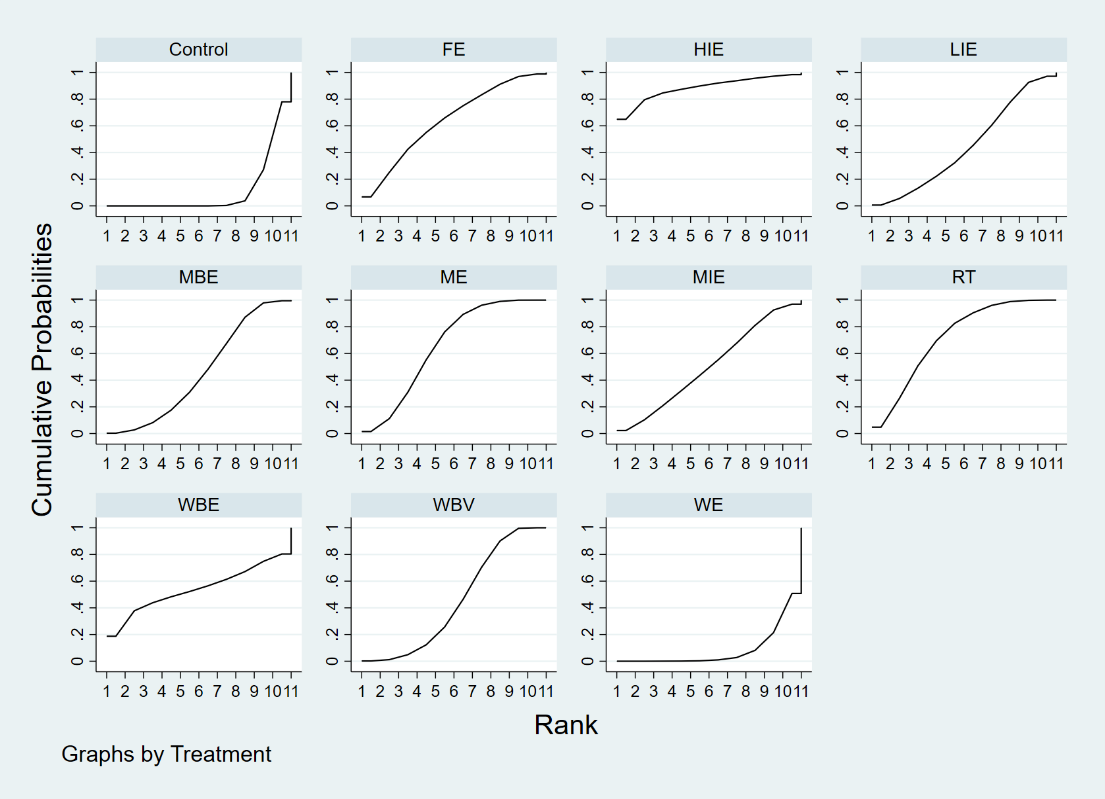

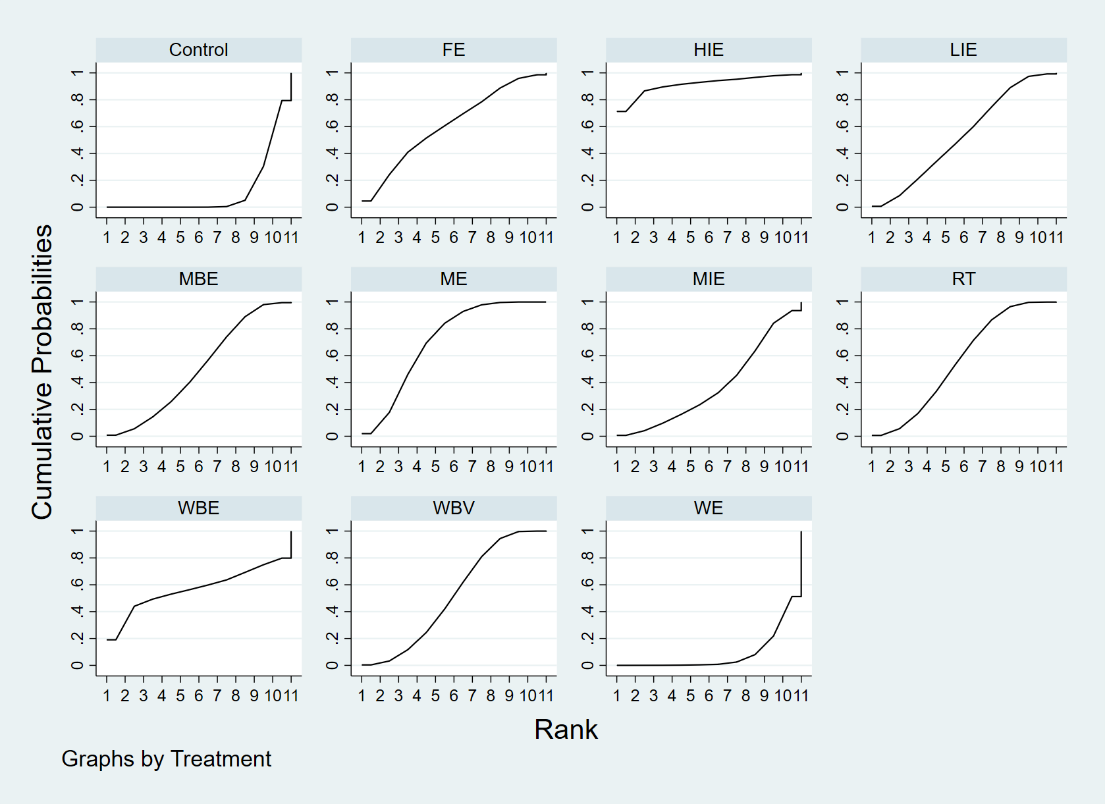
**

Cumulative ranking plots to show comparative effectiveness of treatments from a BMD outcome at LS network meta-analysis, for each of (A) all trials included, (B) low quality studies excluded.

B.

## Appendix 9: Cumulative ranking plots for BMD at FN

A.


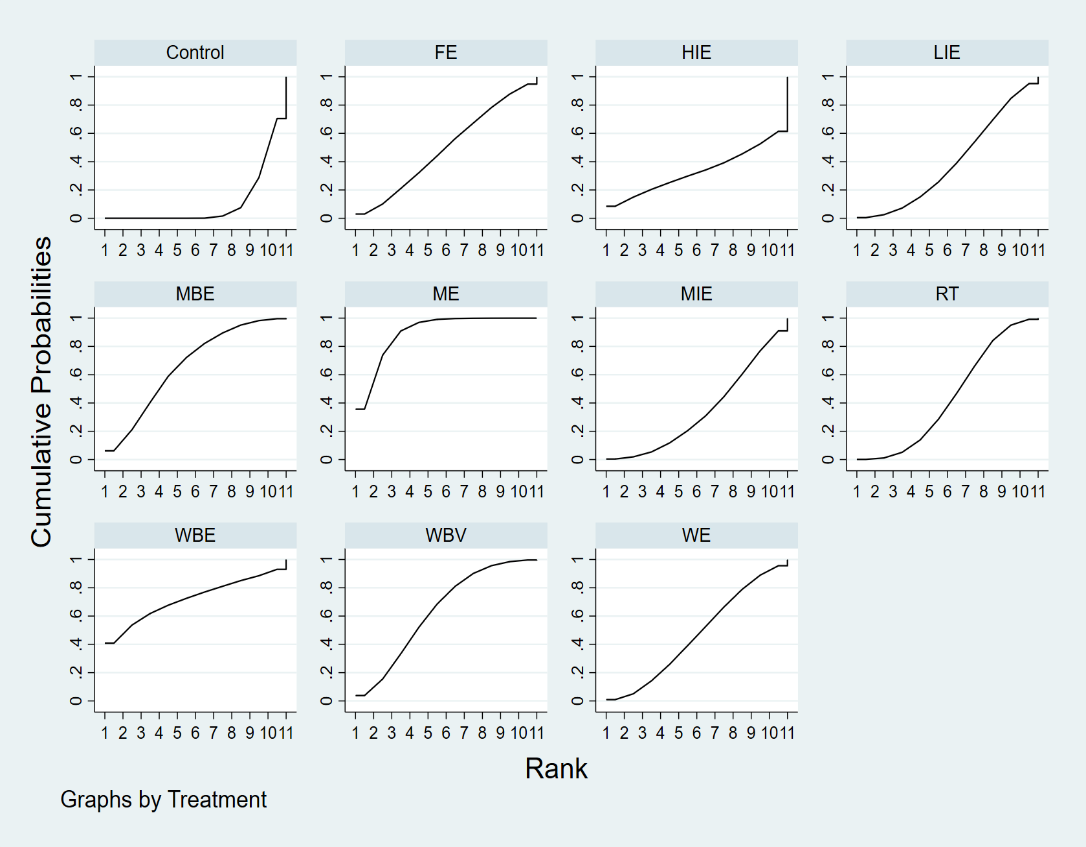


B.


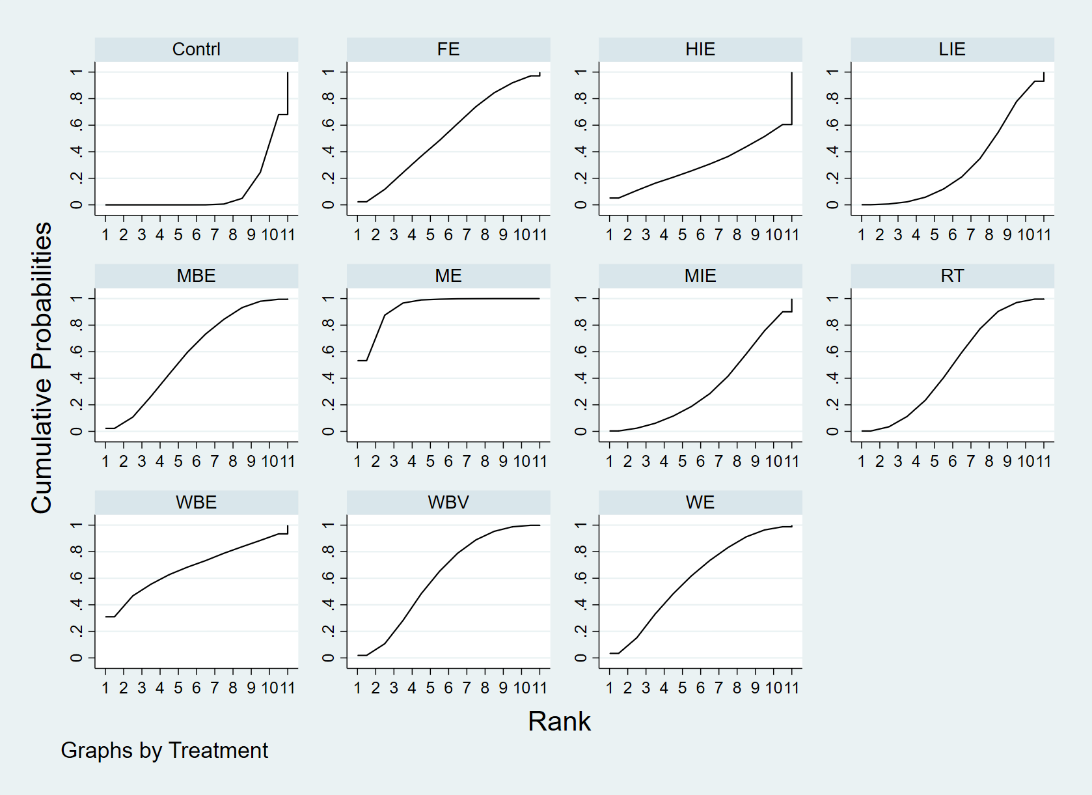


Cumulative ranking plots to show comparative effectiveness of treatments from a BMD outcome at FN network meta-analysis, for each of (A) all trials included, (B) low quality studies excluded.

## Appendix 10: Cumulative ranking plots for BMD at TH

A.

**
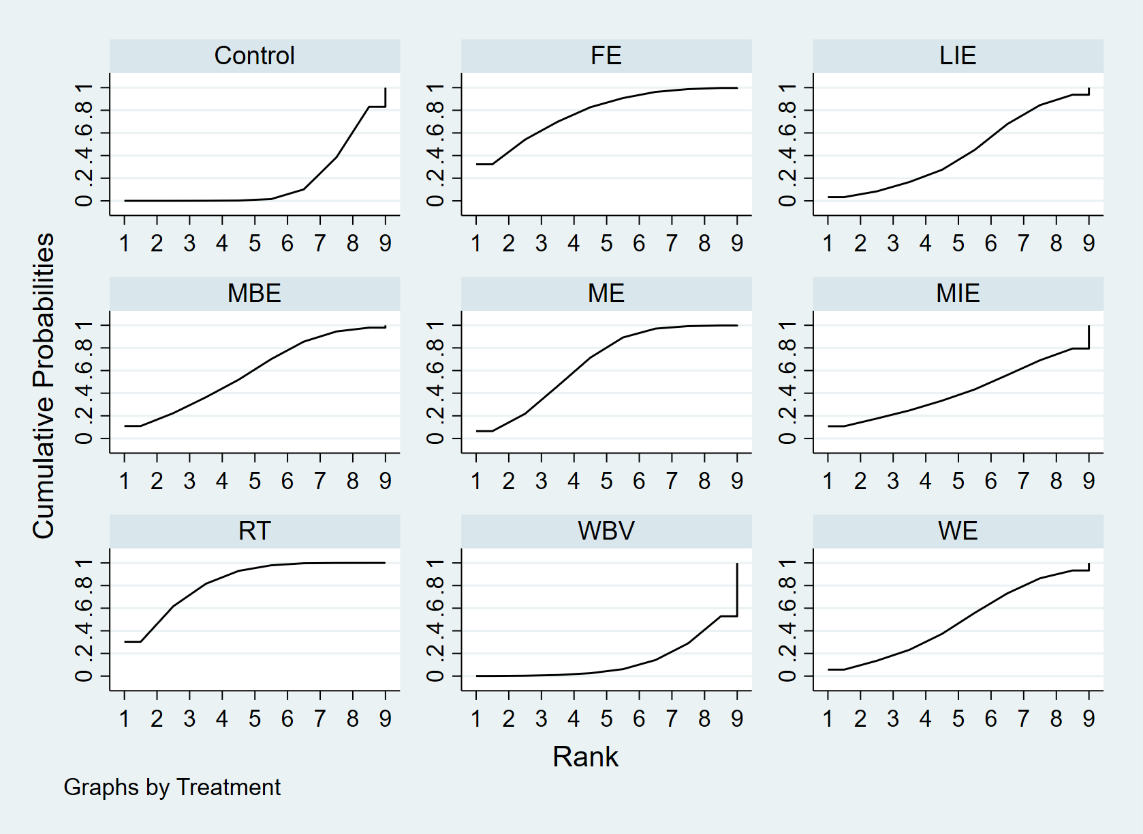
**

B.


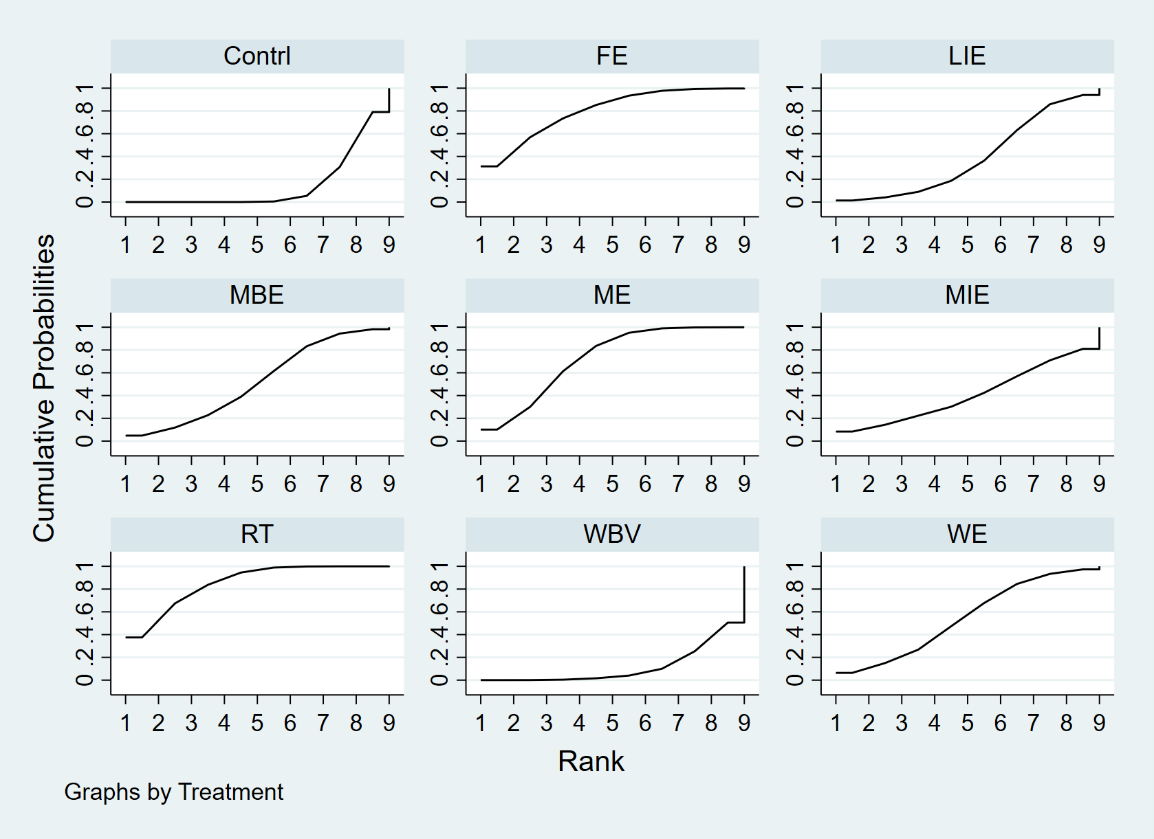


Cumulative ranking plots to show comparative effectiveness of treatments from a BMD outcome at TH network meta-analysis, for each of (A) all trials included, (B) low quality studies excluded.

## Appendix 11: Relative effect estimates for the contrasts between the different interventions and control arms on BMD at TH

| Control | -0.01  (-0.02, 0.00) | **-0.01**  **(-0.02, -0.00)** | 0.00  (-0.01, 0.01) | -0.00  (-0.02, 0.01) | -0.00  (-0.01, 0.00) | -0.01  (-0.02, 0.00) | **-0.01**  **(-0.02, -0.01)** | **-0.01**  **(-0.02, -0.00)** |
| --- | --- | --- | --- | --- | --- | --- | --- | --- |
| -0.00  (-0.02,0.01) | WE | -0.01  (-0.02, 0.01) | 0.01  (-0.01, 0.02) | 0.00  (-0.02, 0.02) | 0.00  (-0.01, 0.02) | -0.00  (-0.02, 0.01) | -0.01  (-0.02, 0.01) | -0.00  (-0.01, 0.01) |
| **-0.01**  **(-0.02,-0.00)** | -0.01  (-0.02,0.01) | FE | **0.02**  **(0.00, 0.03)** | 0.01  (-0.01, 0.03) | 0.01  (-0.00, 0.02) | 0.01  (-0.01, 0.02) | 0.00  (-0.01, 0.01) | 0.00  (-0.01, 0.01) |
| 0.00  (-0.01,0.01) | 0.01  (-0.01,0.02) | **0.01**  **(0.00,0.03)** | WBV | -0.01  (-0.02, 0.01) | -0.01  (-0.02, 0.01) | -0.01  (-0.02, 0.00) | **-0.01**  **(-0.02, -0.00)** | **-0.01**  **(-0.02, -0.00)** |
| -0.00  (-0.02,0.01) | 0.00  (-0.02,0.02) | 0.01  (-0.01,0.03) | -0.01  (-0.02,0.01) | MIE | -0.00  (-0.02, 0.02) | -0.00  (-0.02, 0.01) | -0.01  (-0.02, 0.01) | -0.01  (-0.02, 0.01) |
| -0.00  (-0.01,0.00) | 0.00  (-0.02,0.02) | 0.01  (-0.01,0.02) | -0.01  (-0.02,0.01) | -0.00  (-0.02,0.02) | LIE | -0.00  (-0.02, 0.01) | -0.01  (-0.02, 0.00) | -0.01  (-0.02, 0.01) |
| -0.01  (-0.02,0.00) | -0.00  (-0.02,0.01) | 0.01  (-0.01,0.02) | -0.01  (-0.02,0.00) | -0.00  (-0.02,0.01) | -0.00  (-0.02,0.01) | MBE | -0.00  (-0.01, 0.01) | -0.00  (-0.01, 0.01) |
| **-0.01**  **(-0.02,-0.00)** | -0.01  (-0.02,0.01) | 0.00  (-0.01,0.01) | **-0.01**  **(-0.02,-0.00)** | -0.01  (-0.02,0.01) | -0.01  (-0.02,0.01) | -0.00  (-0.01,0.01) | RT | 0.00  (-0.01, 0.01) |
| **-0.01**  **(-0.01,-0.00)** | -0.00  (-0.01,0.01) | 0.01  (-0.01,0.02) | -0.01  (-0.02,0.00) | -0.00  (-0.02,0.01) | -0.00  (-0.01,0.01) | -0.00  (-0.01,0.01) | 0.01  (-0.01,0.01) | ME |
| Summary estimates from the network meta-analysis are shown in lower left triangle, and summary estimates after excluding low quality studies in upper right triangle. Each cell shows a mean difference (MD), with a 95 % CI in parentheses . For any cell, a negative MD favours the lower-right intervention, and a positive SMD favours the upper-left intervention. Significant results in bold text. | | | | | | | | |

## Appendix 12.1: Relative effect estimates for the contrasts between the different interventions and control arms on BMD at LS in participants with age no less than 60

| Control |  |  |  |  |  |  |  |  |
| --- | --- | --- | --- | --- | --- | --- | --- | --- |
| -0.00  (-0.01, 0.01) | WE |  |  |  |  |  |  |  |
| -0.02  (-0.04, 0.00) | -0.02  (-0.04, 0.01) | FE |  |  |  |  |  |  |
| **-0.01**  **(-0.02, -0.00)** | **-0.01**  **(-0.02, -0.00)** | 0.01  (-0.02, 0.03) | WBV |  |  |  |  |  |
| -0.01  (-0.02, 0.01) | -0.00  (-0.02, 0.01) | 0.02  (-0.01, 0.04) | 0.01  (-0.01, 0.03) | MIE |  |  |  |  |
| **-0.01**  **(-0.02, -0.00)** | -0.01  (-0.02, 0.01) | 0.01  (-0.01, 0.04) | 0.00  (-0.01, 0.02) | -0.00  (-0.02, 0.02) | LIE |  |  |  |
| 0.00  (-0.01, 0.02) | 0.00  (-0.02, 0.03) | 0.02  (-0.00, 0.05) | 0.02  (-0.00, 0.04) | 0.01  (-0.01, 0.03) | 0.01  (-0.01, 0.03) | MBE |  |  |
| **-0.01**  **(-0.01, -0.00)** | -0.01  (-0.02, 0.01) | 0.01  (-0.01, 0.03) | 0.01  (-0.01, 0.02) | -0.00  (-0.02, 0.02) | 0.00  (-0.01, 0.01) | -0.01  (-0.03, 0.01) | RT |  |
| **-0.02**  **(-0.03, -0.01)** | **-0.01**  **(-0.02, -0.00)** | 0.01  (-0.02, 0.03) | -0.00  (-0.01, 0.01) | -0.01  (-0.03, 0.01) | -0.01  (-0.02, 0.00) | -0.02  (-0.04, 0.00) | -0.01  (-0.02, 0.00) | ME |

| Control |  |  |  |  |  |  |  |  |
| --- | --- | --- | --- | --- | --- | --- | --- | --- |
| -0.03  (-0.07,0.01) | WE |  |  |  |  |  |  |  |
| 0.00  (-0.03,0.03) | 0.03  (-0.02,0.08) | FE |  |  |  |  |  |  |
| -0.03  (-0.07,0.00) | -0.01  (-0.04,0.02) | -0.03  (-0.09,0.01) | WBV |  |  |  |  |  |
| -0.00  (-0.02,0.02) | 0.02  (-0.02,0.07) | -0.00  (-0.04,0.04) | 0.03  (-0.01,0.07) | MIE |  |  |  |  |
| -0.01  (-0.03,0.01) | 0.02  (-0.02,0.06) | -0.01  (-0.05,0.03) | 0.03  (-0.01,0.06) | -0.01  (-0.04,0.02) | LIE |  |  |  |
| -0.01  (-0.06,0.03) | 0.01  (-0.04,0.07) | -0.01  (-0.07,0.04) | 0.02  (-0.04,0.08) | -0.01  (-0.06,0.04) | -0.00  (-0.05,0.05) | MBE |  |  |
| -0.01  (-0.02,0.01) | 0.02  (-0.02,0.06) | -0.01  (-0.04,0.02) | -0.03  (-0.01,0.07) | -0.01  (-0.04,0.02) | 0.00  (-0.02,0.03) | -0.01  (-0.04,0.05) | RT |  |
| **-0.03**  **(-0.06,-0.01)** | -0.01  (-0.04,0.03) | -0.03  (-0.07,0.01) | 0.00  (-0.04,0.04) | **-0.03**  **(-0.07,-0.00)** | -0.03  (-0.05,0.00) | -0.02  (-0.07,0.03) | **-0.03**  **(-0.06,-0.00)** | ME |

## Appendix 12.2: Relative effect estimates for the contrasts between the different interventions and control arms on BMD at FN in participants with age no less than 60

## Appendix 12.3: Relative effect estimates for the contrasts between the different interventions and control arms on BMD at TH in participants with age no less than 60

| Control |  |  |  |  |  |  |  |  |
| --- | --- | --- | --- | --- | --- | --- | --- | --- |
| -0.01  (-0.04,0.02) | WE |  |  |  |  |  |  |  |
| -0.01  (-0.02,0.01) | -0.00  (-0.03,0.04) | FE |  |  |  |  |  |  |
| -0.00  (-0.03,0.02) | -0.01  (-0.03,0.05) | -0.00  (-0.02,0.03) | HIE |  |  |  |  |  |
| -0.01  (-0.02,0.01) | -0.00  (-0.03,0.04) | -0.00  (-0.03,0.02) | -0.00  (-0.03,0.03) | MIE |  |  |  |  |
| -0.02  (-0.04,0.01) | -0.01  (-0.05,0.03) | -0.01  (-0.04,0.02) | -0.01  (-0.05,0.02) | -0.01  (-0.04,0.02) | LIE |  |  |  |
| -0.02  (-0.04,0.01) | -0.01  (-0.05,0.03) | -0.01  (-0.04,0.02) | -0.01  (-0.05,0.02) | -0.01  (-0.04,0.02) | -0.00  (-0.04,0.04) | MBE |  |  |
| -0.01  (-0.02,0.00) | -0.00  (-0.03,0.03) | -0.00  (-0.02,0.01) | -0.01  (-0.03,0.02) | -0.00  (-0.02,0.02) | 0.01  (-0.02,0.04) | 0.01  (-0.02,0.04) | WBE |  |
| -0.01  (-0.03,0.01) | -0.00  (-0.02,0.02) | -0.00  (-0.04,0.03) | -0.01  (-0.04,0.03) | -0.00  (-0.03,0.03) | -0.01  (-0.03,0.04) | 0.01  (-0.03,0.04) | -0.00  (-0.03,0.03) | RT |

## Appendix 13: Cumulative ranking plots to show comparative effectiveness of treatments from a BMD outcome at (A) LS, (B) FN, and (C) FN network meta-analysis in participants with age no less than 60

A.

**
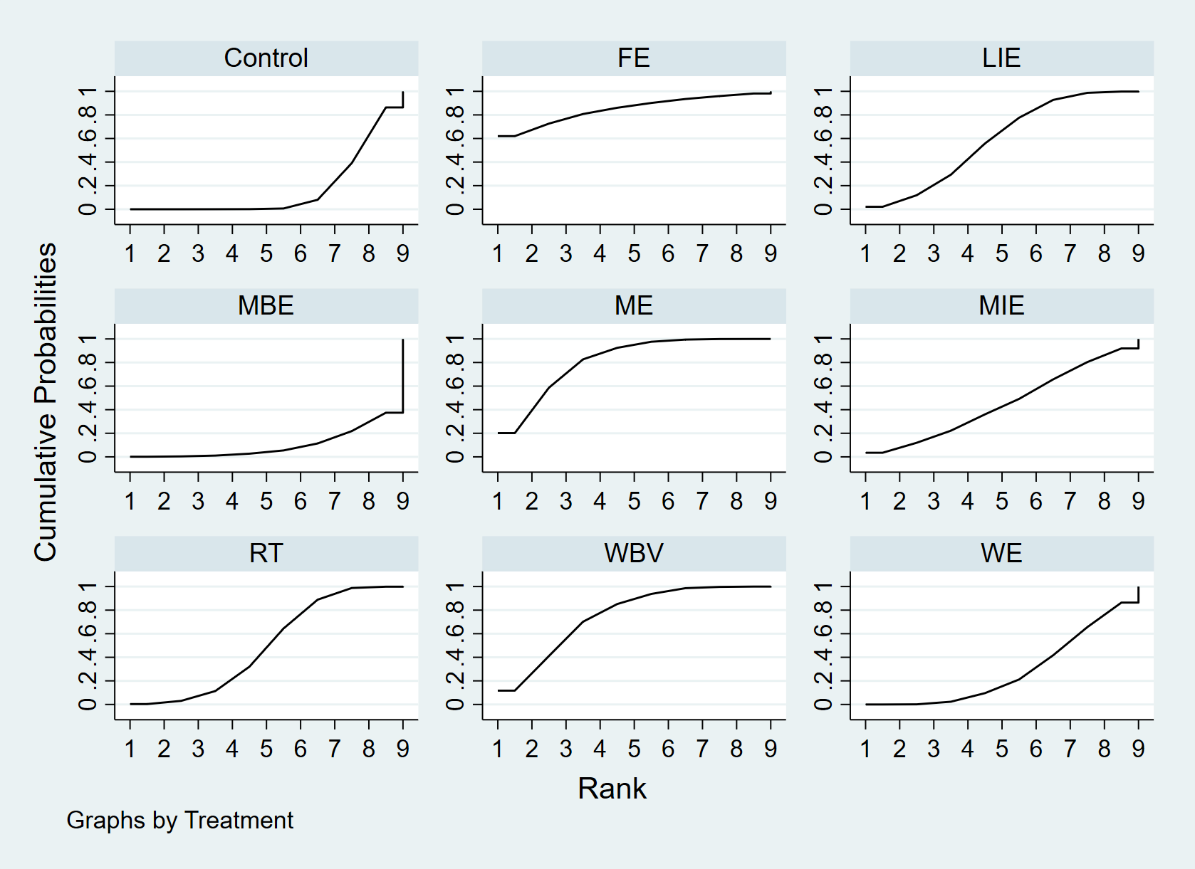
**

B.

**
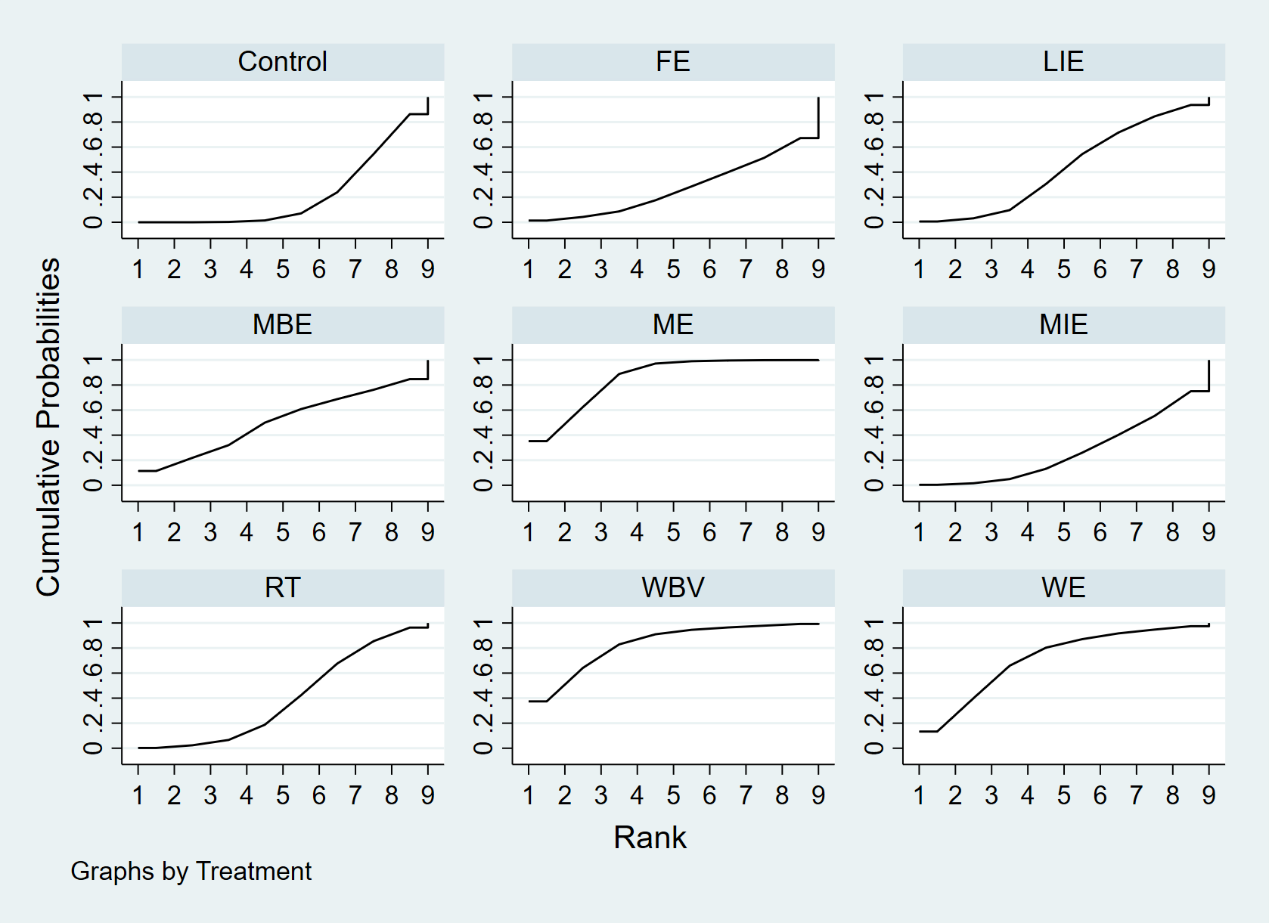
**

C.

**
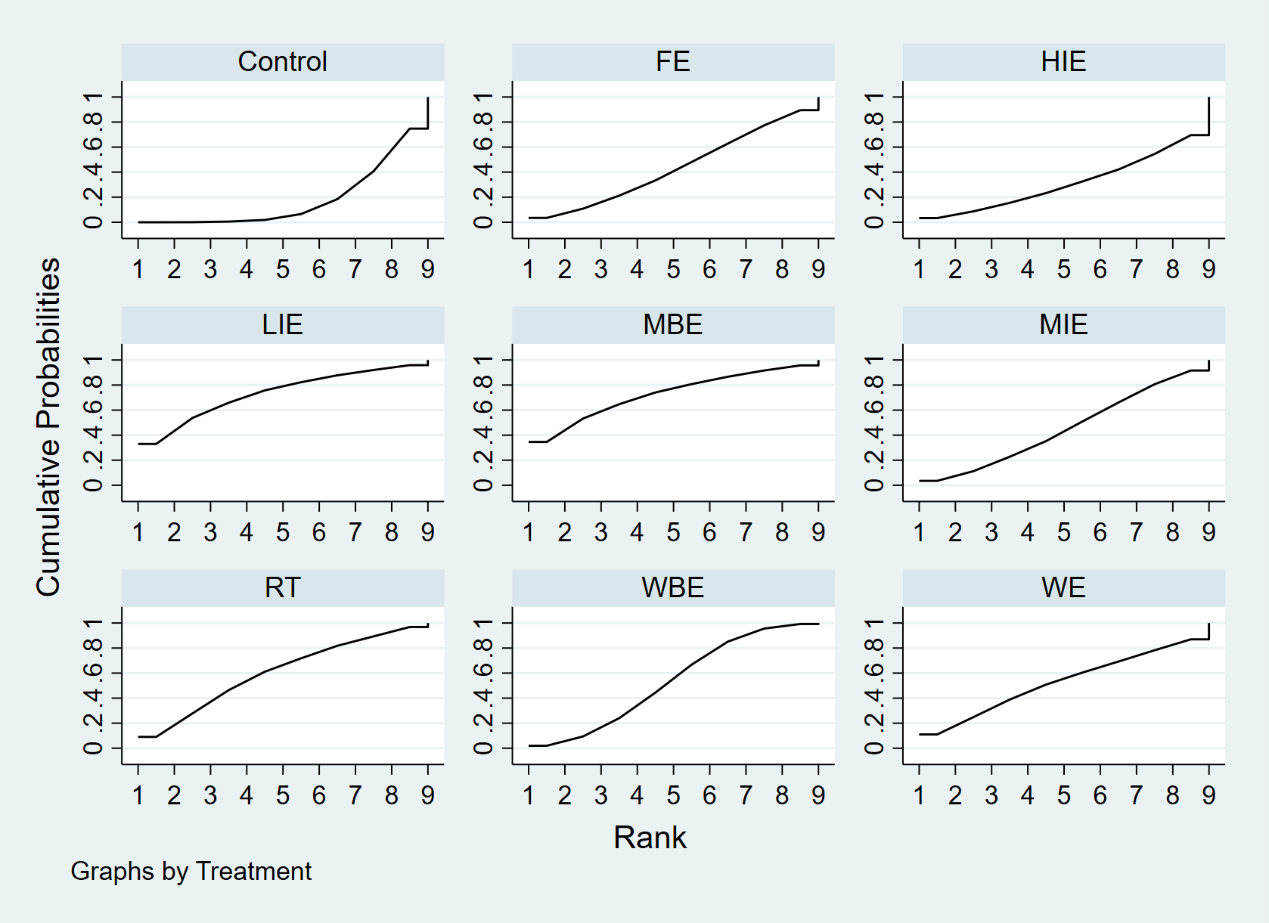
**

## Appendix 14.1: Relative effect estimates for the contrasts between the different interventions and control arms on BMD at LS in participants younger than 60 years old

| Control | **-0.01**  **(-0.03, -0.00)** | **-0.01**  **(-0.03, -0.00)** | 0.00  (-0.02, 0.02) | -0.01  (-0.03, 0.02) | -0.01  (-0.02, 0.00) | **-0.04**  **(-0.08, -0.00)** | -0.01  (-0.03, 0.01) | -0.02  (-0.05, 0.01) | **-0.01**  **(-0.03, -0.00)** | -0.01  (-0.06, 0.03) |
| --- | --- | --- | --- | --- | --- | --- | --- | --- | --- | --- |
|  | RT | 0.00  (-0.02, 0.02) | 0.02  (-0.01, 0.04) | 0.01  (-0.02, 0.03) | 0.01  (-0.01, 0.02) | -0.03  (-0.07, 0.02) | 0.01  (-0.02, 0.03) | -0.01  (-0.04, 0.03) | 0.00  (-0.02, 0.02) | 0.00  (-0.04, 0.05) |
|  |  | ME | **0.02**  **(0.00, 0.03)** | 0.01  (-0.02, 0.03) | 0.00  (-0.01, 0.02) | -0.03  (-0.07, 0.01) | 0.01  (-0.02, 0.03) | -0.01  (-0.04, 0.03) | 0.00  (-0.02, 0.02) | -0.00  (-0.04, 0.05) |
|  |  |  | WE | -0.01  (-0.04, 0.02) | -0.01  (-0.03, 0.01) | -0.04  (-0.09, 0.00) | -0.01  (-0.03, 0.02) | -0.02  (-0.06, 0.01) | -0.02  (-0.04, 0.01) | -0.02  (-0.06, 0.03) |
|  |  |  |  | FE | -0.00  (-0.03, 0.02) | -0.03  (-0.08, 0.01) | -0.00  (-0.03, 0.03) | -0.01  (-0.05, 0.03) | -0.01  (-0.03, 0.02) | -0.01  (-0.06, 0.04) |
|  |  |  |  |  | WBV | -0.03  (-0.08, 0.01) | 0.00  (-0.02, 0.03) | -0.01  (-0.05, 0.02) | -0.00  (-0.02, 0.01) | -0.00  (-0.05, 0.04) |
|  |  |  |  |  |  | HIE | 0.03  (-0.01, 0.08) | 0.02  (-0.02, 0.06) | 0.03  (-0.01, 0.07) | 0.03  (-0.03, 0.09) |
|  |  |  |  |  |  |  | MIE | -0.01  (-0.05, 0.03) | -0.01  (-0.03, 0.02) | -0.01  (-0.05, 0.04) |
|  |  |  |  |  |  |  |  | LIE | 0.01  (-0.03, 0.04) | 0.01  (-0.05, 0.06) |
|  |  |  |  |  |  |  |  |  | MBE | -0.00  (-0.05, 0.05) |
|  |  |  |  |  |  |  |  |  |  | WBE |

## Appendix 14.2: Relative effect estimates for the contrasts between the different interventions and control arms on BMD at FN in participants younger than 60 years old

| Control | -0.01  (-0.03, 0.00) | **-0.03**  **(-0.05, -0.01)** | -0.02  (-0.05, 0.01) | **-0.03**  **(-0.07, -0.00)** | -0.01  (-0.03, 0.00) | -0.00  (-0.04, 0.03) | -0.02  (-0.05, 0.01) | -0.01  (-0.04, 0.01) | **-0.02**  **(-0.03, -0.00)** | -0.02  (-0.06, 0.01) |
| --- | --- | --- | --- | --- | --- | --- | --- | --- | --- | --- |
|  | RT | -0.02  (-0.04, 0.01) | -0.01  (-0.04, 0.03) | -0.02  (-0.06, 0.02) | 0.00  (-0.02, 0.02) | 0.01  (-0.03, 0.05) | -0.01  (-0.04, 0.02) | -0.00  (-0.03, 0.03) | -0.00  (-0.03, 0.02) | -0.01  (-0.05, 0.03) |
|  |  | ME | 0.01  (-0.01, 0.04) | -0.00  (-0.03, 0.02) | 0.02  (-0.00, 0.04) | 0.03  (-0.01, 0.07) | 0.01  (-0.02, 0.04) | 0.01  (-0.02, 0.05) | 0.01  (-0.01, 0.03) | 0.00  (-0.03, 0.04) |
|  |  |  | WE | -0.02  (-0.05, 0.02) | 0.01  (-0.02, 0.04) | 0.01  (-0.03, 0.06) | -0.00  (-0.03, 0.02) | 0.00  (-0.04, 0.04) | 0.00  (-0.03, 0.03) | -0.01  (-0.05, 0.04) |
|  |  |  |  | FE | 0.02  (-0.01, 0.06) | 0.03  (-0.02, 0.08) | 0.01  (-0.03, 0.05) | 0.02  (-0.02, 0.06) | 0.02  (-0.02, 0.05) | 0.01  (-0.04, 0.06) |
|  |  |  |  |  | WBV | 0.01  (-0.03, 0.05) | -0.01  (-0.04, 0.02) | -0.00  (-0.04, 0.03) | -0.01  (-0.03, 0.01) | -0.01  (-0.05, 0.03) |
|  |  |  |  |  |  | HIE | -0.02  (-0.07, 0.03) | -0.01  (-0.06, 0.03) | -0.01  (-0.06, 0.03) | -0.02  (-0.07, 0.03) |
|  |  |  |  |  |  |  | MIE | 0.01  (-0.03, 0.05) | 0.00  (-0.03, 0.04) | -0.00  (-0.05, 0.04) |
|  |  |  |  |  |  |  |  | LIE | -0.00  (-0.03, 0.03) | -0.01  (-0.05, 0.03) |
|  |  |  |  |  |  |  |  |  | MBE | -0.01  (-0.04, 0.03) |
|  |  |  |  |  |  |  |  |  |  | WBE |

## Appendix 14.3: Relative effect estimates for the contrasts between the different interventions and control arms on BMD at TH in participants younger than 60 years old

| Control | -0.01  (-0.03,0.02) | -0.02  (-0.04,0.00) | 00.0  (-0.01,0.01) | -0.00  (-0.02,0.02) | -0.00  (-0.02,0.01) | -0.02  (-0.04,0.00) | -0.01  (-0.02,0.00) | -0.01  (-0.02,0.00) |
| --- | --- | --- | --- | --- | --- | --- | --- | --- |
|  | WE | -0.01  (-0.04,0.01) | 0.01  (-0.02,0.03) | 0.00  (-0.03,0.03) | 0.00  (-0.02,0.03) | -0.01  (-0.04,0.02) | -0.01  (-0.03,0.02) | -0.00  (-0.02,0.01) |
|  |  | FE | 0.02  (-0.01,0.04) | 0.02  (-0.01,0.05) | 0.01  (-0.01,0.04) | -0.00  (-0.03,0.03) | 0.01  (-0.02,0.03) | 0.01  (-0.01,0.03) |
|  |  |  | WBV | -0.00  (-0.03,0.02) | -0.01  (-0.02,0.01) | -0.02  (-0.04,0.00) | -0.01  (-0.04,0.00) | -0.01  (-0.03,0.00) |
|  |  |  |  | MIE | -0.00  (-0.03,0.02) | -0.02  (-0.05,0.01) | -0.01  (-0.03,0.01) | -0.01  (-0.03,0.01) |
|  |  |  |  |  | LIE | -0.01  (-0.04,0.01) | -0.01  (-0.03,0.01) | -0.01  (-0.02,0.01) |
|  |  |  |  |  |  | MBE | 0.01  (-0.02,0.03) | 0.01  (-0.01,0.03) |
|  |  |  |  |  |  |  | WBE | 0.00  (-0.01,0.02) |
|  |  |  |  |  |  |  |  | RT |

## Appendix 15: Cumulative ranking plots to show comparative effectiveness of treatments from a BMD outcome at (A) LS, (B) FN, and (C) FN network meta-analysis in participants younger than 60 years old

A.

**
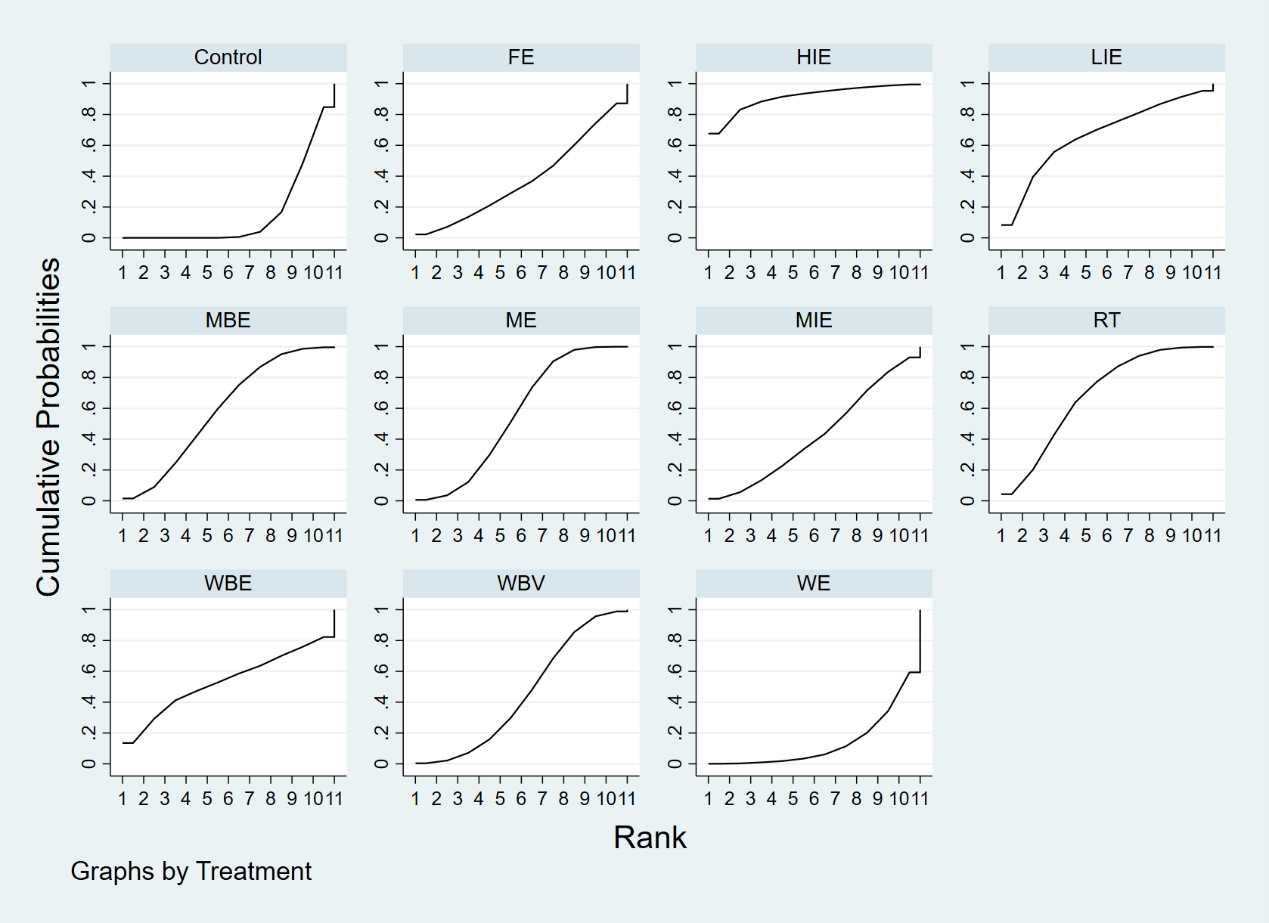
**

B.

**
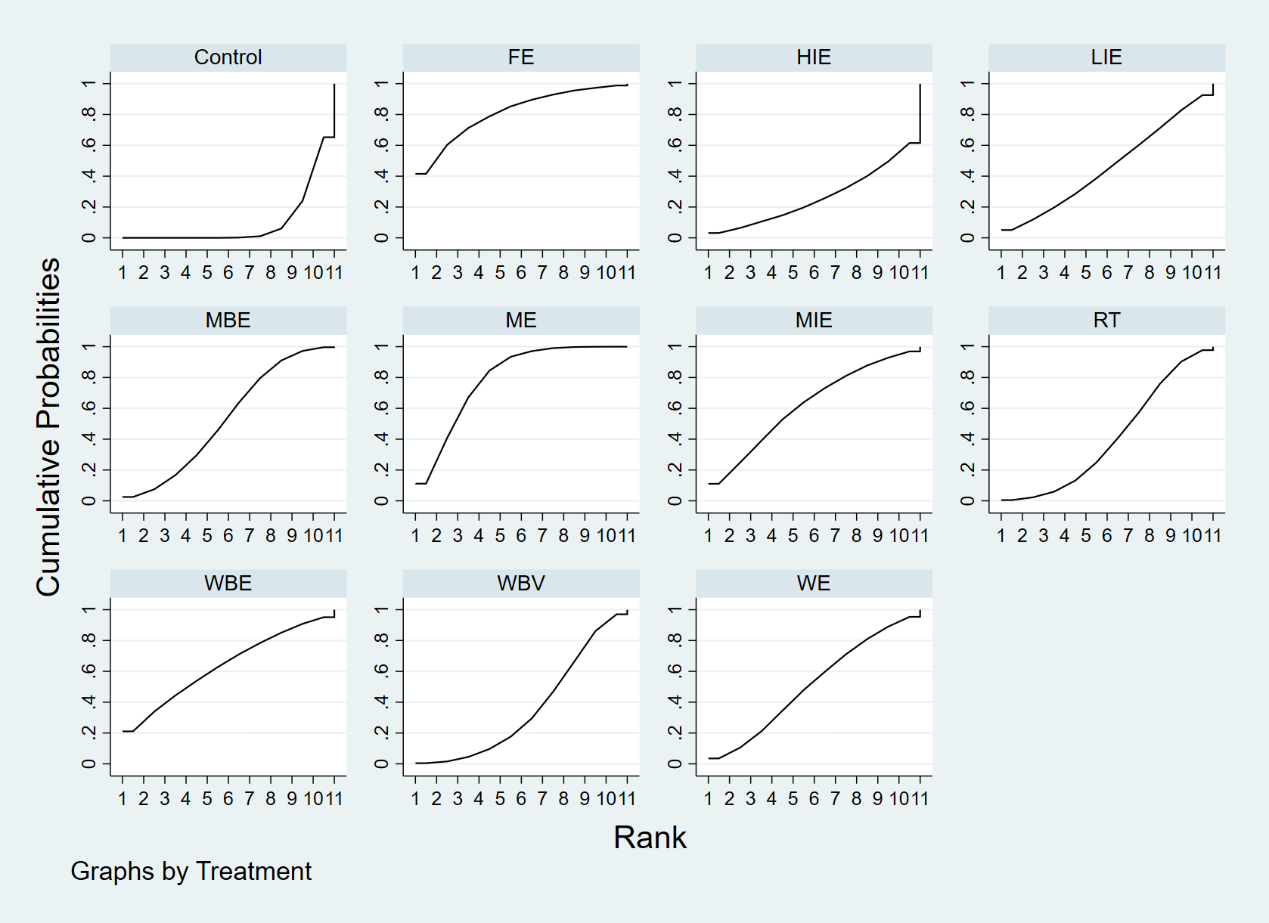
**

C.

**
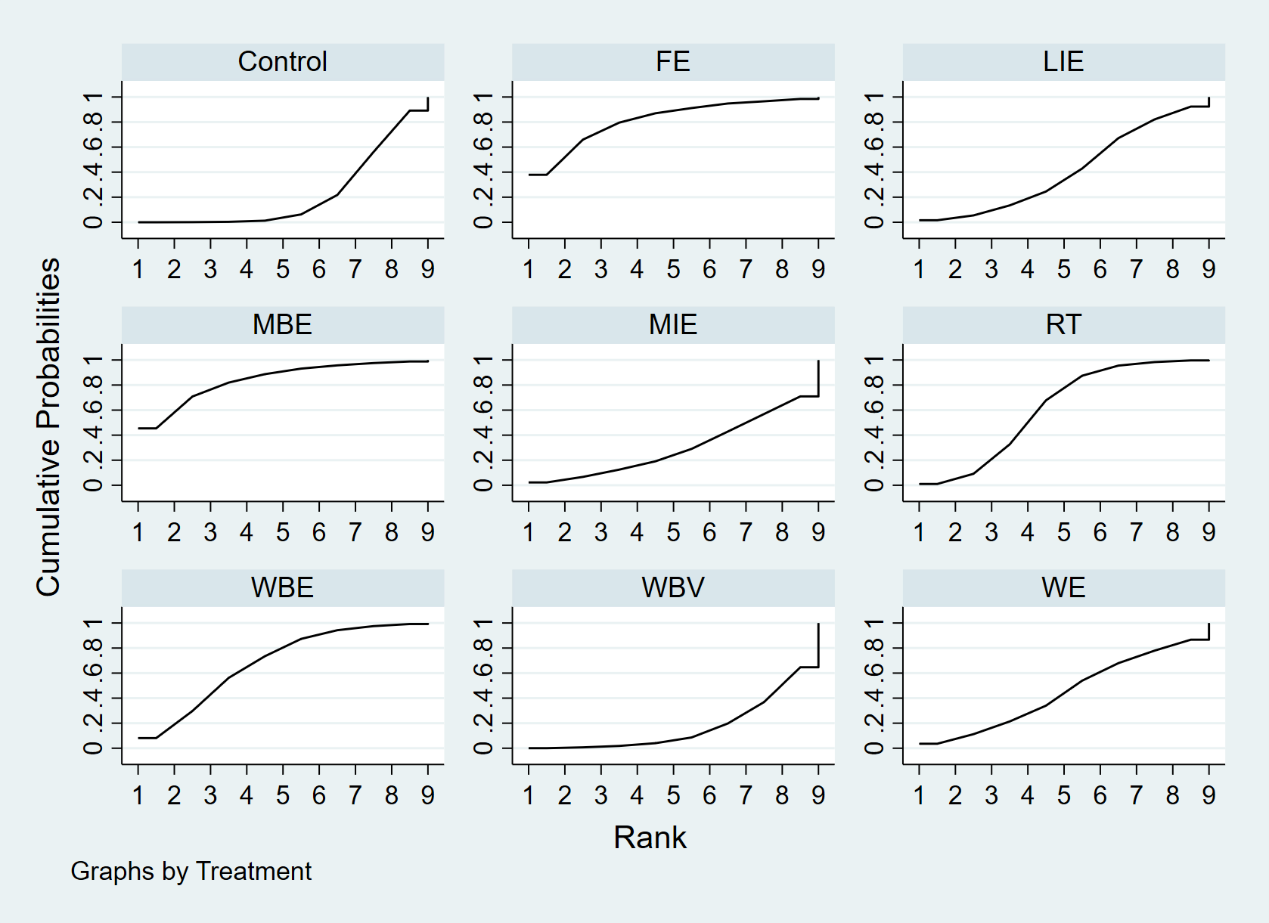
**

## Appendix 16.1: Relative effect estimates for the contrasts between the different interventions and control arms on BMD at LS when exercise intervention with duration no more than eight months

| Control |  |  |  |  |  |  |  |  |
| --- | --- | --- | --- | --- | --- | --- | --- | --- |
| **-0.02**  **(-0.03, -0.01)** | WBV |  |  |  |  |  |  |  |
| 0.02  (-0.02, 0.08) | 0.04  (-0.00, 0.10) | HIE |  |  |  |  |  |  |
| -0.02  (-0.04, 0.01) | 0.01  (-0.02, 0.03) | -0.04  (-0.10, 0.01) | MIE |  |  |  |  |  |
| -0.02  (-0.04, 0.00) | 0.00  (-0.02, 0.02) | -0.04  (-0.11, 0.00) | -0.00  (-0.04, 0.02) | LIE |  |  |  |  |
| **-0.02**  **(-0.04, -0.00)** | 0.00  (-0.02, 0.02) | -0.04  (-0.11, 0.00) | -0.01  (-0.03, 0.02) | -0.00  (-0.03, 0.03) | MBE |  |  |  |
| -0.01  (-0.05, 0.03) | 0.01  (-0.03, 0.05) | -0.03  (-0.11, 0.02) | 0.01  (-0.04, 0.05) | 0.01  (-0.04, 0.05) | 0.01  (-0.04, 0.05) | WBE |  |  |
| **-0.01**  **(-0.03, -0.00)** | 0.01  (-0.01, 0.02) | -0.03  (-0.10, 0.01) | 0.00  (-0.02, 0.02) | 0.01  (-0.02, 0.03) | 0.01  (-0.02, 0.03) | -0.00  (-0.04, 0.04) | RT |  |
| **-0.02**  **(-0.04, -0.01)** | -0.00  (-0.02, 0.02) | -0.04  (-0.11, 0.00) | -0.01  (-0.03, 0.02) | -0.00  (-0.03, 0.03) | -0.00  (-0.02, 0.02) | -0.01  (-0.05, 0.03) | -0.01  (-0.03, 0.01) | ME |

| Control |  |  |  |  |  |  |  |  |  |
| --- | --- | --- | --- | --- | --- | --- | --- | --- | --- |
| **-0.05**  **(-0.07, -0.03)** | ME |  |  |  |  |  |  |  |  |
| -0.01  (-0.04, 0.02) | **0.04**  **(0.01, 0.08)** | FE |  |  |  |  |  |  |  |
| **-0.03**  **(-0.05, -0.01)** | 0.02  (-0.00, 0.05) | -0.02  (-0.06, 0.02) | WBV |  |  |  |  |  |  |
| -0.01  (-0.05, 0.03) | 0.04  (-0.00, 0.09) | -0.00  (-0.05, 0.05) | 0.02  (-0.03, 0.06) | HIE |  |  |  |  |  |
| -0.01  (-0.04, 0.02) | **0.04**  **(0.01, 0.08)** | -0.00  (-0.04, 0.04) | 0.02  (-0.02, 0.05) | 0.00  (-0.05, 0.05) | MIE |  |  |  |  |
| -0.01  (-0.03, 0.01) | **0.05**  **(0.02, 0.07)** | 0.00  (-0.03, 0.03) | 0.02  (-0.01, 0.05) | 0.01  (-0.04, 0.05) | 0.01  (-0.03, 0.04) | LIE |  |  |  |
| -0.02  (-0.06, 0.02) | 0.03  (-0.01, 0.08) | -0.01  (-0.06, 0.04) | 0.01  (-0.03, 0.05) | -0.00  (-0.06, 0.05) | -0.01  (-0.05, 0.04) | -0.01  (-0.05, 0.03) | MBE |  |  |
| -0.02  (-0.06, 0.01) | 0.03  (-0.01, 0.07) | -0.02  (-0.06, 0.03) | 0.00  (-0.04, 0.05) | -0.01  (-0.07, 0.04) | -0.01  (-0.06, 0.03) | -0.02  (-0.06, 0.03) | -0.01  (-0.06, 0.05) | WBE |  |
| -0.01  (-0.02, 0.01) | **0.05**  **(0.02, 0.07)** | 0.00  (-0.03, 0.03) | 0.02  (-0.00, 0.05) | 0.01  (-0.04, 0.05) | 0.01  (-0.02, 0.03) | 0.00  (-0.02, 0.03) | 0.01  (-0.03, 0.05) | 0.02  (-0.02, 0.06) | RT |

## Appendix 16.2: Relative effect estimates for the contrasts between the different interventions and control arms on BMD at FN when exercise intervention with duration no more than eight months

## Appendix 16.3: Relative effect estimates for the contrasts between the different interventions and control arms on BMD at TH when exercise intervention with duration no more than eight months

| Control |  |  |  |  |  |  |  |
| --- | --- | --- | --- | --- | --- | --- | --- |
| -0.01  (-0.03, 0.02) | FE |  |  |  |  |  |  |
| 0.01  (-0.02, 0.04) | 0.02  (-0.02, 0.06) | WBV |  |  |  |  |  |
| -0.00  (-0.03, 0.02) | 0.01  (-0.03, 0.04) | -0.01  (-0.05, 0.03) | MIE |  |  |  |  |
| -0.00  (-0.02, 0.02) | 0.01  (-0.03, 0.04) | -0.01  (-0.05, 0.02) | 0.00  (-0.03, 0.03) | LIE |  |  |  |
| 0.00  (-0.03, 0.03) | 0.01  (-0.03, 0.05) | -0.01  (-0.04, 0.02) | 0.00  (-0.04, 0.04) | 0.00  (-0.03, 0.04) | MBE |  |  |
| -0.01  (-0.02, 0.01) | -0.00  (-0.03, 0.03) | -0.02  (-0.05, 0.01) | -0.01  (-0.03, 0.02) | -0.01  (-0.03, 0.02) | -0.01  (-0.04, 0.03) | RT |  |
| -0.02  (-0.04, 0.00) | -0.01  (-0.04, 0.02) | -0.03  (-0.06, 0.01) | -0.01  (-0.05, 0.02) | -0.02  (-0.04, 0.01) | -0.02  (-0.05, 0.02) | -0.01  (-0.04, 0.02) | ME |

## Appendix 17: Cumulative ranking plots to show comparative effectiveness of treatments from a BMD outcome at (A) LS, (B) FN, and (C) FN network meta-analysis when exercise intervention with duration no more than eight months

A.

**
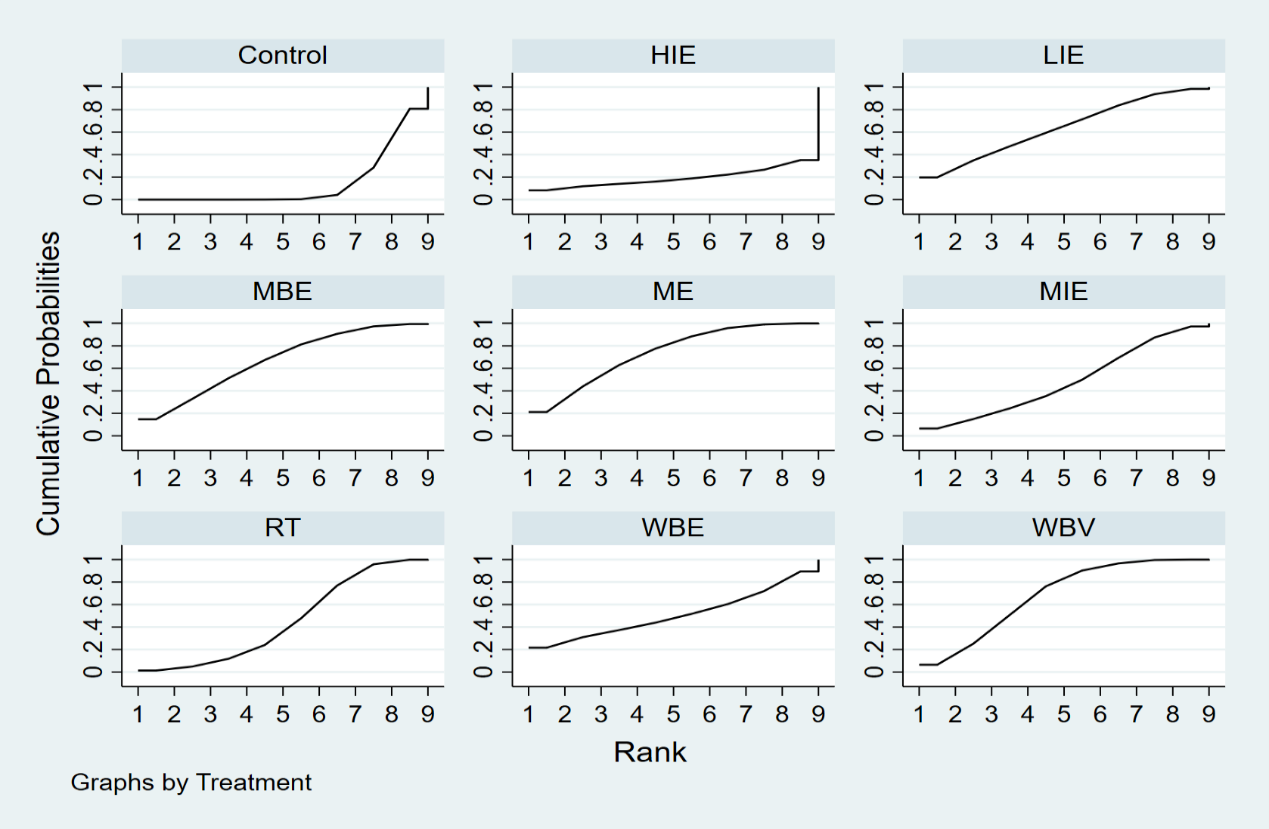
**

B.**
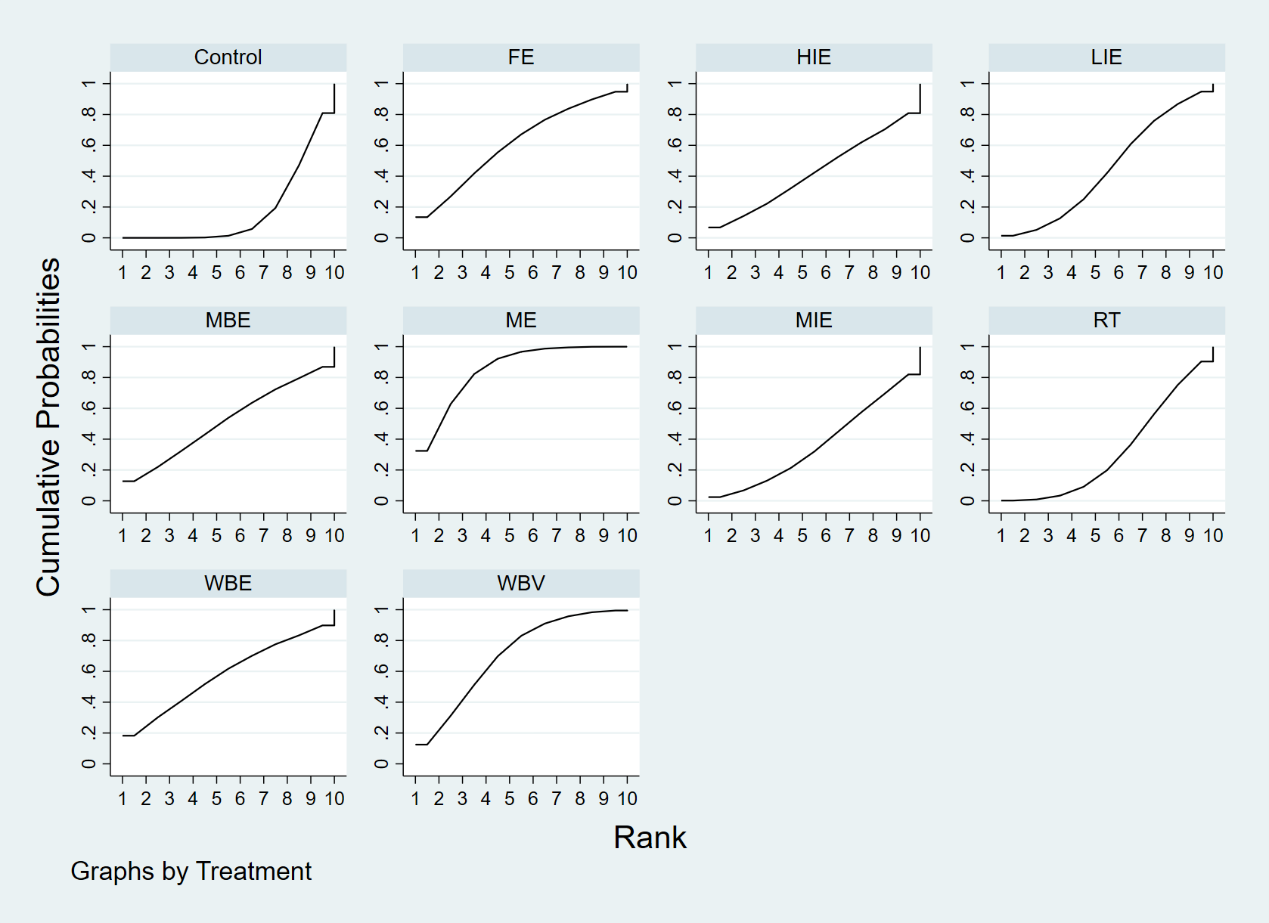
**

C.

**
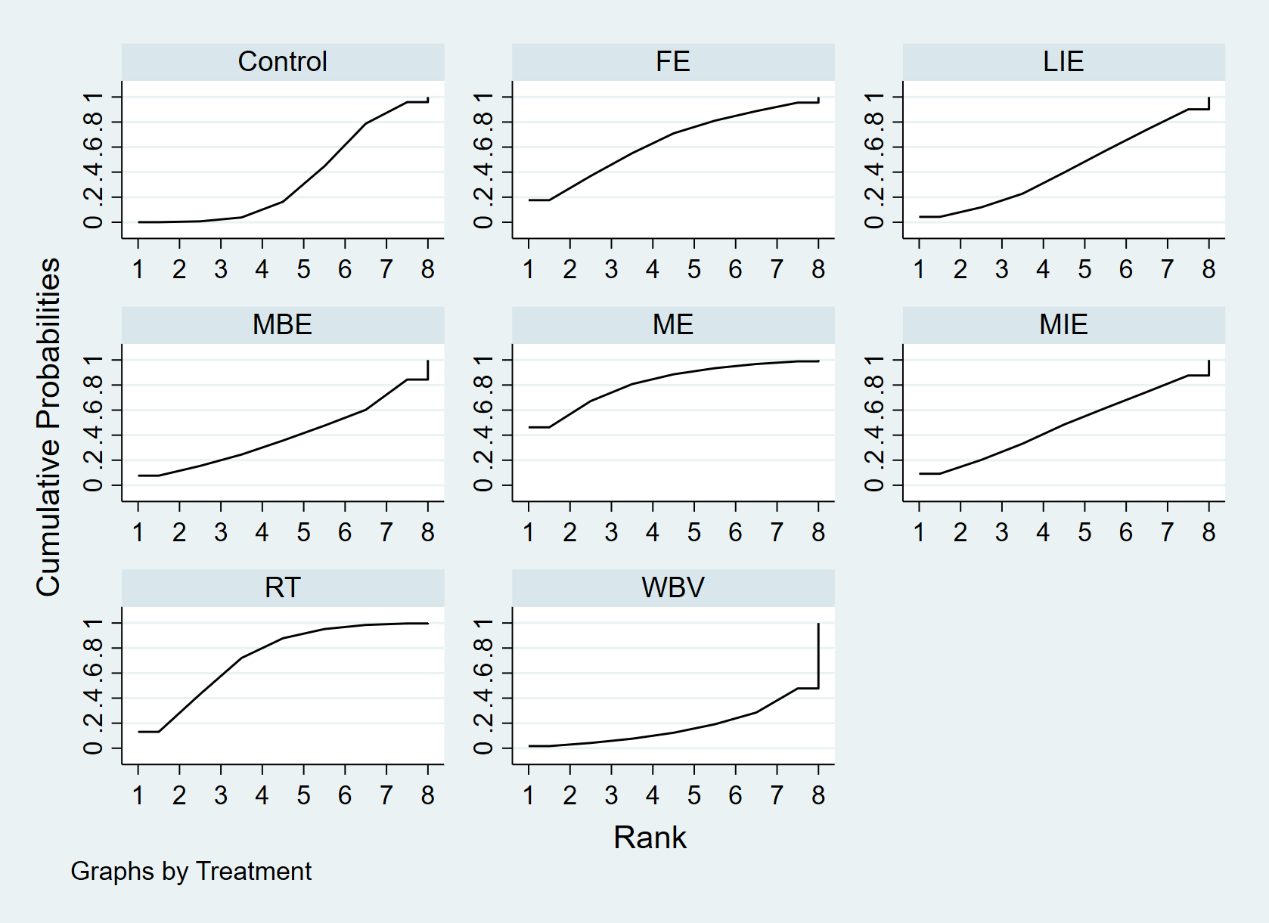
**

| Control | **-0.01**  **(-0.02, -0.00)** | **0.01**  **(0.00, 0.02)** | **-0.01**  **(-0.03, -0.00)** | -0.00  (-0.01, 0.01) | **-0.03**  **(-0.06, -0.01)** | -0.00  (-0.01, 0.01) | -0.01  (-0.02, 0.00) | -0.01  (-0.02, 0.00) | **-0.01**  **(-0.02, -0.00)** |
| --- | --- | --- | --- | --- | --- | --- | --- | --- | --- |
|  | ME | **0.02**  **(0.01, 0.02)** | -0.01  (-0.02, 0.01) | 0.01  (-0.00, 0.02) | -0.02  (-0.06, 0.00) | 0.01  (-0.01, 0.02) | -0.00  (-0.01, 0.01) | 0.00  (-0.01, 0.01) | -0.00  (-0.01, 0.01) |
|  |  | WE | **-0.02**  **(-0.04, -0.01)** | **-0.01**  **(-0.02, -0.00)** | **-0.04**  **(-0.07, -0.01)** | -0.01  (-0.02, 0.00) | **-0.02**  **(-0.03, -0.00)** | **-0.02**  **(-0.03, -0.00)** | **-0.02**  **(-0.03, -0.01)** |
|  |  |  | FE | 0.01  (-0.00, 0.03) | -0.02  (-0.05, 0.01) | 0.02  (-0.01, 0.03) | 0.01  (-0.01, 0.02) | 0.01  (-0.01, 0.02) | 0.00  (-0.01, 0.02) |
|  |  |  |  | WBV | **-0.03**  **(-0.07, -0.00)** | 0.00  (-0.01, 0.01) | -0.01  (-0.02, 0.00) | -0.01  (-0.02, 0.01) | -0.01  (-0.02, 0.00) |
|  |  |  |  |  | HIE | **0.03**  **(0.00, 0.06)** | 0.02  (-0.00, 0.06) | 0.03  (-0.00, 0.06) | 0.02  (-0.01, 0.05) |
|  |  |  |  |  |  | MIE | -0.01  (-0.02, 0.01) | -0.01  (-0.02, 0.01) | -0.01  (-0.03, 0.00) |
|  |  |  |  |  |  |  | LIE | 0.00  (-0.01, 0.01) | -0.00  (-0.02, 0.01) |
|  |  |  |  |  |  |  |  | MBE | -0.01  (-0.02, 0.01) |
|  |  |  |  |  |  |  |  |  | RT |

## Appendix 18.1: Relative effect estimates for the contrasts between the different interventions and control arms on BMD at LS when exercise intervention with duration between 9 to 18 months

## Appendix 18.2: Relative effect estimates for the contrasts between the different interventions and control arms on BMD at FN when exercise intervention with duration between 9 to 18 months

| Control | -0.01  (-0.02, 0.01) | 0.00  (-0.01, 0.02) | -0.01  (-0.03, 0.02) | -0.00  (-0.02, 0.01) | -0.00  (-0.04, 0.04) | -0.00  (-0.02, 0.02) | -0.00  (-0.02, 0.01) | **-0.02**  **(-0.03, -0.00)** | -0.01  (-0.02, 0.00) |
| --- | --- | --- | --- | --- | --- | --- | --- | --- | --- |
|  | ME | 0.01  (-0.01, 0.03) | 0.00  (-0.02, 0.03) | 0.01  (-0.01, 0.03) | 0.01  (-0.04, 0.05) | 0.01  (-0.01, 0.03) | 0.01  (-0.02, 0.03) | -0.01  (-0.03, 0.01) | -0.00  (-0.02, 0.02) |
|  |  | WE | -0.01  (-0.04, 0.02) | -0.01  (-0.02, 0.01) | -0.01  (-0.05, 0.04) | -0.00  (-0.02, 0.02) | -0.01  (-0.03, 0.02) | -0.02  (-0.05, 0.00) | -0.01  (-0.04, 0.01) |
|  |  |  | FE | 0.00  (-0.03, 0.03) | 0.00  (-0.04, 0.05) | 0.01  (-0.02, 0.04) | 0.00  (-0.03, 0.03) | -0.01  (-0.04, 0.02) | -0.00  (-0.03, 0.02) |
|  |  |  |  | WBV | -0.00  (-0.04, 0.04) | 0.00  (-0.02, 0.03) | -0.00  (-0.03, 0.02) | -0.02  (-0.04, 0.01) | -0.01  (-0.03, 0.01) |
|  |  |  |  |  | HIE | 0.00  (-0.04, 0.05) | 0.00  (-0.04, 0.04) | -0.02  (-0.06, 0.03) | -0.01  (-0.05, 0.03) |
|  |  |  |  |  |  | MIE | -0.00  (-0.03, 0.02) | -0.02  (-0.04, 0.00) | -0.01  (-0.03, 0.01) |
|  |  |  |  |  |  |  | LIE | -0.02  (-0.04, 0.01) | -0.01  (-0.03, 0.01) |
|  |  |  |  |  |  |  |  | MBE | 0.01  (-0.01, 0.03) |
|  |  |  |  |  |  |  |  |  | RT |

## Appendix 18.3: Relative effect estimates for the contrasts between the different interventions and control arms on BMD at TH when exercise intervention with duration between 9 to 18 months

| Control | -0.01  (-0.02, 0.01) | -0.01  (-0.02, 0.00) | -0.00  (-0.01, 0.01) | -0.00  (-0.01, 0.01) | -0.01  (-0.02, 0.00) | **-0.01**  **(-0.02, -0.00)** | -0.01  (-0.02, 0.00) |
| --- | --- | --- | --- | --- | --- | --- | --- |
|  | WE | -0.00  (-0.02, 0.01) | 0.00  (-0.01, 0.02) | 0.00  (-0.01, 0.02) | -0.00  (-0.02, 0.01) | -0.00  (-0.02, 0.01) | -0.00  (-0.01, 0.00) |
|  |  | FE | 0.01  (-0.01, 0.02) | 0.01  (-0.01, 0.02) | 0.00  (-0.01, 0.02) | 0.00  (-0.01, 0.02) | 0.00  (-0.01, 0.01) |
|  |  |  | WBV | -0.00  (-0.01, 0.01) | -0.01  (-0.02, 0.00) | -0.01  (-0.02, 0.00) | -0.01  (-0.02, 0.00) |
|  |  |  |  | LIE | -0.01  (-0.02, 0.01) | -0.01  (-0.02, 0.01) | -0.01  (-0.02, 0.01) |
|  |  |  |  |  | MBE | -0.00  (-0.01, 0.01) | -0.00  (-0.01, 0.01) |
|  |  |  |  |  |  | RT | 0.00  (-0.01, 0.01) |
|  |  |  |  |  |  |  | ME |

## Appendix 19: Cumulative ranking plots to show comparative effectiveness of treatments from a BMD outcome at (A) LS, (B) FN, and (C) FN network meta-analysis when exercise intervention with duration between 9 to 18 months

A.

**
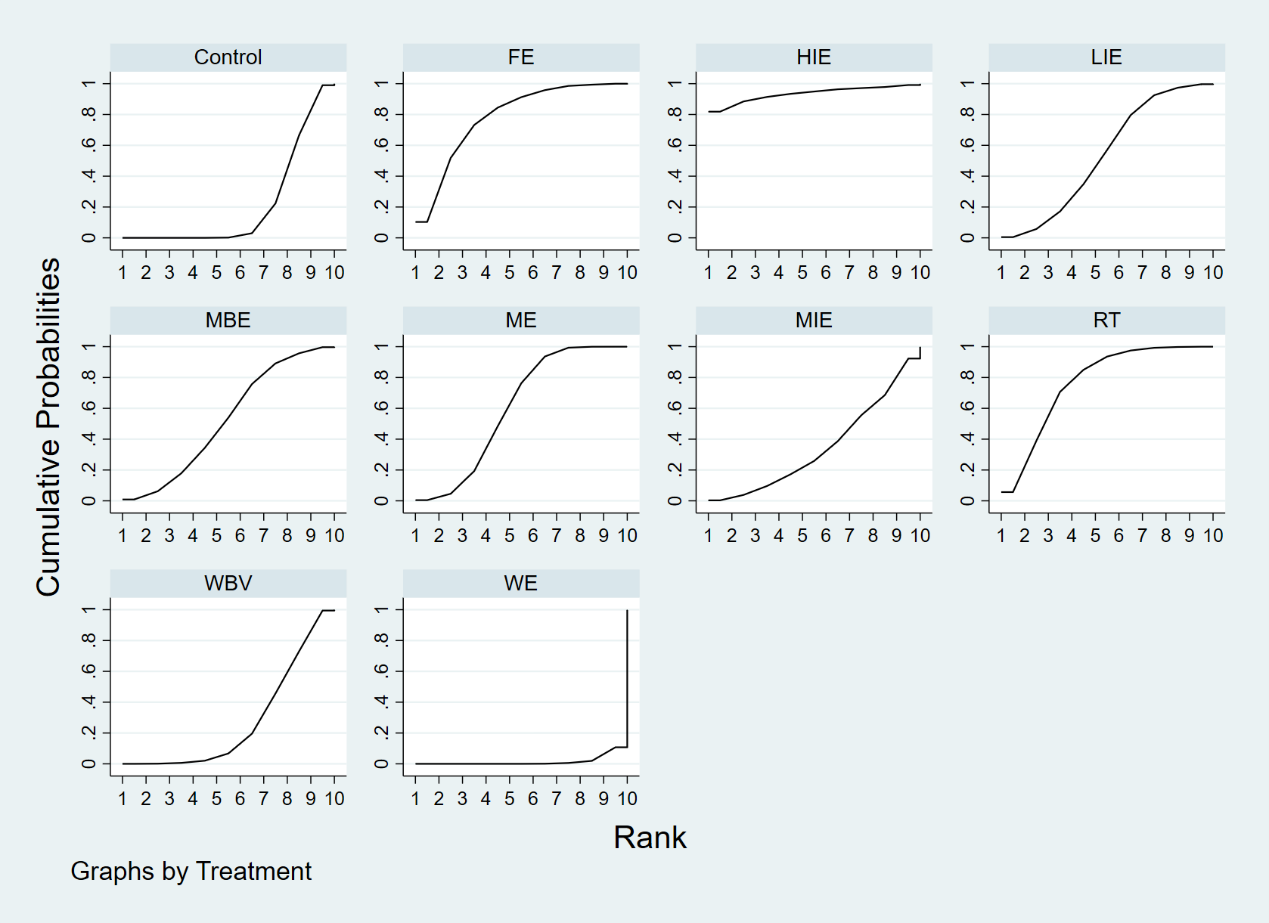
**

B.

**
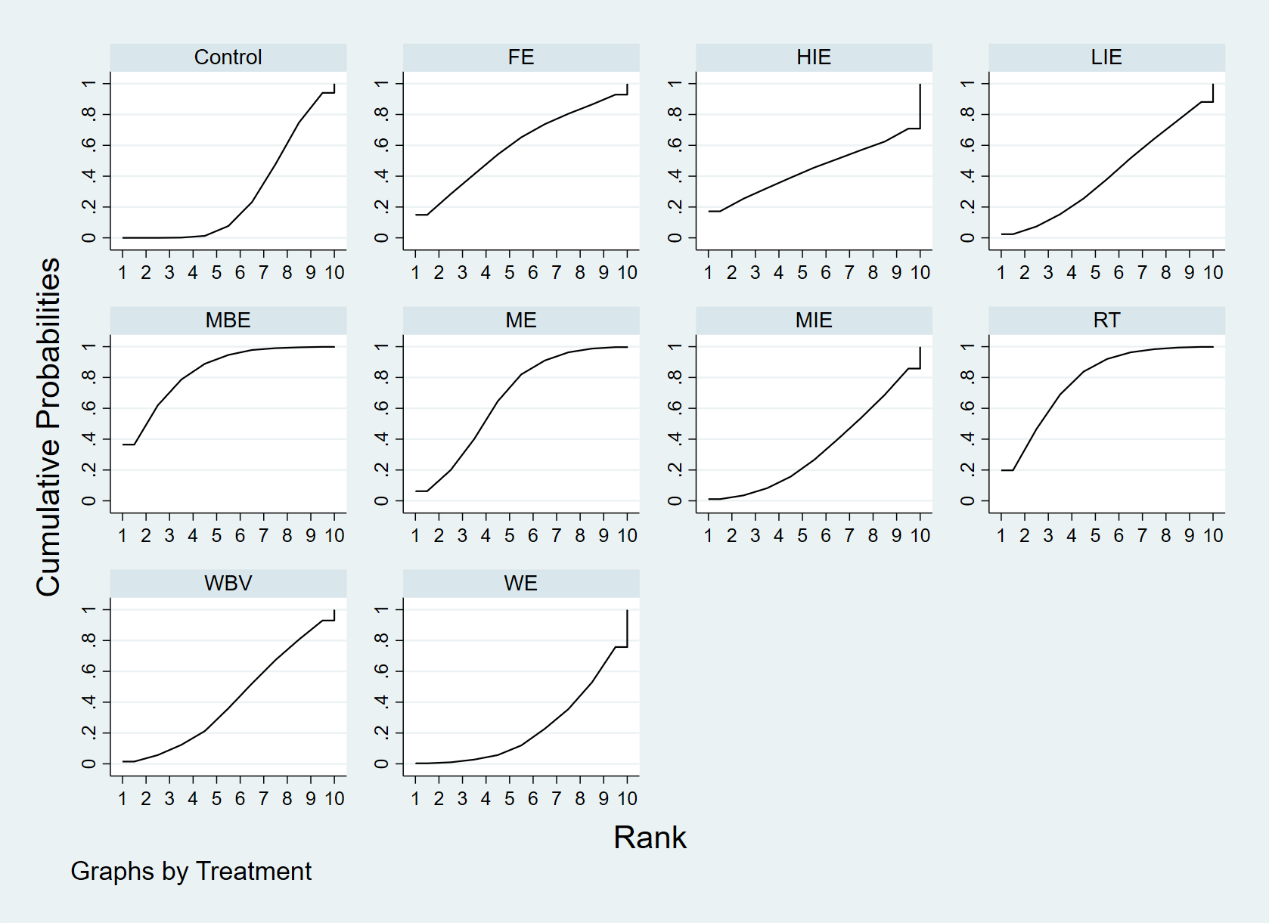
**

C.

**
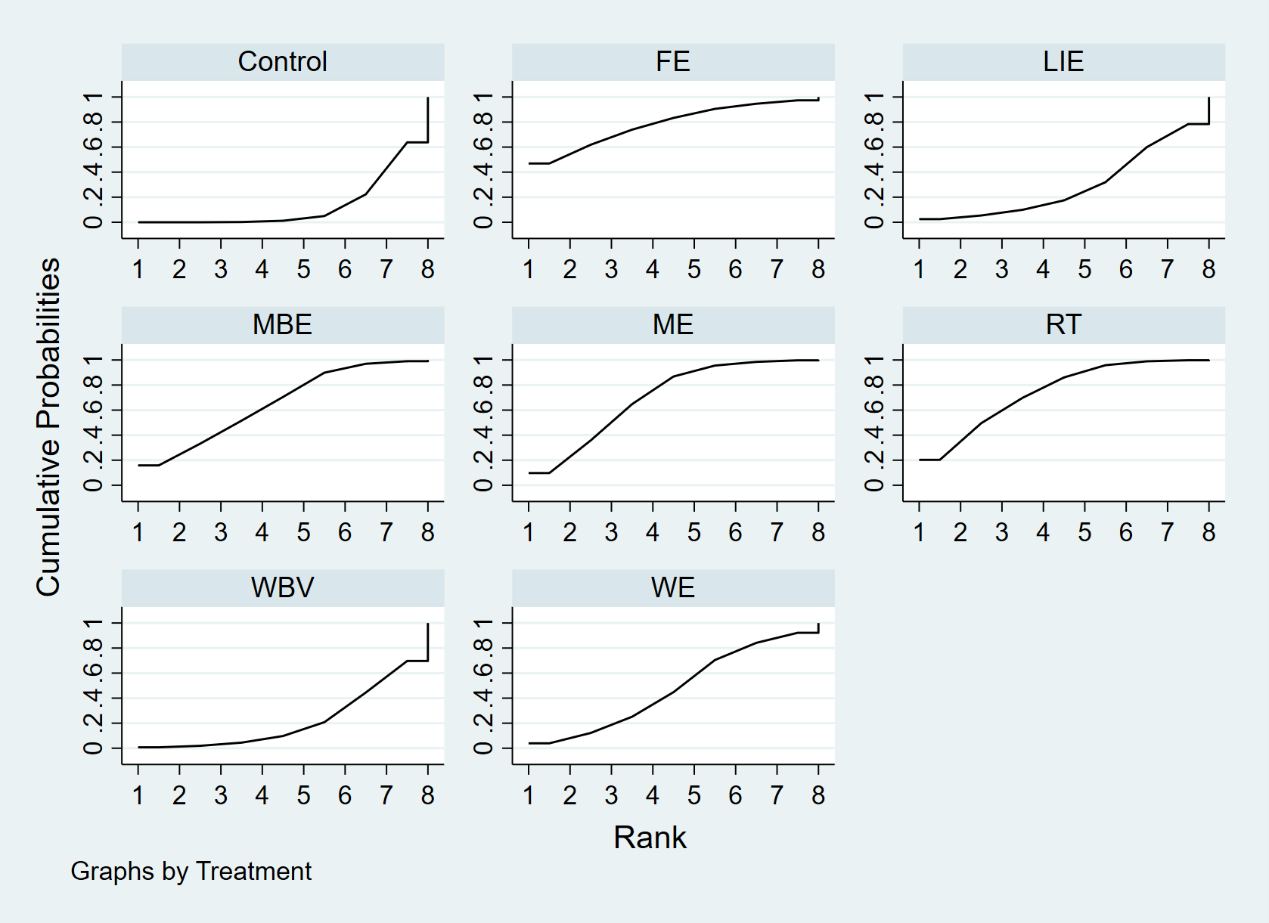
**

## Appendix 20: Summary of certainty of evidence for network meta-analysis in studies examining the effects of physical exercise in postmenopausal women for BMD at LS, FN, and TH.

| Outcome | Certainty of evidence | Reason for downgrade |
| --- | --- | --- |
| BMD at LS | Very low | Imprecision, incoherence |
| BMD at FN | Low | Imprecision |
| BMD at TH | Very low | Within-study bias, reporting bias, imprecision |

## Appendix 21.1: Details on the CINeMA assessment of each pairwise comparisons for BMD at LS

| Comparison | Number of studies | Within-study bias | Reporting bias | Indirectness | Imprecision | Heterogeneity | Incoherence | Confidence rating |
| --- | --- | --- | --- | --- | --- | --- | --- | --- |
| FE:ME | 1 | No concerns | Undetected | No concerns | Major concerns | No concerns | No concerns | Low |
| FE:PRT | 1 | Some concerns | Undetected | No concerns | Major concerns | No concerns | No concerns | Low |
| HIE:LIE | 1 | Some concerns | Undetected | No concerns | Major concerns | No concerns | No concerns | Low |
| control:HIE | 3 | Some concerns | Undetected | No concerns | No concerns | Major concerns | No concerns | Low |
| LIE:PRT | 1 | Major concerns | Undetected | No concerns | Major concerns | No concerns | No concerns | Very low |
| LIE:WBV | 1 | Some concerns | Undetected | No concerns | Major concerns | No concerns | No concerns | Low |
| control:LIE | 6 | Some concerns | Undetected | No concerns | No concerns | Major concerns | No concerns | Low |
| MBE:RT | 1 | Some concerns | Undetected | No concerns | Major concerns | No concerns | No concerns | Low |
| MBE:WBV | 1 | No concerns | Undetected | No concerns | Major concerns | No concerns | No concerns | Low |
| control:MBE | 7 | Some concerns | Undetected | No concerns | No concerns | Major concerns | No concerns | Low |
| ME:MIE | 2 | Some concerns | Undetected | No concerns | Major concerns | No concerns | No concerns | Low |
| ME:PRT | 1 | Some concerns | Undetected | No concerns | Major concerns | No concerns | No concerns | Low |
| ME:WBV | 1 | Some concerns | Undetected | No concerns | Major concerns | No concerns | No concerns | Low |
| ME:WE | 5 | Some concerns | Undetected | No concerns | No concerns | No concerns | No concerns | Moderate |
| control:ME | 14 | Some concerns | Undetected | No concerns | No concerns | No concerns | No concerns | Moderate |
| MIE:RT | 1 | Some concerns | Undetected | No concerns | Major concerns | No concerns | No concerns | Low |
| MIE:WE | 1 | Some concerns | Undetected | No concerns | Major concerns | No concerns | No concerns | Low |
| control:MIE | 5 | Some concerns | Undetected | No concerns | Major concerns | No concerns | No concerns | Low |
| PRT:WBV | 1 | Some concerns | Undetected | No concerns | Major concerns | No concerns | No concerns | Low |
| control:PRT | 13 | Major concerns | Undetected | No concerns | No concerns | Major concerns | No concerns | Very low |
| control:RT | 4 | Some concerns | Undetected | No concerns | No concerns | No concerns | No concerns | Moderate |
| control:WBE | 1 | Some concerns | Undetected | No concerns | Major concerns | No concerns | Major concerns | Very low |
| WBV:WE | 2 | No concerns | Undetected | No concerns | No concerns | Major concerns | No concerns | Low |
| control:WBV | 9 | No concerns | Undetected | No concerns | No concerns | Major concerns | No concerns | Low |
| FE:HIE | 0 | Some concerns | Undetected | No concerns | Major concerns | No concerns | Major concerns | Very low |
| FE:LIE | 0 | Some concerns | Undetected | No concerns | Major concerns | No concerns | Major concerns | Very low |
| FE:MBE | 0 | Some concerns | Undetected | No concerns | Major concerns | No concerns | Major concerns | Very low |
| FE:MIE | 0 | Some concerns | Undetected | No concerns | Major concerns | No concerns | Major concerns | Very low |
| FE:RT | 0 | Some concerns | Undetected | No concerns | Major concerns | No concerns | Major concerns | Very low |
| FE:WBE | 0 | Some concerns | Undetected | No concerns | Major concerns | No concerns | Major concerns | Very low |
| FE:WBV | 0 | No concerns | Undetected | No concerns | Major concerns | No concerns | Major concerns | Very low |
| FE:WE | 0 | No concerns | Undetected | No concerns | Major concerns | No concerns | Major concerns | Very low |
| control:FE | 0 | Some concerns | Undetected | No concerns | Major concerns | No concerns | Major concerns | Very low |
| HIE:MBE | 0 | Some concerns | Undetected | No concerns | Major concerns | No concerns | Major concerns | Very low |
| HIE:ME | 0 | Some concerns | Undetected | No concerns | Major concerns | No concerns | Major concerns | Very low |
| HIE:MIE | 0 | Some concerns | Undetected | No concerns | Major concerns | No concerns | Major concerns | Very low |
| HIE:PRT | 0 | Some concerns | Undetected | No concerns | Major concerns | No concerns | Major concerns | Very low |
| HIE:RT | 0 | Some concerns | Undetected | No concerns | Major concerns | No concerns | Major concerns | Very low |
| HIE:WBE | 0 | Some concerns | Undetected | No concerns | Major concerns | No concerns | Major concerns | Very low |
| HIE:WBV | 0 | Some concerns | Undetected | No concerns | Major concerns | No concerns | Major concerns | Very low |
| HIE:WE | 0 | Some concerns | Undetected | No concerns | No concerns | No concerns | Major concerns | Low |
| LIE:MBE | 0 | Some concerns | Undetected | No concerns | Major concerns | No concerns | Major concerns | Very low |
| LIE:ME | 0 | Some concerns | Undetected | No concerns | Major concerns | No concerns | Major concerns | Very low |
| LIE:MIE | 0 | Some concerns | Undetected | No concerns | Major concerns | No concerns | Major concerns | Very low |
| LIE:RT | 0 | Some concerns | Undetected | No concerns | Major concerns | No concerns | Major concerns | Very low |
| LIE:WBE | 0 | Some concerns | Undetected | No concerns | Major concerns | No concerns | Major concerns | Very low |
| LIE:WE | 0 | Some concerns | Undetected | No concerns | No concerns | Major concerns | Major concerns | Very low |
| MBE:ME | 0 | Some concerns | Undetected | No concerns | Major concerns | No concerns | Major concerns | Very low |
| MBE:MIE | 0 | Some concerns | Undetected | No concerns | Major concerns | No concerns | Major concerns | Very low |
| MBE:PRT | 0 | Some concerns | Undetected | No concerns | Major concerns | No concerns | Major concerns | Very low |
| MBE:WBE | 0 | Some concerns | Undetected | No concerns | Major concerns | No concerns | Major concerns | Very low |
| MBE:WE | 0 | Some concerns | Undetected | No concerns | No concerns | Major concerns | Major concerns | Very low |
| ME:RT | 0 | Some concerns | Undetected | No concerns | Major concerns | No concerns | Major concerns | Very low |
| ME:WBE | 0 | Some concerns | Undetected | No concerns | Major concerns | No concerns | Major concerns | Very low |
| MIE:PRT | 0 | Some concerns | Undetected | No concerns | Major concerns | No concerns | Major concerns | Very low |
| MIE:WBE | 0 | Some concerns | Undetected | No concerns | Major concerns | No concerns | Major concerns | Very low |
| MIE:WBV | 0 | Some concerns | Undetected | No concerns | Major concerns | No concerns | Major concerns | Very low |
| PRT:RT | 0 | Some concerns | Undetected | No concerns | Major concerns | No concerns | Major concerns | Very low |
| PRT:WBE | 0 | Some concerns | Undetected | No concerns | Major concerns | No concerns | Major concerns | Very low |
| PRT:WE | 0 | Some concerns | Undetected | No concerns | No concerns | Major concerns | Major concerns | Very low |
| RT:WBE | 0 | Some concerns | Undetected | No concerns | Major concerns | No concerns | Major concerns | Very low |
| RT:WBV | 0 | Some concerns | Undetected | No concerns | Major concerns | No concerns | Major concerns | Very low |
| RT:WE | 0 | Some concerns | Undetected | No concerns | No concerns | No concerns | Major concerns | Very low |
| WBE:WBV | 0 | Some concerns | Undetected | No concerns | Major concerns | No concerns | Major concerns | Very low |
| WBE:WE | 0 | Some concerns | Undetected | No concerns | Major concerns | No concerns | Major concerns | Very low |
| control:WE | 0 | Some concerns | Undetected | No concerns | Major concerns | No concerns | Major concerns | Very low |

## Appendix 21.2: Details on the CINeMA assessment of each pairwise comparisons for BMD at FN

| Comparison | Number of studies | Within-study bias | Reporting bias | Indirectness | Imprecision | Heterogeneity | Incoherence | Confidence rating |
| --- | --- | --- | --- | --- | --- | --- | --- | --- |
| 1:03 | 1 | Some concerns | Undetected | No concerns | Major concerns | No concerns | No concerns | Low |
| 1:04 | 6 | No concerns | Undetected | No concerns | No concerns | Major concerns | No concerns | Low |
| 1:05 | 2 | Some concerns | Undetected | No concerns | Major concerns | No concerns | No concerns | Low |
| 1:06 | 5 | Some concerns | Undetected | No concerns | Major concerns | No concerns | No concerns | Low |
| 1:07 | 8 | Some concerns | Undetected | No concerns | Major concerns | No concerns | No concerns | Low |
| 1:08 | 6 | Some concerns | Undetected | No concerns | No concerns | Major concerns | No concerns | Low |
| 1:09 | 1 | Some concerns | Undetected | No concerns | Major concerns | No concerns | No concerns | Low |
| 1:10 | 2 | Some concerns | Undetected | No concerns | Major concerns | No concerns | No concerns | Low |
| 1:11 | 15 | Some concerns | Undetected | No concerns | Major concerns | No concerns | No concerns | Low |
| 1:12 | 9 | Some concerns | Undetected | No concerns | No concerns | Major concerns | Major concerns | Very low |
| 2:04 | 2 | No concerns | Undetected | No concerns | Major concerns | No concerns | No concerns | Low |
| 2:06 | 1 | Some concerns | Undetected | No concerns | Major concerns | No concerns | No concerns | Low |
| 4:07 | 1 | Some concerns | Undetected | No concerns | Major concerns | No concerns | Major concerns | Very low |
| 4:08 | 1 | No concerns | Undetected | No concerns | Major concerns | No concerns | No concerns | Low |
| 10:06 | 1 | Some concerns | Undetected | No concerns | Major concerns | No concerns | No concerns | Low |
| 11:03 | 2 | Some concerns | Undetected | No concerns | Major concerns | No concerns | No concerns | Low |
| 11:06 | 1 | Some concerns | Undetected | No concerns | Major concerns | No concerns | No concerns | Low |
| 11:07 | 1 | Some concerns | Undetected | No concerns | Major concerns | No concerns | No concerns | Low |
| 12:02 | 2 | Some concerns | Undetected | No concerns | No concerns | Major concerns | No concerns | Low |
| 12:03 | 1 | Some concerns | Undetected | No concerns | Major concerns | No concerns | Major concerns | Very low |
| 1:02 | 0 | Some concerns | Undetected | No concerns | Major concerns | No concerns | No concerns | Low |
| 2:03 | 0 | Some concerns | Undetected | No concerns | Major concerns | No concerns | No concerns | Low |
| 2:05 | 0 | Some concerns | Undetected | No concerns | Major concerns | No concerns | No concerns | Low |
| 2:07 | 0 | Some concerns | Undetected | No concerns | Major concerns | No concerns | No concerns | Low |
| 2:08 | 0 | Some concerns | Undetected | No concerns | Major concerns | No concerns | No concerns | Low |
| 2:09 | 0 | Some concerns | Undetected | No concerns | Major concerns | No concerns | No concerns | Low |
| 10:02 | 0 | Some concerns | Undetected | No concerns | Major concerns | No concerns | No concerns | Low |
| 11:02 | 0 | Some concerns | Undetected | No concerns | Major concerns | No concerns | No concerns | Low |
| 3:04 | 0 | Some concerns | Undetected | No concerns | Major concerns | No concerns | No concerns | Low |
| 3:05 | 0 | Some concerns | Undetected | No concerns | Major concerns | No concerns | No concerns | Low |
| 3:06 | 0 | Some concerns | Undetected | No concerns | Major concerns | No concerns | No concerns | Low |
| 3:07 | 0 | Some concerns | Undetected | No concerns | Major concerns | No concerns | No concerns | Low |
| 3:08 | 0 | Some concerns | Undetected | No concerns | Major concerns | No concerns | No concerns | Low |
| 3:09 | 0 | Some concerns | Undetected | No concerns | Major concerns | No concerns | No concerns | Low |
| 10:03 | 0 | Some concerns | Undetected | No concerns | Major concerns | No concerns | No concerns | Low |
| 4:05 | 0 | Some concerns | Undetected | No concerns | Major concerns | No concerns | No concerns | Low |
| 4:06 | 0 | Some concerns | Undetected | No concerns | Major concerns | No concerns | No concerns | Low |
| 4:09 | 0 | Some concerns | Undetected | No concerns | Major concerns | No concerns | No concerns | Low |
| 10:04 | 0 | Some concerns | Undetected | No concerns | Major concerns | No concerns | No concerns | Low |
| 11:04 | 0 | Some concerns | Undetected | No concerns | Major concerns | No concerns | No concerns | Low |
| 12:04 | 0 | Some concerns | Undetected | No concerns | Major concerns | No concerns | No concerns | Low |
| 5:06 | 0 | Some concerns | Undetected | No concerns | Major concerns | No concerns | No concerns | Low |
| 5:07 | 0 | Some concerns | Undetected | No concerns | Major concerns | No concerns | No concerns | Low |
| 5:08 | 0 | Some concerns | Undetected | No concerns | Major concerns | No concerns | No concerns | Low |
| 5:09 | 0 | Some concerns | Undetected | No concerns | Major concerns | No concerns | No concerns | Low |
| 10:05 | 0 | Some concerns | Undetected | No concerns | Major concerns | No concerns | No concerns | Low |
| 11:05 | 0 | Some concerns | Undetected | No concerns | Major concerns | No concerns | No concerns | Low |
| 12:05 | 0 | Some concerns | Undetected | No concerns | Major concerns | No concerns | No concerns | Low |
| 6:07 | 0 | Some concerns | Undetected | No concerns | Major concerns | No concerns | No concerns | Low |
| 6:08 | 0 | Some concerns | Undetected | No concerns | Major concerns | No concerns | No concerns | Low |
| 6:09 | 0 | Some concerns | Undetected | No concerns | Major concerns | No concerns | No concerns | Low |
| 12:06 | 0 | Some concerns | Undetected | No concerns | No concerns | Major concerns | No concerns | Low |
| 7:08 | 0 | Some concerns | Undetected | No concerns | Major concerns | No concerns | No concerns | Low |
| 7:09 | 0 | Some concerns | Undetected | No concerns | Major concerns | No concerns | No concerns | Low |
| 10:07 | 0 | Some concerns | Undetected | No concerns | Major concerns | No concerns | No concerns | Low |
| 12:07 | 0 | Some concerns | Undetected | No concerns | No concerns | Major concerns | No concerns | Low |
| 8:09 | 0 | Some concerns | Undetected | No concerns | Major concerns | No concerns | No concerns | Low |
| 10:08 | 0 | Some concerns | Undetected | No concerns | Major concerns | No concerns | No concerns | Low |
| 11:08 | 0 | Some concerns | Undetected | No concerns | Major concerns | No concerns | No concerns | Low |
| 12:08 | 0 | Some concerns | Undetected | No concerns | Major concerns | No concerns | No concerns | Low |
| 10:09 | 0 | Some concerns | Undetected | No concerns | Major concerns | No concerns | No concerns | Low |
| 11:09 | 0 | Some concerns | Undetected | No concerns | Major concerns | No concerns | No concerns | Low |
| 12:09 | 0 | Some concerns | Undetected | No concerns | Major concerns | No concerns | No concerns | Low |
| 10:11 | 0 | Some concerns | Undetected | No concerns | Major concerns | No concerns | No concerns | Low |
| 10:12 | 0 | Some concerns | Undetected | No concerns | Major concerns | No concerns | No concerns | Low |
| 11:12 | 0 | Some concerns | Undetected | No concerns | No concerns | Major concerns | No concerns | Low |

## Appendix 21.3: Details on the CINeMA assessment of each pairwise comparisons for BMD at TH

| Comparison | Number of studies | Within-study bias | Reporting bias | Indirectness | Imprecision | Heterogeneity | Incoherence | Confidence rating |
| --- | --- | --- | --- | --- | --- | --- | --- | --- |
| 1:03 | 1 | Some concerns | Suspected | No concerns | No concerns | Major concerns | No concerns | Very low |
| 1:04 | 3 | No concerns | Suspected | No concerns | Major concerns | No concerns | No concerns | Very low |
| 1:06 | 1 | No concerns | Suspected | No concerns | Major concerns | No concerns | No concerns | Very low |
| 1:07 | 3 | Some concerns | Suspected | No concerns | Major concerns | No concerns | No concerns | Very low |
| 1:08 | 3 | No concerns | Suspected | No concerns | Major concerns | No concerns | No concerns | Very low |
| 1:09 | 1 | Some concerns | Suspected | No concerns | Major concerns | No concerns | No concerns | Very low |
| 1:10 | 2 | Some concerns | Suspected | No concerns | No concerns | No concerns | No concerns | Very low |
| 1:11 | 8 | Some concerns | Suspected | No concerns | No concerns | Major concerns | No concerns | Very low |
| 1:12 | 5 | Some concerns | Suspected | No concerns | No concerns | Major concerns | No concerns | Very low |
| 4:08 | 1 | No concerns | Suspected | No concerns | Major concerns | No concerns | No concerns | Very low |
| 11:03 | 2 | Some concerns | Suspected | No concerns | Major concerns | No concerns | No concerns | Very low |
| 11:06 | 1 | No concerns | Suspected | No concerns | Major concerns | No concerns | No concerns | Very low |
| 12:02 | 3 | No concerns | Suspected | No concerns | Major concerns | No concerns | No concerns | Very low |
| 12:03 | 1 | Some concerns | Suspected | No concerns | Major concerns | No concerns | No concerns | Very low |
| 1:02 | 0 | Some concerns | Suspected | No concerns | Major concerns | No concerns | No concerns | Very low |
| 2:03 | 0 | Some concerns | Suspected | No concerns | Major concerns | No concerns | No concerns | Very low |
| 2:04 | 0 | No concerns | Suspected | No concerns | Major concerns | No concerns | No concerns | Very low |
| 2:06 | 0 | No concerns | Suspected | No concerns | Major concerns | No concerns | No concerns | Very low |
| 2:07 | 0 | Some concerns | Suspected | No concerns | Major concerns | No concerns | No concerns | Very low |
| 2:08 | 0 | No concerns | Suspected | No concerns | Major concerns | No concerns | No concerns | Very low |
| 2:09 | 0 | Some concerns | Suspected | No concerns | Major concerns | No concerns | No concerns | Very low |
| 10:02 | 0 | Some concerns | Suspected | No concerns | Major concerns | No concerns | No concerns | Very low |
| 11:02 | 0 | Some concerns | Suspected | No concerns | Major concerns | No concerns | No concerns | Very low |
| 3:04 | 0 | No concerns | Suspected | No concerns | No concerns | Major concerns | No concerns | Very low |
| 3:06 | 0 | No concerns | Suspected | No concerns | Major concerns | No concerns | No concerns | Very low |
| 3:07 | 0 | Some concerns | Suspected | No concerns | Major concerns | No concerns | No concerns | Very low |
| 3:08 | 0 | Some concerns | Suspected | No concerns | Major concerns | No concerns | No concerns | Very low |
| 3:09 | 0 | Some concerns | Suspected | No concerns | Major concerns | No concerns | No concerns | Very low |
| 10:03 | 0 | Some concerns | Suspected | No concerns | Major concerns | No concerns | No concerns | Very low |
| 4:06 | 0 | No concerns | Suspected | No concerns | Major concerns | No concerns | No concerns | Very low |
| 4:07 | 0 | No concerns | Suspected | No concerns | Major concerns | No concerns | No concerns | Very low |
| 4:09 | 0 | No concerns | Suspected | No concerns | Major concerns | No concerns | No concerns | Very low |
| 10:04 | 0 | No concerns | Suspected | No concerns | No concerns | No concerns | No concerns | Low |
| 11:04 | 0 | Some concerns | Suspected | No concerns | No concerns | Major concerns | No concerns | Very low |
| 12:04 | 0 | No concerns | Suspected | No concerns | No concerns | Major concerns | No concerns | Very low |
| 6:07 | 0 | Some concerns | Suspected | No concerns | Major concerns | No concerns | No concerns | Very low |
| 6:08 | 0 | No concerns | Suspected | No concerns | Major concerns | No concerns | No concerns | Very low |
| 6:09 | 0 | Some concerns | Suspected | No concerns | Major concerns | No concerns | No concerns | Very low |
| 10:06 | 0 | Some concerns | Suspected | No concerns | Major concerns | No concerns | No concerns | Very low |
| 12:06 | 0 | No concerns | Suspected | No concerns | Major concerns | No concerns | No concerns | Very low |
| 7:08 | 0 | Some concerns | Suspected | No concerns | Major concerns | No concerns | No concerns | Very low |
| 7:09 | 0 | Some concerns | Suspected | No concerns | Major concerns | No concerns | No concerns | Very low |
| 10:07 | 0 | Some concerns | Suspected | No concerns | Major concerns | No concerns | No concerns | Very low |
| 11:07 | 0 | Some concerns | Suspected | No concerns | Major concerns | No concerns | No concerns | Very low |
| 12:07 | 0 | Some concerns | Suspected | No concerns | Major concerns | No concerns | No concerns | Very low |
| 8:09 | 0 | Some concerns | Suspected | No concerns | Major concerns | No concerns | No concerns | Very low |
| 10:08 | 0 | Some concerns | Suspected | No concerns | Major concerns | No concerns | No concerns | Very low |
| 11:08 | 0 | Some concerns | Suspected | No concerns | Major concerns | No concerns | No concerns | Very low |
| 12:08 | 0 | Some concerns | Suspected | No concerns | Major concerns | No concerns | No concerns | Very low |
| 10:09 | 0 | Some concerns | Suspected | No concerns | Major concerns | No concerns | No concerns | Very low |
| 11:09 | 0 | Some concerns | Suspected | No concerns | Major concerns | No concerns | No concerns | Very low |
| 12:09 | 0 | Some concerns | Suspected | No concerns | Major concerns | No concerns | No concerns | Very low |
| 10:11 | 0 | Some concerns | Suspected | No concerns | Major concerns | No concerns | No concerns | Very low |
| 10:12 | 0 | Some concerns | Suspected | No concerns | Major concerns | No concerns | No concerns | Very low |
| 11:12 | 0 | Some concerns | Suspected | No concerns | Major concerns | No concerns | No concerns | Very low |

## Appendix 22: Funnel plot for the BMT at (A) LS, (B) FN, and (C) FN network

A.

**
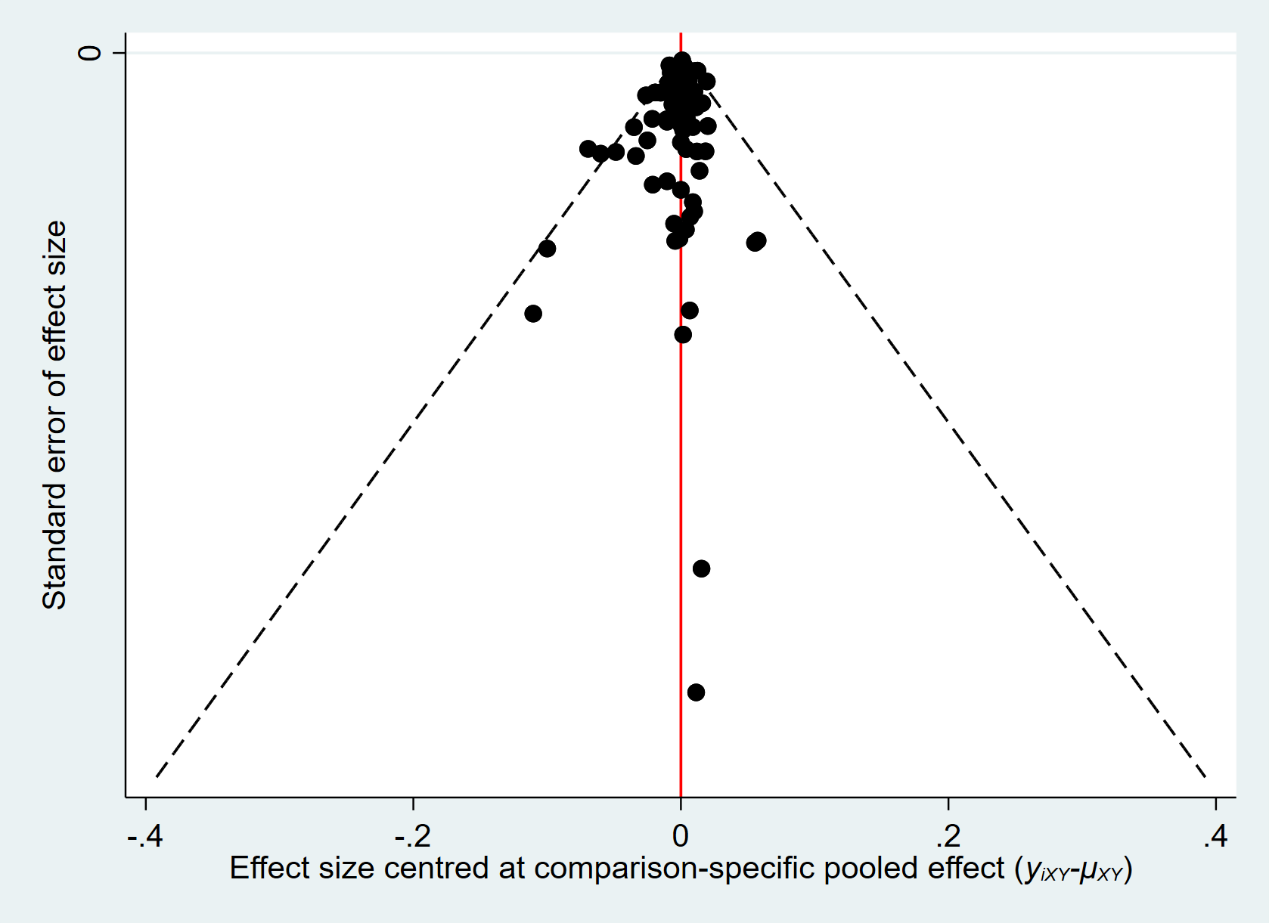
**B.

**
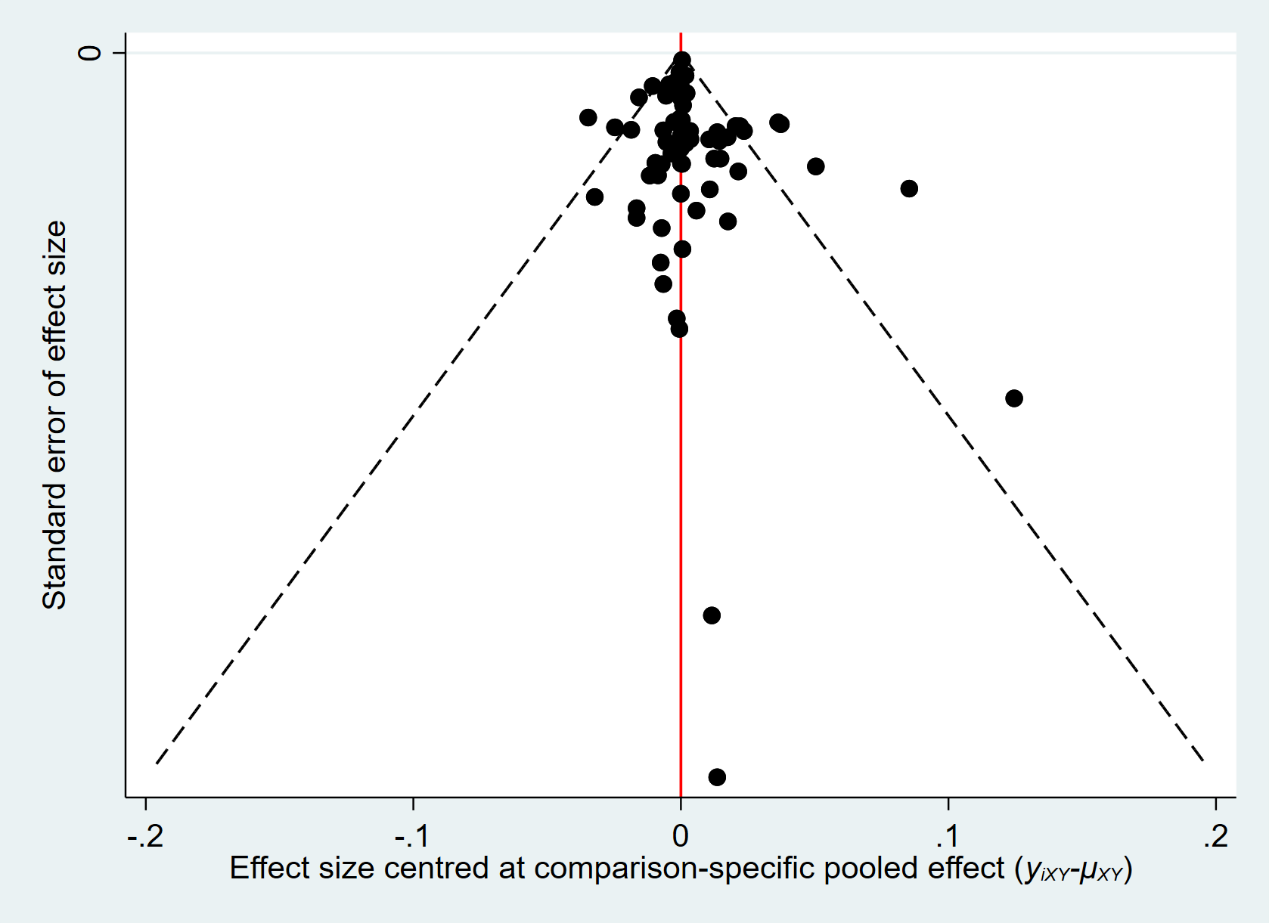
**

C.

**
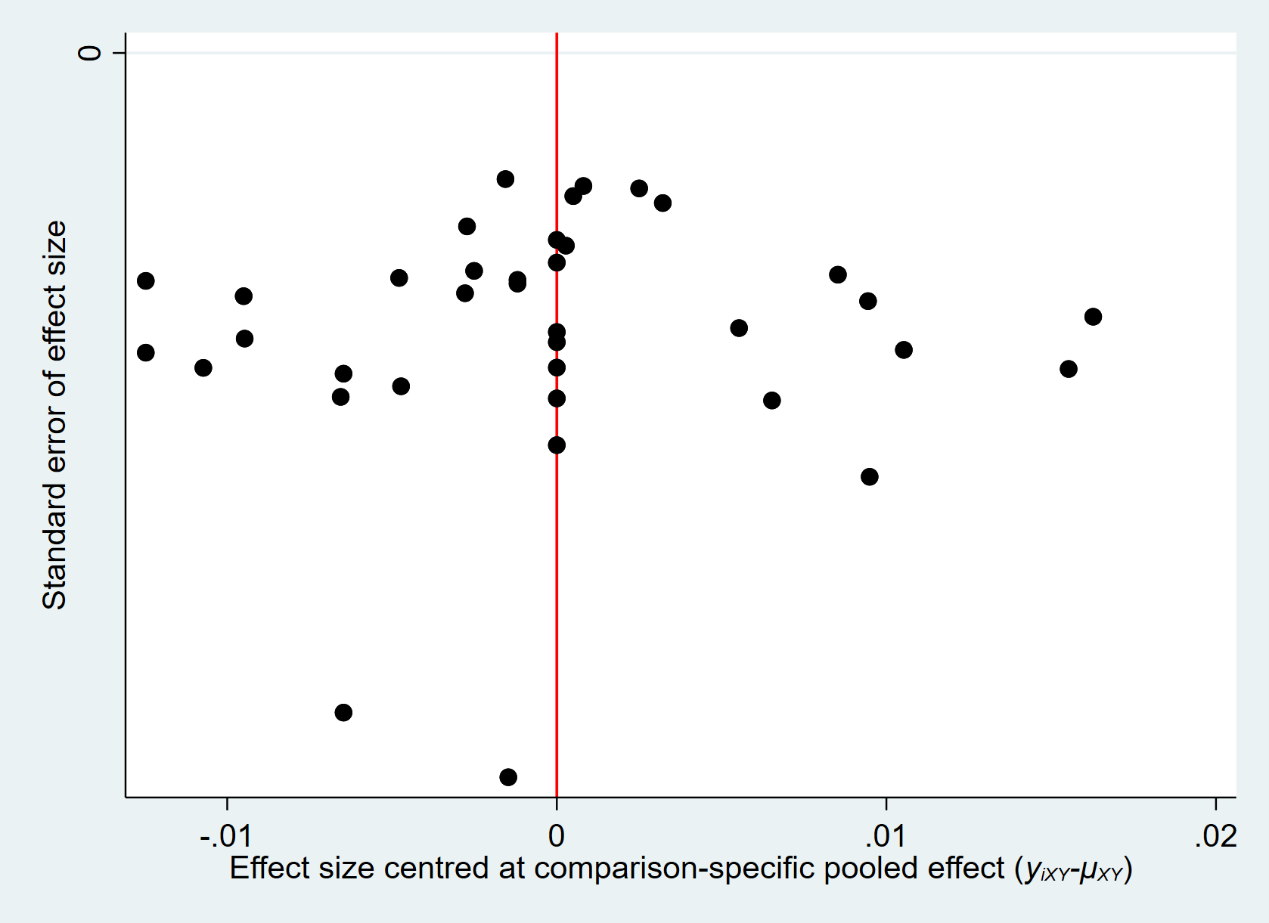
**

## Reference

1. Sherrington C, Herbert RD, Maher CG, Moseley AM. PEDro. A database of randomized trials and systematic reviews in physiotherapy. Man Ther. 2000;**5**(4):223-226.

2. Ribeiro de Avila V, Bento T, Gomes W, Leitao J, Fortuna de Sousa N. Functional Outcomes and Quality of Life After Ankle Fracture Surgically Treated: A Systematic Review. J Sport Rehabil. 2018;**27**(3):274-283.

3. Higgins JPT TJ, Chandler J, Cumpston M, Li T, Page MJ, Welch VA (editors). Cochrane Handbook for Systematic Reviews of Interventions. 2nd Edition. Chichester (UK): John Wiley & Sons. 2019.

4. G L, A A. Assessing Evidence Inconsistency in Mixed Treatment Comparisons. J Am Statist Assoc. 2006;**101**:447-449.

5. van Valkenhoef G, Dias S, Ades AE, Welton NJ. Automated generation of node-splitting models for assessment of inconsistency in network meta-analysis. Res Synth Methods. 2016;**7**(1):80-93.
